# Supplementary material for: Downregulated PDIA3P1 lncRNA Impairs Trophoblast Phenotype by Regulating Snail and SFRP1 in PE
Source: Hindawi journal article supplement (doi:10.1155/2024/8972022), 2024-01-01
Supplement: f4 [file 8972022.f4.pdf]

Supplementary table 4

| gene_id     | symbol   | description   | FoldChange | p-value   | p-adjust  | GO ID      |
|-------------|----------|---------------|------------|-----------|-----------|------------|
| ENSG000001  | PDIA3    | protein disu  | -2.5157    | 2.67E-276 | 9.57E-272 | GO:0003723 |
| ENSG000001  | LDHA     | lactate dehy  | -1.0389    | 4.60E-134 | 8.24E-130 | GO:0005634 |
| ENSG000001  | CCND1    | cyclin D1     | -1.9694    | 6.22E-124 | 7.43E-120 | GO:0001934 |
| ENSG000001  | STMN1    | stathmin 1    | -1.4605    | 3.47E-123 | 2.57E-119 | GO:0005737 |
| Novel.21209 | -        | -             | 1.1004     | 2.14E-118 | 1.28E-114 |            |
| ENSG000001  | ITGB1    | integrin sub  | -1.0602    | 2.68E-108 | 1.37E-104 | GO:0045766 |
| ENSG000001  | MTPN     | myotrophin    | -1.1209    | 4.27E-88  | 1.91E-84  | GO:0005634 |
| ENSG000001  | ITGA3    | integrin sub  | -1.2223    | 1.92E-82  | 6.89E-79  | GO:0016020 |
| ENSG000001  | RAI14    | retinoic acid | -1.1322    | 1.25E-79  | 4.07E-76  | GO:0005634 |
| ENSG000001  | PRNP     | prion protei  | -1.1713    | 1.44E-77  | 4.30E-74  | GO:0043433 |
| ENSG000002  | VDAC1    | voltage dep   | -1.0095    | 3.57E-74  | 8.53E-71  | GO:0005634 |
| ENSG000001  | CD44     | CD44 molec    | -1.0923    | 3.71E-73  | 8.31E-70  | GO:0070374 |
| ENSG000001  | SDC1     | syndecan 1    | -1.3435    | 8.66E-70  | 1.65E-66  | GO:0016020 |
| ENSG000001  | PODXL    | podocalyxin   | -1.0586    | 8.75E-70  | 1.65E-66  | GO:0016477 |
| ENSG000001  | CDK2     | cyclin deper  | -1.1305    | 2.45E-69  | 4.18E-66  | GO:0005634 |
| ENSG000001  | SRGN     | serglycin     | -1.071     | 3.37E-69  | 5.49E-66  | GO:0005794 |
| ENSG000001  | HMGA1    | high mobilit  | -1.0915    | 1.16E-68  | 1.80E-65  | GO:0045944 |
| ENSG000001  | PHLDA1   | pleckstrin hc | -1.3039    | 3.70E-68  | 5.53E-65  | GO:0005634 |
| Novel.11964 | -        | -             | 1.7887     | 8.18E-64  | 9.77E-61  |            |
| ENSG000001  | S100A6   | S100 calciu   | -1.4305    | 8.97E-61  | 1.00E-57  | GO:0005634 |
| ENSG000001  | SGPP1    | sphingosine   | -1.1303    | 2.18E-60  | 2.36E-57  | GO:0016020 |
| ENSG000001  | COL6A2   | collagen typ  | -1.095     | 4.22E-58  | 4.19E-55  | GO:0005615 |
| ENSG000001  | SERPINE1 | serpin famil  | -1.3693    | 1.17E-55  | 1.10E-52  | GO:0005615 |
| ENSG000001  | GJA1     | gap junctior  | -1.5761    | 2.29E-54  | 2.00E-51  | GO:0005921 |
| ENSG000001  | SHMT2    | serine hydr   | -1.0851    | 8.32E-54  | 7.10E-51  | GO:0005634 |
| Novel.1365  | -        | -             | 1.2051     | 1.21E-53  | 1.01E-50  |            |
| ENSG000001  | SYNE2    | spectrin rep  | 1.0795     | 2.71E-52  | 2.16E-49  | GO:0005634 |
| ENSG000001  | CD99     | CD99 molec    | -1.0481    | 4.57E-52  | 3.56E-49  | GO:0016020 |
| ENSG000001  | IL6ST    | interleukin 6 | -1.0555    | 7.73E-52  | 5.89E-49  | GO:0008284 |
| ENSG000001  | FOSL1    | FOS like 1, A | -1.4494    | 2.65E-51  | 1.98E-48  | GO:0005634 |
| ENSG000001  | ACSL4    | acyl-CoA sy   | -1.0255    | 3.15E-51  | 2.30E-48  | GO:0005737 |
| ENSG000001  | DRAP1    | DR1 associat  | -1.0189    | 9.32E-48  | 5.86E-45  | GO:0005634 |
| ENSG000001  | TTN      | titin         | 1.4126     | 2.54E-47  | 1.57E-44  | GO:0003300 |
| ENSG000001  | CCNG1    | cyclin G1     | -1.0124    | 8.82E-47  | 5.27E-44  | GO:0005634 |
| ENSG000002  | LYN      | LYN proto-c   | -1.3562    | 1.20E-45  | 6.91E-43  | GO:0001934 |
| ENSG000002  | KCNQ1OT1 | KCNQ1 opp     | 1.4356     | 1.18E-44  | 6.53E-42  |            |
| ENSG000001  | ANKRD36  | ankyrin repe  | 1.279      | 3.01E-44  | 1.61E-41  |            |
| ENSG000001  | DAP      | death associ  | -1.0846    | 4.98E-44  | 2.62E-41  | GO:0006915 |
| ENSG000001  | SARAF    | store-opera   | -1.3516    | 1.02E-42  | 4.85E-40  | GO:0016020 |
| ENSG000001  | EMP1     | epithelial m  | -1.0416    | 3.10E-42  | 1.42E-39  | GO:0016020 |
| ENSG000001  | NQO1     | NAD(P)H qu    | -1.1789    | 5.35E-42  | 2.43E-39  | GO:0003723 |
| ENSG000001  | NT5E     | 5'-nucleotic  | -1.1861    | 7.30E-42  | 3.23E-39  | GO:0005829 |
| ENSG000001  | RPL34    | ribosomal p   | -1.1027    | 3.88E-41  | 1.63E-38  | GO:0005737 |
| Novel.3436  | -        | -             | 1.8668     | 8.44E-41  | 3.52E-38  |            |
| ENSG000001  | COL6A1   | collagen typ  | -1.0177    | 9.36E-41  | 3.86E-38  | GO:0016020 |
| ENSG000001  | SFRP1    | secreted friz | -1.384     | 1.00E-38  | 3.86E-36  | GO:0005615 |

|             |            |               |         |          |          |            |
|-------------|------------|---------------|---------|----------|----------|------------|
| ENSG000002  | NOL7       | nucleolar pr  | -1.1126 | 1.22E-38 | 4.66E-36 | GO:0003723 |
| ENSG000001  | KPNA3      | karyopherin   | -1.013  | 1.22E-37 | 4.42E-35 | GO:0005634 |
| ENSG000001  | G0S2       | G0/G1 switch  | -2.681  | 3.98E-37 | 1.33E-34 | GO:0005739 |
| ENSG000001  | PRR26      | proline rich  | 2.0838  | 1.46E-36 | 4.66E-34 |            |
| ENSG000001  | FKBP10     | FK506 bindin  | -1.0709 | 1.73E-36 | 5.49E-34 | GO:0016853 |
| ENSG000001  | TOMM34     | translocase   | -1.2575 | 1.35E-35 | 4.03E-33 | GO:0005634 |
| ENSG000001  | TGM2       | transglutam   | -2.0331 | 1.56E-35 | 4.61E-33 | GO:0046872 |
| ENSG000001  | MCAM       | melanoma c    | -1.0914 | 1.75E-35 | 5.11E-33 | GO:0016020 |
| ENSG000001  | NR2F2      | nuclear rece  | -1.0846 | 5.58E-35 | 1.55E-32 | GO:0001937 |
| ENSG000001  | TNIP1      | TNFAIP3 int   | -1.1672 | 7.44E-34 | 1.99E-31 | GO:0005634 |
| ENSG000001  | RNF138     | ring finger p | -1.224  | 1.08E-33 | 2.85E-31 | GO:0005634 |
| ENSG000001  | TIMP3      | TIMP metall   | -1.237  | 2.57E-33 | 6.62E-31 | GO:0070373 |
| ENSG000001  | WNT3       | Wnt family r  | -1.1567 | 2.83E-32 | 7.09E-30 | GO:0005615 |
| ENSG000002  | CARMN      | cardiac meso  | 1.642   | 2.87E-32 | 7.15E-30 |            |
| Novel.11802 | -          | -             | -1.5735 | 3.01E-32 | 7.44E-30 |            |
| ENSG000001  | LAMB3      | laminin sub   | -1.4699 | 5.00E-32 | 1.21E-29 | GO:0007155 |
| ENSG000002  | BDNF-AS    | BDNF antise   | 1.9104  | 6.86E-32 | 1.63E-29 |            |
| ENSG000001  | PLIN2      | perilipin 2   | -1.3084 | 1.58E-31 | 3.57E-29 | GO:0016020 |
| ENSG000001  | MARCKSL1   | MARCKS like   | -1.2288 | 1.94E-31 | 4.36E-29 | GO:0005737 |
| ENSG000001  | PERP       | PERP, TP53    | -1.2159 | 2.25E-31 | 5.00E-29 | GO:0016020 |
| ENSG000001  | GCLM       | glutamate-c   | -1.245  | 2.53E-31 | 5.59E-29 | GO:0005829 |
| ENSG000001  | PLAUR      | plasminogen   | -1.2651 | 4.68E-31 | 1.01E-28 | GO:0016020 |
| ENSG000001  | CTGF       | connective t  | -1.2102 | 7.24E-31 | 1.54E-28 | GO:0070374 |
| ENSG000001  | PTX3       | pentraxin 3   | -1.7394 | 1.81E-30 | 3.78E-28 | GO:0005615 |
| ENSG000001  | SPHK1      | sphingosine   | -1.6204 | 4.01E-30 | 8.06E-28 | GO:0005737 |
| ENSG000001  | BEX3       | brain expres  | -1.094  | 5.45E-30 | 1.09E-27 | GO:0005634 |
| ENSG000001  | MOK        | MOK proteir   | -1.1133 | 6.27E-30 | 1.23E-27 | GO:0004672 |
| ENSG000002  | ITPRIPL2   | ITPRIP like 2 | -1.0052 | 2.97E-29 | 5.52E-27 | GO:0016020 |
| ENSG000002  | TMEM75     | transmembr    | 1.8919  | 1.08E-28 | 1.93E-26 |            |
| ENSG000001  | ZNF682     | zinc finger p | 1.3126  | 1.28E-28 | 2.25E-26 | GO:0003676 |
| ENSG000001  | ANGPTL4    | angiopoietin  | -1.7073 | 1.38E-28 | 2.42E-26 | GO:0051005 |
| ENSG000001  | CYBA       | cytochrome    | -1.4583 | 8.59E-28 | 1.44E-25 | GO:0016020 |
| ENSG000002  | AC022149.1 | integrin bet  | -1.3012 | 1.50E-27 | 2.50E-25 |            |
| ENSG000001  | HDAC8      | histone deac  | 1.0231  | 4.67E-27 | 7.54E-25 | GO:0031397 |
| ENSG000002  | RPS29      | ribosomal p   | -1.1314 | 4.89E-27 | 7.82E-25 | GO:0005737 |
| ENSG000001  | FGF5       | fibroblast gr | -1.2817 | 1.04E-26 | 1.59E-24 | GO:0005622 |
| ENSG000002  | NUTM2B-AS1 | NUTM2B an     | 1.1211  | 2.11E-26 | 3.19E-24 |            |
| ENSG000001  | EFHD2      | EF-hand do    | -1.0824 | 2.36E-26 | 3.54E-24 | GO:0016020 |
| ENSG000001  | FSCN1      | fascin actin- | -1.0722 | 2.86E-26 | 4.24E-24 | GO:0003723 |
| ENSG000001  | PHF19      | PHD finger p  | -1.0537 | 4.07E-25 | 5.71E-23 | GO:0046872 |
| Novel.2741E | -          | -             | 1.5534  | 2.12E-24 | 2.81E-22 |            |
| ENSG000002  | LINC-PINT  | long interge  | 1.714   | 7.40E-24 | 9.63E-22 |            |
| ENSG000001  | PPP1R12B   | protein pho   | 1.0258  | 1.05E-23 | 1.35E-21 | GO:0005737 |
| ENSG000001  | H1FX       | H1 histone f  | -1.1623 | 1.12E-23 | 1.43E-21 | GO:0003723 |
| Novel.27411 | -          | -             | 1.6323  | 1.59E-23 | 2.01E-21 |            |
| ENSG000001  | RBM38      | RNA binding   | -1.2051 | 2.48E-23 | 3.12E-21 | GO:0003676 |
| ENSG000001  | ITGA2      | integrin sub  | -1.0216 | 3.34E-23 | 4.17E-21 | GO:0016020 |
| ENSG000001  | PTP4A3     | protein tyro  | -1.3458 | 6.36E-23 | 7.77E-21 | GO:0016020 |

|             |            |               |         |          |          |            |
|-------------|------------|---------------|---------|----------|----------|------------|
| ENSG000001  | PACSIN3    | protein kina  | -1.1306 | 6.46E-23 | 7.87E-21 | GO:0005737 |
| ENSG000001  | IL11       | interleukin 1 | -1.2188 | 8.47E-23 | 1.02E-20 | GO:0008083 |
| ENSG000001  | SH3BGRL3   | SH3 domain    | -1.0451 | 8.90E-23 | 1.07E-20 | GO:0005634 |
| ENSG000001  | AEBP1      | AE binding p  | -1.1388 | 8.97E-23 | 1.07E-20 | GO:0005615 |
| ENSG000002  | MIR29B2CH  | MIR29B2 an    | 1.7594  | 3.00E-22 | 3.44E-20 |            |
| ENSG000001  | RAB31      | RAB31, mem    | -1.2085 | 5.28E-22 | 5.89E-20 | GO:0016020 |
| ENSG000001  | SPOCD1     | SPOC doma     | -1.6718 | 2.40E-21 | 2.53E-19 | GO:0006351 |
| ENSG000001  | ADAM32     | ADAM meta     | 1.8289  | 3.33E-21 | 3.50E-19 | GO:0016020 |
| ENSG000002  | AC092828.1 | novel transc  | 2.4124  | 5.92E-21 | 6.08E-19 |            |
| ENSG000001  | HIST1H1D   | histone clus  | 2.6148  | 4.32E-20 | 4.00E-18 | GO:0003723 |
| ENSG000001  | UBL4A      | ubiquitin lik | -1.0325 | 8.04E-20 | 7.16E-18 | GO:0005634 |
| ENSG000001  | DKK3       | dickkopf Wnt  | -1.0461 | 1.79E-19 | 1.54E-17 | GO:0090090 |
| ENSG000001  | GAMT       | guanidinoac   | -1.6344 | 2.01E-19 | 1.72E-17 | GO:0008168 |
| ENSG000001  | SLCO4A1    | solute carrie | -1.069  | 2.71E-19 | 2.29E-17 | GO:0016020 |
| ENSG000002  | STARD13-A  | STARD13 an    | 2.1014  | 4.96E-19 | 4.12E-17 |            |
| ENSG000001  | RP2        | RP2, ARL3 G   | -1.2703 | 5.41E-19 | 4.45E-17 | GO:0005737 |
| ENSG000001  | EFNB3      | ephrin B3     | -1.3048 | 5.94E-19 | 4.85E-17 | GO:0016020 |
| ENSG000001  | PDIA3P1    | protein disu  | -1.7951 | 1.11E-18 | 8.78E-17 |            |
| ENSG000002  | RALGAPA1F  | Ral GTPase a  | 1.6542  | 1.38E-18 | 1.08E-16 |            |
| ENSG000002  | AL031281.2 | novel protei  | 1.673   | 1.54E-18 | 1.20E-16 | GO:0000166 |
| ENSG000001  | MRPL43     | mitochondri   | -1.1603 | 1.92E-18 | 1.49E-16 | GO:0003723 |
| Novel.23497 | -          | -             | 1.4006  | 1.98E-18 | 1.53E-16 |            |
| ENSG000001  | PCLO       | piccolo pres  | 1.6968  | 2.69E-18 | 2.05E-16 | GO:0046872 |
| ENSG000002  | HELLPAR    | HELLP assoc   | 1.0314  | 1.36E-17 | 9.60E-16 |            |
| ENSG000002  | SRMP2      | spermidine s  | 2.7232  | 1.60E-17 | 1.12E-15 |            |
| ENSG000001  | ZCCHC24    | zinc finger C | -1.2286 | 1.81E-17 | 1.26E-15 | GO:0003676 |
| ENSG000001  | OMD        | osteomodul    | 2.9479  | 2.69E-17 | 1.83E-15 | GO:0007155 |
| ENSG000001  | PTGFR      | prostagland   | -1.238  | 4.05E-17 | 2.71E-15 | GO:0005737 |
| ENSG000001  | PRXL2B     | peroxiredoxi  | -1.3865 | 7.46E-17 | 4.81E-15 | GO:0005737 |
| ENSG000002  | ZNRD1ASP   | zinc ribbon c | 1.0229  | 1.08E-16 | 6.87E-15 |            |
| ENSG000002  | AC058791.1 | novel transc  | 1.9644  | 1.10E-16 | 7.00E-15 |            |
| ENSG000002  | AC087294.1 | novel transc  | 1.3041  | 1.24E-16 | 7.82E-15 |            |
| ENSG000002  | AC018628.1 | TEC           | 1.3468  | 1.94E-16 | 1.21E-14 |            |
| ENSG000001  | DUSP7      | dual specific | -1.0673 | 2.02E-16 | 1.25E-14 | GO:0005737 |
| ENSG000001  | ANPEP      | alanyl aminc  | -1.19   | 3.21E-16 | 1.93E-14 | GO:0016020 |
| ENSG000001  | ZNF66      | zinc finger p | 1.2902  | 4.28E-16 | 2.53E-14 | GO:0003676 |
| ENSG000001  | HRNR       | hornerin      | 1.7947  | 4.72E-16 | 2.77E-14 | GO:0005634 |
| ENSG000002  | AC138409.1 | integral mer  | 1.3164  | 5.15E-16 | 3.01E-14 |            |
| ENSG000002  | AF117829.1 | uncharacteri  | 1.1367  | 6.96E-16 | 4.00E-14 |            |
| ENSG000001  | OGN        | osteoglycin   | 1.8124  | 8.85E-16 | 5.02E-14 | GO:0005615 |
| ENSG000002  | PGM5P2     | phosphoglu    | 1.134   | 9.29E-16 | 5.25E-14 |            |
| ENSG000001  | NRN1       | neuritin 1    | -2.1967 | 9.84E-16 | 5.55E-14 | GO:0016020 |
| ENSG000001  | NRP1       | neuropilin 1  | -1.2181 | 1.06E-15 | 5.96E-14 | GO:0016020 |
| ENSG000001  | C9orf84    | chromosom     | 1.3771  | 1.39E-15 | 7.70E-14 | GO:0016787 |
| ENSG000002  | Z82217.1   | novel transc  | 2.0837  | 2.70E-15 | 1.47E-13 |            |
| ENSG000001  | WNK4       | WNK lysine    | -1.2947 | 2.72E-15 | 1.48E-13 | GO:0000166 |
| ENSG000001  | RPL22L1    | ribosomal p   | -1.1527 | 2.92E-15 | 1.58E-13 | GO:0005622 |
| ENSG000001  | ASPN       | asporin       | 2.2403  | 3.06E-15 | 1.65E-13 | GO:0005509 |

|             |            |                     |         |          |          |            |
|-------------|------------|---------------------|---------|----------|----------|------------|
| ENSG000001  | LRRTM2     | leucine rich        | 2.092   | 4.01E-15 | 2.12E-13 | GO:0016020 |
| ENSG000002  | AC067930.6 | TEC                 | 2.3139  | 4.34E-15 | 2.28E-13 |            |
| ENSG000001  | HIST1H1C   | histone clus        | 1.3051  | 5.27E-15 | 2.75E-13 | GO:0003723 |
| ENSG000001  | SOCS2      | suppressor c        | -1.4198 | 5.40E-15 | 2.81E-13 | GO:0005737 |
| ENSG000001  | ZNF782     | zinc finger p       | 1.2229  | 5.95E-15 | 3.09E-13 | GO:0003676 |
| ENSG000001  | MT2A       | metallothior        | -1.1114 | 6.52E-15 | 3.38E-13 | GO:0005634 |
| ENSG000001  | EGFL7      | EGF like dor        | -1.1402 | 7.06E-15 | 3.66E-13 | GO:0005509 |
| ENSG000001  | IER3       | immediate e         | -1.1275 | 8.95E-15 | 4.57E-13 | GO:0043066 |
| ENSG000002  | HIST2H2BF  | histone clus        | 2.2453  | 9.16E-15 | 4.66E-13 | GO:0005634 |
| Novel.15664 | -          | -                   | 1.0985  | 9.83E-15 | 4.96E-13 |            |
| ENSG000002  | AC016831.4 | novel transc        | 2.3065  | 1.05E-14 | 5.29E-13 |            |
| ENSG000001  | GPRC5B     | G protein- $\alpha$ | -1.1751 | 1.07E-14 | 5.36E-13 | GO:0016020 |
| ENSG000001  | ITGA7      | integrin sub        | -1.0738 | 1.39E-14 | 6.91E-13 | GO:0016020 |
| ENSG000001  | HBEGF      | heparin binc        | -1.2429 | 1.45E-14 | 7.21E-13 | GO:0005615 |
| ENSG000002  | LUCAT1     | lung cancer         | -1.3728 | 1.47E-14 | 7.30E-13 |            |
| ENSG000001  | LY6K       | lymphocyte          | -1.4778 | 1.62E-14 | 8.01E-13 | GO:0005737 |
| ENSG000001  | LRRC37A3   | leucine rich        | 1.3894  | 1.67E-14 | 8.22E-13 | GO:0016020 |
| ENSG000001  | HPCAL1     | hippocalcin         | -1.028  | 1.86E-14 | 9.15E-13 | GO:0016020 |
| ENSG000001  | IRF2BPL    | interferon re       | -1.0107 | 3.08E-14 | 1.48E-12 | GO:0005634 |
| ENSG000001  | ZBTB20     | zinc finger a       | 1.0239  | 3.46E-14 | 1.64E-12 | GO:0003676 |
| ENSG000001  | DNPH1      | 2'-deoxynuc         | -1.0697 | 5.43E-14 | 2.51E-12 | GO:0005634 |
| ENSG000001  | HTR2B      | 5-hydroxytr         | 2.9217  | 5.67E-14 | 2.60E-12 | GO:0005737 |
| ENSG000001  | CTXN1      | cortexin 1          | -1.7155 | 6.06E-14 | 2.76E-12 | GO:0016020 |
| ENSG000002  | SLFNL1-AS1 | SLFNL1 anti         | 1.0173  | 6.14E-14 | 2.79E-12 |            |
| ENSG000001  | SLC16A6    | solute carrie       | 1.4769  | 7.17E-14 | 3.22E-12 | GO:0016020 |
| ENSG000002  | DNAJC19    | DnaJ heat sh        | -1.0936 | 7.39E-14 | 3.31E-12 | GO:0016020 |
| ENSG000001  | ECM2       | extracellular       | 1.4743  | 7.43E-14 | 3.33E-12 | GO:0005576 |
| ENSG000001  | COMMD8     | COMM dom            | -1.034  | 7.44E-14 | 3.33E-12 | GO:0005634 |
| Novel.17486 | -          | -                   | 2.1253  | 8.09E-14 | 3.60E-12 |            |
| ENSG000002  | AC026124.1 | novel transc        | 1.8741  | 8.48E-14 | 3.77E-12 |            |
| ENSG000001  | TRIB3      | tribbles pse        | -1.0754 | 9.93E-14 | 4.35E-12 | GO:0003714 |
| ENSG000002  | ADGRG1     | adhesion G          | -1.188  | 1.04E-13 | 4.54E-12 | GO:0005622 |
| ENSG000002  | AC068587.4 | uncharacteri        | 1.1236  | 1.14E-13 | 4.94E-12 |            |
| ENSG000001  | CKMT2      | creatine kin        | 1.7579  | 1.64E-13 | 6.99E-12 | GO:0016020 |
| ENSG000002  | ERVFRD-1   | endogenou           | 2.3677  | 1.69E-13 | 7.17E-12 | GO:0016020 |
| ENSG000001  | FRMD5      | FERM doma           | 1.152   | 1.78E-13 | 7.54E-12 | GO:0016020 |
| ENSG000001  | EPHA4      | EPH recepto         | 1.0713  | 1.88E-13 | 7.95E-12 | GO:0016020 |
| ENSG000001  | PM20D1     | peptidase M         | 1.4152  | 2.31E-13 | 9.69E-12 | GO:0046872 |
| ENSG000002  | FLJ42393   | uncharacteri        | 1.9298  | 3.27E-13 | 1.35E-11 |            |
| ENSG000002  | LINC-PINT  | long interge        | 1.3381  | 3.46E-13 | 1.42E-11 |            |
| ENSG000002  | AC007878.1 | novel transc        | 1.8444  | 3.87E-13 | 1.58E-11 |            |
| ENSG000001  | MXD1       | MAX dimeri          | -1.0012 | 5.45E-13 | 2.21E-11 | GO:0005829 |
| ENSG000001  | LRRC75A    | leucine rich        | 1.1176  | 5.62E-13 | 2.27E-11 | GO:0005737 |
| ENSG000001  | HIST2H2BE  | histone clus        | 1.4179  | 6.15E-13 | 2.47E-11 | GO:0005634 |
| Novel.15669 | -          | -                   | 2.024   | 6.40E-13 | 2.56E-11 |            |
| Novel.27420 | -          | -                   | 1.3865  | 6.98E-13 | 2.79E-11 |            |
| ENSG000002  | RAI1-AS1   | RAI1 antiser        | 2.3457  | 8.17E-13 | 3.23E-11 |            |
| ENSG000002  | TMEM14EP   | transmembr          | 2.6383  | 9.73E-13 | 3.81E-11 |            |

|             |             |               |         |          |          |            |
|-------------|-------------|---------------|---------|----------|----------|------------|
| ENSG000001  | PIGM        | phosphatidy   | -1.113  | 1.03E-12 | 4.03E-11 | GO:0016020 |
| ENSG000001  | IGF2BP2-AS1 | IGF2BP2 ant   | 1.5239  | 1.08E-12 | 4.21E-11 |            |
| ENSG000002  | AC068491.4  | TEC           | 2.0269  | 1.26E-12 | 4.89E-11 |            |
| ENSG000002  | SMCR5       | Smith-Mage    | 2.1898  | 1.37E-12 | 5.26E-11 |            |
| ENSG000001  | LDHB        | lactate dehy  | -1.0822 | 1.46E-12 | 5.59E-11 | GO:0005737 |
| ENSG000002  | TMEM158     | transmembr    | -2.701  | 1.62E-12 | 6.16E-11 | GO:0016020 |
| ENSG000002  | AC003681.1  | novel transc  | 1.2182  | 1.64E-12 | 6.22E-11 |            |
| ENSG000000  | MGLL        | monoglycer    | -1.4141 | 2.33E-12 | 8.62E-11 | GO:0005737 |
| Novel.1947E | -           | -             | 2.058   | 3.00E-12 | 1.10E-10 |            |
| ENSG000000  | FOXC1       | forkhead bc   | -1.1957 | 3.20E-12 | 1.16E-10 | GO:0045944 |
| ENSG000001  | ANKRD36B    | ankyrin repe  | 1.1066  | 3.23E-12 | 1.17E-10 | GO:0005515 |
| ENSG000001  | ZNF410      | zinc finger p | 1.134   | 4.33E-12 | 1.54E-10 | GO:0003676 |
| ENSG000001  | CXCL12      | C-X-C motil   | -1.1381 | 4.45E-12 | 1.58E-10 | GO:0008083 |
| ENSG000000  | SEMA3B      | semaphorin    | -1.0629 | 6.25E-12 | 2.19E-10 | GO:0005783 |
| ENSG000001  | LIMD2       | LIM domain    | -1.3702 | 6.70E-12 | 2.34E-10 | GO:0005634 |
| ENSG000002  | LINC00513   | long interge  | 1.7539  | 7.85E-12 | 2.72E-10 |            |
| ENSG000002  | AC015799.1  | novel transc  | 1.2655  | 1.17E-11 | 3.98E-10 |            |
| ENSG000001  | DUSP5       | dual specific | -1.3753 | 1.20E-11 | 4.05E-10 | GO:0005634 |
| ENSG000001  | HIST1H1E    | histone clus  | 2.5213  | 1.24E-11 | 4.19E-10 | GO:0003723 |
| ENSG000002  | LCMT1-AS2   | LCMT1 antis   | 2.1697  | 1.25E-11 | 4.20E-10 |            |
| ENSG000002  | AC103810.2  | novel transc  | 1.8782  | 1.27E-11 | 4.27E-10 |            |
| ENSG000001  | MPZL3       | myelin prote  | 1.4427  | 1.40E-11 | 4.69E-10 | GO:0016020 |
| ENSG000002  | MT-RNR1     | mitochondri   | 2.2319  | 1.54E-11 | 5.13E-10 |            |
| ENSG000001  | TRIM47      | tripartite mc | -1.0096 | 1.61E-11 | 5.37E-10 | GO:0005634 |
| ENSG000000  | CEACAM1     | carcinoembr   | 2.0497  | 1.70E-11 | 5.61E-10 | GO:0016020 |
| ENSG000002  | AC009951.1  | TEC           | 2.4167  | 1.71E-11 | 5.65E-10 |            |
| ENSG000002  | HIST1H4E    | histone clus  | 2.0316  | 2.44E-11 | 7.98E-10 | GO:0003723 |
| Novel.1701C | -           | -             | 1.4169  | 2.56E-11 | 8.36E-10 |            |
| ENSG000002  | AC002558.3  | novel transc  | 1.056   | 3.20E-11 | 1.04E-09 |            |
| ENSG000001  | ABI3        | ABI family n  | -1.6063 | 3.99E-11 | 1.28E-09 | GO:0005737 |
| ENSG000002  | LINC01572   | long interge  | 1.1428  | 4.04E-11 | 1.29E-09 |            |
| ENSG000002  | AC067931.2  | TEC           | 1.955   | 4.57E-11 | 1.45E-09 |            |
| ENSG000001  | SLFNL1      | schlafen like | 1.0312  | 4.96E-11 | 1.57E-09 | GO:0000166 |
| ENSG000002  | GNAS-AS1    | GNAS antise   | 1.4315  | 5.49E-11 | 1.73E-09 |            |
| ENSG000002  | MT-RNR2     | mitochondri   | 1.6405  | 7.04E-11 | 2.19E-09 |            |
| ENSG000001  | OMG         | oligodendro   | 1.3985  | 7.29E-11 | 2.27E-09 | GO:0016020 |
| ENSG000002  | AATBC       | apoptosis as  | 1.3964  | 7.46E-11 | 2.31E-09 |            |
| ENSG000000  | GADD45B     | growth arres  | -1.1041 | 8.42E-11 | 2.59E-09 | GO:0005634 |
| ENSG000001  | HIST1H2BD   | histone clus  | 1.0984  | 1.06E-10 | 3.23E-09 | GO:0005634 |
| ENSG000001  | PLTP        | phospholipi   | -1.0071 | 1.19E-10 | 3.61E-09 | GO:0005615 |
| ENSG000001  | ENKD1       | enkurin don   | -1.0573 | 1.23E-10 | 3.72E-09 | GO:0005515 |
| ENSG000002  | AC087241.4  | novel transc  | 2.8107  | 1.29E-10 | 3.90E-09 |            |
| ENSG000001  | MAFF        | MAF bZIP tr   | -1.0258 | 1.51E-10 | 4.48E-09 | GO:0005634 |
| ENSG000002  | POU5F2      | POU domair    | 1.9352  | 1.54E-10 | 4.56E-09 | GO:0005634 |
| ENSG000001  | HIST1H1B    | histone clus  | 1.8937  | 1.90E-10 | 5.53E-09 | GO:0003723 |
| ENSG000002  | AC138409.2  | Putative bet  | 1.1028  | 1.91E-10 | 5.56E-09 |            |
| ENSG000001  | METTLL26    | methyltrans   | -1.0659 | 2.03E-10 | 5.89E-09 |            |
| ENSG000002  | TMEM161B-   | TMEM161B a    | 1.2488  | 2.46E-10 | 7.07E-09 |            |

|            |            |                |         |          |          |            |
|------------|------------|----------------|---------|----------|----------|------------|
| ENSG000001 | PLAU       | plasminogen    | -1.2868 | 2.60E-10 | 7.43E-09 | GO:0008236 |
| ENSG000001 | ZNF138     | zinc finger p  | 1.0746  | 3.31E-10 | 9.34E-09 | GO:0003676 |
| ENSG000001 | ETV4       | ETS variant 4  | -1.5873 | 3.47E-10 | 9.74E-09 | GO:0005634 |
| ENSG000001 | ANKRD20A5  | ankyrin repe   | 1.3849  | 3.92E-10 | 1.09E-08 |            |
| ENSG000001 | KRT34      | keratin 34     | -2.2574 | 4.23E-10 | 1.17E-08 | GO:0005198 |
| ENSG000002 | HSPA1A     | heat shock p   | -1.1553 | 4.57E-10 | 1.26E-08 | GO:0010628 |
| ENSG000001 | TPPP       | tubulin poly   | 1.0374  | 4.76E-10 | 1.31E-08 | GO:0005634 |
| ENSG000002 | ALMS1-IT1  | ALMS1 intrc    | 1.4557  | 5.80E-10 | 1.57E-08 |            |
| ENSG000002 | OFD1P17    | OFD1 pseud     | 1.9727  | 5.80E-10 | 1.57E-08 |            |
| ENSG000002 | KRT8P14    | keratin 8 pse  | -1.0859 | 5.91E-10 | 1.60E-08 |            |
| ENSG000001 | ZNF235     | zinc finger p  | 1.3505  | 6.64E-10 | 1.79E-08 | GO:0003676 |
| ENSG000002 | AL022323.4 | novel transc   | 1.5378  | 8.08E-10 | 2.16E-08 |            |
| ENSG000000 | FLT4       | fms related t  | -1.065  | 8.43E-10 | 2.24E-08 | GO:0005634 |
| ENSG000000 | ATP2A3     | ATPase sarco   | -1.36   | 9.36E-10 | 2.48E-08 | GO:0005634 |
| ENSG000001 | ZNF695     | zinc finger p  | 1.0403  | 9.67E-10 | 2.56E-08 | GO:0003676 |
| ENSG000002 | AP002833.3 | TEC            | 1.5459  | 1.02E-09 | 2.69E-08 |            |
| ENSG000002 | AC092881.1 | TEC            | 1.8951  | 1.12E-09 | 2.94E-08 |            |
| ENSG000002 | AL353795.3 | TEC            | 2.289   | 1.28E-09 | 3.32E-08 |            |
| ENSG000002 | MALAT1     | metastasis a   | 1.1161  | 1.42E-09 | 3.66E-08 |            |
| ENSG000002 | AL358216.1 | novel transc   | 2.1897  | 1.52E-09 | 3.91E-08 |            |
| ENSG000002 | GAPDHP1    | glyceraldehy   | -1.1254 | 1.80E-09 | 4.59E-08 |            |
| ENSG000002 | AC103796.1 | novel transc   | 2.1735  | 1.81E-09 | 4.60E-08 |            |
| ENSG000001 | STXBP5L    | syntaxin bin   | 2.1331  | 1.82E-09 | 4.62E-08 | GO:0005737 |
| ENSG000001 | CLEC11A    | C-type lectin  | -1.0148 | 1.82E-09 | 4.62E-08 | GO:0005737 |
| ENSG000002 | HSPA1B     | heat shock p   | -1.0438 | 2.12E-09 | 5.31E-08 | GO:0010628 |
| ENSG000001 | UBE3D      | ubiquitin pr   | 1.0247  | 2.34E-09 | 5.82E-08 | GO:0005737 |
| ENSG000002 | HIST1H2AE  | histone clus   | 2.0081  | 2.85E-09 | 6.99E-08 | GO:0005634 |
| ENSG000001 | MYEOV      | myeloma ov     | -2.2276 | 2.89E-09 | 7.08E-08 |            |
| ENSG000002 | EDDM13     | epididymal     | 1.55    | 3.19E-09 | 7.79E-08 | GO:0016020 |
| ENSG000001 | DUSP4      | dual specific  | -1.5055 | 3.40E-09 | 8.25E-08 | GO:0005634 |
| ENSG000002 | AC008105.3 | novel transc   | -1.2659 | 4.53E-09 | 1.08E-07 |            |
| ENSG000002 | AP003900.1 | novel transc   | 2.1745  | 4.80E-09 | 1.14E-07 |            |
| ENSG000001 | ESM1       | endothelial    | -3.8382 | 4.91E-09 | 1.16E-07 | GO:0005576 |
| ENSG000002 | MIR1206    | microRNA 1     | 2.2484  | 5.00E-09 | 1.18E-07 |            |
| ENSG000002 | AC017002.1 | novel transc   | 2.3608  | 5.74E-09 | 1.35E-07 |            |
| ENSG000001 | CYP3A5     | cytochrome     | 1.5119  | 5.84E-09 | 1.37E-07 | GO:0016020 |
| ENSG000001 | SOX9       | SRY-box 9      | -1.8115 | 5.97E-09 | 1.40E-07 | GO:0045944 |
| ENSG000001 | RASGRP1    | RAS guanyl     | 1.3978  | 6.31E-09 | 1.47E-07 | GO:0005737 |
| ENSG000001 | INHBB      | inhibin subt   | -1.4991 | 7.07E-09 | 1.64E-07 | GO:0008083 |
| ENSG000002 | AL136164.3 | TEC            | 1.1806  | 7.33E-09 | 1.69E-07 |            |
| ENSG000001 | PSG6       | pregnancy s    | 3.0842  | 7.73E-09 | 1.77E-07 | GO:0005576 |
| ENSG000002 | SNHG14     | small nuclec   | 2.1782  | 7.85E-09 | 1.80E-07 |            |
| ENSG000002 | AC092801.1 | novel transc   | 2.4556  | 8.32E-09 | 1.90E-07 |            |
| ENSG000002 | LINC01535  | long interge   | 1.2427  | 9.39E-09 | 2.13E-07 |            |
| ENSG000001 | IGFBP4     | insulin like c | -1.1907 | 9.96E-09 | 2.25E-07 | GO:0005576 |
| ENSG000001 | ARID5A     | AT-rich inte   | -1.1042 | 1.00E-08 | 2.26E-07 | GO:0003723 |
| ENSG000002 | RF00598    | -              | 2.7177  | 1.06E-08 | 2.39E-07 |            |
| ENSG000002 | PCDHGB6    | protocadher    | 2.116   | 1.14E-08 | 2.55E-07 | GO:0016020 |

|             |            |                     |         |          |          |            |
|-------------|------------|---------------------|---------|----------|----------|------------|
| ENSG000001  | ADM2       | adrenomed           | -1.3838 | 1.19E-08 | 2.67E-07 | GO:0005622 |
| ENSG000002  | AF131215.2 | novel transc        | 1.7733  | 1.21E-08 | 2.69E-07 |            |
| ENSG000001  | ANGPTL1    | angiopoietin        | 1.8743  | 1.32E-08 | 2.92E-07 | GO:0005576 |
| ENSG000002  | N4BP2L2-IT | N4BPL2 intr         | 1.3074  | 1.32E-08 | 2.92E-07 |            |
| Novel.1364  | -          | -                   | 1.9774  | 1.39E-08 | 3.07E-07 |            |
| ENSG000001  | JUP        | junction pla        | -1.3066 | 1.62E-08 | 3.53E-07 | GO:0043537 |
| ENSG000001  | GNGT2      | G protein su        | -1.3895 | 1.63E-08 | 3.54E-07 | GO:0016020 |
| ENSG000001  | NDUFV2     | NADH:ubiqu          | 1.663   | 1.74E-08 | 3.77E-07 | GO:0016020 |
| ENSG000002  | EPN2-AS1   | EPN2 antise         | 1.1927  | 2.01E-08 | 4.31E-07 |            |
| ENSG000002  | GMDS-DT    | GMDS diver          | 1.4263  | 2.07E-08 | 4.43E-07 |            |
| ENSG000002  | HIST1H3A   | histone clus        | 3.3617  | 2.09E-08 | 4.46E-07 | GO:0005634 |
| ENSG000002  | AC091132.4 | novel transc        | 1.7516  | 2.09E-08 | 4.46E-07 |            |
| ENSG000001  | GCNT7      | glucosaminy         | 1.5747  | 2.36E-08 | 5.01E-07 | GO:0016020 |
| ENSG000001  | ZNF233     | zinc finger p       | 1.7213  | 2.44E-08 | 5.17E-07 | GO:0003676 |
| ENSG000001  | HIST1H2AI  | histone clus        | 2.2932  | 2.46E-08 | 5.19E-07 | GO:0005634 |
| ENSG000002  | FOXP1-IT1  | FOXP1 intro         | 2.2999  | 2.59E-08 | 5.44E-07 |            |
| ENSG000001  | HIST1H2BC  | histone clus        | 1.957   | 2.76E-08 | 5.76E-07 | GO:0005634 |
| ENSG000002  | HIST1H2BG  | histone clus        | 1.7114  | 2.81E-08 | 5.86E-07 | GO:0005634 |
| ENSG000002  | AC008781.2 | uncharacteri        | 2.0714  | 2.93E-08 | 6.07E-07 |            |
| ENSG000001  | PDZD2      | PDZ domair          | 1.1208  | 3.04E-08 | 6.28E-07 | GO:0005634 |
| ENSG000001  | INSYN2     | inhibitory sy       | 1.658   | 3.05E-08 | 6.29E-07 | GO:0016020 |
| Novel.17002 | -          | -                   | 1.8364  | 3.47E-08 | 7.11E-07 |            |
| ENSG000001  | VWA1       | von Willebra        | -1.3245 | 3.64E-08 | 7.42E-07 | GO:0005576 |
| ENSG000002  | AC004884.2 | novel transc        | 2.708   | 3.90E-08 | 7.91E-07 |            |
| ENSG000002  | AP002833.2 | novel transc        | 2.7005  | 4.08E-08 | 8.26E-07 |            |
| ENSG000002  | Z97832.2   | novel transc        | 1.255   | 4.15E-08 | 8.38E-07 |            |
| ENSG000002  | AL132655.1 | novel transc        | 1.5853  | 4.33E-08 | 8.75E-07 |            |
| ENSG000001  | MAGI2      | membrane a          | 1.0708  | 4.71E-08 | 9.46E-07 | GO:0005634 |
| ENSG000002  | AC091181.1 | TEC                 | 2.0008  | 4.78E-08 | 9.57E-07 |            |
| ENSG000002  | AC024451.2 | NSFL1 (p97)         | 1.8892  | 4.78E-08 | 9.58E-07 |            |
| ENSG000002  | AC131649.2 | TEC                 | 1.7327  | 5.08E-08 | 1.02E-06 |            |
| ENSG000001  | GPR18      | G protein- $\alpha$ | 2.1622  | 5.13E-08 | 1.02E-06 | GO:0016020 |
| ENSG000001  | ZNF750     | zinc finger p       | 2.031   | 5.25E-08 | 1.05E-06 | GO:0005634 |
| ENSG000002  | AL049830.4 | intraflagella       | 2.5541  | 5.68E-08 | 1.13E-06 |            |
| ENSG000002  | LINC02407  | long interge        | -1.6142 | 5.70E-08 | 1.13E-06 |            |
| ENSG000002  | AC091132.3 | TEC                 | 1.3425  | 5.82E-08 | 1.15E-06 |            |
| ENSG000001  | PCOLCE     | procollagen         | -1.079  | 5.91E-08 | 1.17E-06 | GO:0005615 |
| ENSG000002  | AC002558.2 | novel transc        | 1.5167  | 6.20E-08 | 1.22E-06 |            |
| ENSG000001  | NT5C       | 5', 3'-nudec        | -1.0243 | 6.91E-08 | 1.35E-06 | GO:0016311 |
| Novel.5903  | -          | -                   | 1.8242  | 6.95E-08 | 1.36E-06 |            |
| ENSG000002  | AC004898.1 | UBX domair          | 2.3919  | 7.14E-08 | 1.39E-06 |            |
| ENSG000002  | PSG1       | pregnancy s         | 1.8924  | 7.94E-08 | 1.54E-06 | GO:0005515 |
| ENSG000001  | UBTD1      | ubiquitin dc        | -1.065  | 8.25E-08 | 1.59E-06 | GO:0005515 |
| ENSG000002  | RN7SL648P  | RNA, 7SL, cy        | 2.5607  | 9.02E-08 | 1.74E-06 |            |
| ENSG000002  | AC026362.2 | novel transc        | 1.4752  | 9.30E-08 | 1.79E-06 |            |
| ENSG000001  | LPAR6      | lysophosphi         | 1.6637  | 9.43E-08 | 1.81E-06 | GO:0016020 |
| ENSG000001  | DNAH7      | dynein axon         | 1.1198  | 9.77E-08 | 1.87E-06 | GO:0005737 |
| ENSG000001  | CCDC85B    | coiled-coil c       | -1.0051 | 1.05E-07 | 2.00E-06 | GO:0005634 |

|             |            |              |         |          |          |            |
|-------------|------------|--------------|---------|----------|----------|------------|
| ENSG000001  | TUBB2B     | tubulin beta | -1.2196 | 1.07E-07 | 2.03E-06 | GO:0005634 |
| Novel.1265C | -          | -            | 1.0377  | 1.15E-07 | 2.17E-06 |            |
| ENSG000002  | AC115223.1 | ribosomal p  | -1.1499 | 1.16E-07 | 2.18E-06 |            |
| ENSG000002  | AC138951.1 | POM121 me    | 1.4977  | 1.21E-07 | 2.26E-06 |            |
| ENSG000001  | LEF1       | lymphoid er  | -1.7894 | 1.24E-07 | 2.32E-06 | GO:0045944 |
| ENSG000002  | AL359918.1 | proteasome   | 1.6661  | 1.30E-07 | 2.43E-06 |            |
| ENSG000002  | AC122718.2 | DEAD (Asp-   | 2.2976  | 1.32E-07 | 2.45E-06 |            |
| ENSG000002  | AC127070.4 | novel transc | 1.3648  | 1.32E-07 | 2.45E-06 |            |
| ENSG000002  | PCDHGA8    | protocadher  | 1.6886  | 1.36E-07 | 2.51E-06 | GO:0016020 |
| ENSG000002  | HNRNPA1P   | heterogene   | 2.8755  | 1.38E-07 | 2.54E-06 |            |
| ENSG000001  | CACNB2     | calcium volt | 1.2099  | 1.39E-07 | 2.57E-06 | GO:1904879 |
| ENSG000002  | AKT3-IT1   | AKT3 intron  | 2.0209  | 1.44E-07 | 2.64E-06 |            |
| ENSG000002  | AL589655.1 | pseudogene   | 2.7749  | 1.56E-07 | 2.85E-06 |            |
| ENSG000002  | KCNQ5-IT1  | KCNQ5 intr   | 1.8351  | 1.62E-07 | 2.96E-06 |            |
| ENSG000002  | MIR503HG   | MIR503 host  | -1.0901 | 1.67E-07 | 3.03E-06 |            |
| ENSG000002  | PRKCA-AS1  | PRKCA antis  | 2.0062  | 1.68E-07 | 3.04E-06 |            |
| ENSG000002  | RAB30-AS1  | RAB30 antis  | 1.0215  | 1.73E-07 | 3.14E-06 |            |
| ENSG000002  | AC005476.1 | PDZ domair   | 2.6116  | 1.78E-07 | 3.22E-06 |            |
| ENSG000001  | CXCL1      | C-X-C motif  | -2.4698 | 1.96E-07 | 3.54E-06 | GO:0008083 |
| ENSG000001  | KCNK2      | potassium t  | -1.2391 | 1.99E-07 | 3.58E-06 | GO:0016020 |
| ENSG000001  | B3GALT2    | beta-1,3-ga  | 1.7731  | 2.00E-07 | 3.59E-06 | GO:0016020 |
| ENSG000002  | AC005261.5 | TEC          | 1.1325  | 2.04E-07 | 3.66E-06 |            |
| ENSG000001  | CACNA1G    | calcium volt | -1.7062 | 2.06E-07 | 3.68E-06 | GO:0005737 |

|               |            |               |                        |          |          |            |
|---------------|------------|---------------|------------------------|----------|----------|------------|
| channel activ | hsa:8913   | hsa04010;hs   | MAPK signaling pathway | 21.4     | 71.21    |            |
| ENSG000002    | RNU4-25P   | RNA, U4 sm    | 2.3376                 | 2.11E-07 | 3.77E-06 |            |
| ENSG000001    | CLDN18     | claudin 18    | 1.6018                 | 2.12E-07 | 3.79E-06 | GO:0016020 |
| ENSG000001    | KLF16      | Kruppel like  | -1.0209                | 2.35E-07 | 4.16E-06 | GO:0003676 |
| ENSG000002    | RNA5-8SN2  | RNA, 5.8S ril | 1.9029                 | 2.46E-07 | 4.33E-06 |            |
| ENSG000002    | AF127577.6 | TEC           | 1.7407                 | 2.50E-07 | 4.41E-06 |            |
| ENSG000002    | AC005480.1 | novel transc  | 1.2932                 | 2.56E-07 | 4.50E-06 |            |
| ENSG000002    | AC108471.1 | ribosomal p   | 1.9996                 | 2.67E-07 | 4.66E-06 |            |
| ENSG000001    | DNAH6      | dynein axon   | 1.3017                 | 2.87E-07 | 4.99E-06 | GO:0005737 |
| ENSG000002    | AC105233.5 | novel transc  | 1.1749                 | 2.89E-07 | 5.03E-06 |            |
| ENSG000002    | AL157938.3 | novel transc  | 2.0735                 | 2.90E-07 | 5.04E-06 |            |
| ENSG000001    | TNFRSF11A  | TNF recepto   | -1.1345                | 2.90E-07 | 5.04E-06 | GO:0051091 |
| ENSG000002    | AF131215.1 | ribosomal p   | 2.5832                 | 3.09E-07 | 5.36E-06 |            |
| ENSG000001    | KCNK6      | potassium t   | -1.2788                | 3.12E-07 | 5.40E-06 | GO:0016020 |
| ENSG000002    | AL049840.5 | novel transc  | 1.4002                 | 3.32E-07 | 5.72E-06 |            |
| ENSG000002    | AC127035.1 | novel transc  | 1.8505                 | 3.58E-07 | 6.14E-06 |            |
| ENSG000001    | ANKAR      | ankyrin and   | 1.0562                 | 3.65E-07 | 6.26E-06 | GO:0016020 |
| ENSG000001    | ZNF670-ZN  | ZNF670-ZN     | 1.8753                 | 3.66E-07 | 6.26E-06 | GO:0003676 |
| ENSG000002    | AL138759.1 | novel transc  | 1.4766                 | 3.69E-07 | 6.30E-06 |            |
| ENSG000002    | HIST1H3C   | histone dus   | 2.733                  | 3.71E-07 | 6.32E-06 | GO:0005634 |
| ENSG000002    | HIST1H2AL  | histone dus   | 2.111                  | 3.79E-07 | 6.44E-06 | GO:0005634 |
| ENSG000002    | AC139887.2 | uncharacteri  | 1.1222                 | 4.06E-07 | 6.88E-06 |            |
| ENSG000002    | ZNF571-AS  | ZNF571 anti   | 1.5616                 | 4.53E-07 | 7.62E-06 |            |



|            |            |                     |         |          |          |            |
|------------|------------|---------------------|---------|----------|----------|------------|
| ENSG000002 | AC010422.4 | novel transc        | 2.0747  | 4.63E-07 | 7.76E-06 |            |
| ENSG000002 | AP001442.1 | novel transc        | 1.6104  | 4.63E-07 | 7.77E-06 |            |
| ENSG000002 | AC018628.2 | novel transc        | 1.7611  | 4.90E-07 | 8.17E-06 |            |
| ENSG000002 | ZNF853     | zinc finger p       | -1.3702 | 5.08E-07 | 8.44E-06 | GO:0003676 |
| ENSG000002 | Z95331.1   | novel transc        | 1.2064  | 5.20E-07 | 8.63E-06 |            |
| ENSG000001 | CCDC171    | coiled-coil c       | 1.0044  | 5.27E-07 | 8.73E-06 |            |
| ENSG000001 | PDE10A     | phosphodie          | 1.0325  | 5.61E-07 | 9.26E-06 | GO:0005737 |
| ENSG000001 | KCNJ13     | potassium v         | 1.8933  | 5.61E-07 | 9.26E-06 | GO:0016020 |
| ENSG000001 | DUSP6      | dual specific       | -1.383  | 5.91E-07 | 9.70E-06 | GO:0005737 |
| ENSG000002 | AL157938.2 | novel transc        | 2.1389  | 5.96E-07 | 9.76E-06 |            |
| ENSG000002 | ZFPM2-AS1  | ZFPM2 antis         | 1.2781  | 5.98E-07 | 9.78E-06 |            |
| ENSG000001 | CDC42      | cell division       | 1.446   | 6.88E-07 | 1.11E-05 | GO:0005737 |
| Novel.2015 | -          | -                   | 1.5096  | 6.93E-07 | 1.12E-05 |            |
| ENSG000002 | RNA5SP278  | RNA, 5S ribc        | 3.0963  | 6.98E-07 | 1.13E-05 |            |
| ENSG000001 | NEB        | nebulin             | 1.1942  | 7.02E-07 | 1.13E-05 | GO:0005737 |
| ENSG000002 | GPSM3      | G protein sig       | -1.0244 | 7.04E-07 | 1.14E-05 | GO:0030695 |
| ENSG000002 | AC016596.1 | ribosomal p         | -2.5347 | 7.11E-07 | 1.15E-05 |            |
| ENSG000002 | TAS2R30    | taste 2 recep       | 2.9562  | 7.16E-07 | 1.15E-05 | GO:0016020 |
| ENSG000001 | OR2L5      | olfactory rec       | 3.3159  | 7.22E-07 | 1.16E-05 | GO:0016020 |
| ENSG000001 | RAB27B     | RAB27B, me          | -1.2653 | 7.82E-07 | 1.25E-05 | GO:0003924 |
| ENSG000002 | DDX50P1    | DEAD-box h          | 1.5864  | 8.15E-07 | 1.30E-05 |            |
| ENSG000001 | IMPA2      | inositol mor        | -1.1025 | 8.20E-07 | 1.31E-05 | GO:0046854 |
| ENSG000002 | HIST1H2BO  | histone clus        | 2.0945  | 8.23E-07 | 1.31E-05 | GO:0005634 |
| ENSG000002 | AC005183.1 | SDA1 domai          | 1.939   | 8.26E-07 | 1.32E-05 |            |
| ENSG000002 | AF131215.4 | novel transc        | 1.4622  | 8.46E-07 | 1.35E-05 |            |
| ENSG000002 | AC009032.1 | novel transc        | 1.4017  | 9.24E-07 | 1.46E-05 |            |
| ENSG000002 | PSG10P     | pregnancy s         | 2.5449  | 9.30E-07 | 1.47E-05 |            |
| ENSG000002 | AL359922.2 | novel transc        | 1.1536  | 9.79E-07 | 1.54E-05 |            |
| ENSG000002 | PCDHGA11   | protocadher         | 2.1531  | 9.93E-07 | 1.56E-05 | GO:0016020 |
| ENSG000001 | GPR22      | G protein- $\alpha$ | 2.2529  | 1.01E-06 | 1.58E-05 | GO:0016020 |
| ENSG000002 | HIST1H2BH  | histone clus        | 1.3118  | 1.01E-06 | 1.58E-05 | GO:0005634 |
| ENSG000001 | NRGN       | neurogranin         | -1.8099 | 1.05E-06 | 1.64E-05 | GO:0016301 |
| ENSG000002 | OR2L1P     | olfactory rec       | 3.2624  | 1.13E-06 | 1.74E-05 |            |
| ENSG000001 | PGF        | placental gr        | -1.3245 | 1.13E-06 | 1.75E-05 | GO:0016020 |
| ENSG000002 | AL133230.1 | novel transc        | 1.3805  | 1.14E-06 | 1.76E-05 |            |
| ENSG000002 | LINC00894  | long interge        | 1.3435  | 1.14E-06 | 1.76E-05 |            |
| ENSG000002 | HIST1H2BM  | histone clus        | 2.4283  | 1.14E-06 | 1.77E-05 | GO:0005634 |
| ENSG000002 | AC011447.6 | TEC                 | 1.0605  | 1.16E-06 | 1.78E-05 |            |
| ENSG000001 | FLG        | filaggrin           | 1.1506  | 1.17E-06 | 1.80E-05 | GO:0005634 |
| ENSG000002 | AC078846.1 | novel transc        | 1.1546  | 1.18E-06 | 1.82E-05 |            |
| ENSG000001 | DCLK1      | doublecortin        | -1.0751 | 1.34E-06 | 2.03E-05 | GO:0005622 |
| ENSG000001 | DPM3       | dolichyl-ph         | -1.219  | 1.35E-06 | 2.05E-05 | GO:0016020 |
| ENSG000001 | SHC2       | SHC adaptor         | -1.1681 | 1.44E-06 | 2.17E-05 | GO:0035556 |
| ENSG000002 | HIST1H2BF  | histone clus        | 2.1422  | 1.44E-06 | 2.17E-05 | GO:0005634 |
| ENSG000002 | PSMD10P1   | proteasome          | 1.2737  | 1.46E-06 | 2.20E-05 |            |
| ENSG000001 | FOXC2      | forkhead bc         | -1.2553 | 1.46E-06 | 2.20E-05 | GO:0010595 |
| ENSG000002 | AC011933.2 | novel transc        | 1.9442  | 1.47E-06 | 2.21E-05 |            |
| ENSG000001 | SERPIND1   | serpin famil        | 1.8782  | 1.51E-06 | 2.26E-05 | GO:0005615 |

|                 |            |               |         |          |          |            |
|-----------------|------------|---------------|---------|----------|----------|------------|
| ENSG00000105651 | CYB561     | cytochrome    | -1.1971 | 1.60E-06 | 2.39E-05 | GO:0016020 |
| ENSG00000105651 | YPEL4      | yippee like 4 | 1.3689  | 1.68E-06 | 2.50E-05 | GO:0005634 |
| ENSG00000105651 | AC009044.1 | TEC           | 3.2642  | 1.72E-06 | 2.56E-05 |            |
| ENSG00000105651 | SPDYE6     | speedy/RIN1   | 1.0756  | 1.80E-06 | 2.67E-05 | GO:0019901 |
| ENSG00000105651 | LINC02577  | long interge  | 1.2948  | 1.89E-06 | 2.78E-05 |            |
| ENSG00000105651 | AC008498.2 | novel transc  | 2.2975  | 1.95E-06 | 2.86E-05 |            |
| ENSG00000105651 | ST7-OT4    | ST7 overlap   | 2.2088  | 1.98E-06 | 2.91E-05 |            |
| ENSG00000105651 | PSG7       | pregnancy s   | 2.4347  | 1.99E-06 | 2.92E-05 | GO:0005576 |
| ENSG00000105651 | TAS2R31    | taste 2 recep | 2.2003  | 2.00E-06 | 2.94E-05 | GO:0016020 |
| ENSG00000105651 | AC005730.3 | novel transc  | 1.4352  | 2.24E-06 | 3.27E-05 |            |
| ENSG00000105651 | EIF4BP3    | eukaryotic ti | -1.7459 | 2.26E-06 | 3.30E-05 |            |
| ENSG00000105651 | HIST1H4H   | histone clus  | 1.2954  | 2.27E-06 | 3.30E-05 | GO:0003723 |
| ENSG00000105651 | EGR1       | early growth  | -1.8912 | 2.31E-06 | 3.36E-05 | GO:0010628 |
| ENSG00000105651 | AC025178.1 | novel transc  | 2.2392  | 2.39E-06 | 3.46E-05 |            |
| Novel.27404     | -          | -             | 2.3777  | 2.42E-06 | 3.50E-05 |            |
| ENSG00000105651 | B4GALNT4   | beta-1,4-N-   | -1.0151 | 2.46E-06 | 3.55E-05 | GO:0016020 |
| ENSG00000105651 | AC117382.1 | DnaJ (Hsp40   | 1.937   | 2.47E-06 | 3.57E-05 |            |
| ENSG00000105651 | ALDH2      | aldehyde de   | -1.1924 | 2.49E-06 | 3.59E-05 | GO:0016491 |
| ENSG00000105651 | AL360270.2 | novel transc  | 1.906   | 2.73E-06 | 3.92E-05 |            |
| ENSG00000105651 | PCDHA9     | protocadher   | 2.0918  | 2.81E-06 | 4.02E-05 | GO:0016020 |
| ENSG00000105651 | AL121989.1 | novel transc  | 2.9347  | 2.88E-06 | 4.11E-05 |            |
| ENSG00000105651 | AQP11      | aquaporin 1   | 1.0544  | 2.89E-06 | 4.12E-05 | GO:0016020 |
| ENSG00000105651 | SNCG       | synuclein ga  | -1.7963 | 2.94E-06 | 4.18E-05 | GO:0005737 |
| ENSG00000105651 | AC100821.1 | ESF1, nuclec  | 1.1332  | 3.03E-06 | 4.30E-05 |            |
| ENSG00000105651 | MTND2P2    | MT-ND2 ps     | 3.7308  | 3.04E-06 | 4.31E-05 |            |
| ENSG00000105651 | C2CD4C     | C2 calcium c  | -1.1745 | 3.10E-06 | 4.39E-05 |            |
| ENSG00000105651 | CDHR5      | cadherin rela | 1.1245  | 3.18E-06 | 4.50E-05 | GO:0016020 |
| ENSG00000105651 | P2RY14     | purinergic r  | 2.423   | 3.32E-06 | 4.68E-05 | GO:0016020 |
| ENSG00000105651 | HIST1H2BI  | histone clus  | 2.1876  | 3.32E-06 | 4.68E-05 | GO:0005634 |
| ENSG00000105651 | PCDHGA10   | protocadher   | 1.4269  | 3.39E-06 | 4.76E-05 | GO:0016020 |
| ENSG00000105651 | LAGE3      | L antigen fa  | -1.0722 | 3.40E-06 | 4.78E-05 | GO:0005634 |
| ENSG00000105651 | NME3       | NME/NM23      | -1.2092 | 3.59E-06 | 5.02E-05 | GO:0046872 |
| ENSG00000105651 | MYO7B      | myosin VIIB   | -1.4534 | 3.59E-06 | 5.03E-05 | GO:0005737 |
| ENSG00000105651 | GAPDHP61   | glyceraldehy  | 2.6453  | 3.61E-06 | 5.04E-05 |            |
| ENSG00000105651 | ANGPTL3    | angiopoietin  | 1.6901  | 3.75E-06 | 5.22E-05 | GO:0005615 |
| ENSG00000105651 | AC131971.1 | novel transc  | 1.553   | 3.92E-06 | 5.43E-05 |            |
| ENSG00000105651 | AC130895.1 | novel transc  | 2.0772  | 3.94E-06 | 5.46E-05 |            |
| ENSG00000105651 | AC068025.2 | novel transc  | 1.6417  | 4.03E-06 | 5.58E-05 |            |
| ENSG00000105651 | LAMTOR5-1  | LAMTOR5 al    | 1.1534  | 4.06E-06 | 5.61E-05 |            |
| ENSG00000105651 | AC127024.8 | TEC           | 1.1571  | 4.10E-06 | 5.65E-05 |            |
| ENSG00000105651 | AC130650.2 | novel transc  | 1.3757  | 4.15E-06 | 5.72E-05 |            |
| ENSG00000105651 | BICRA-AS1  | BICRA antis   | 2.4922  | 4.16E-06 | 5.73E-05 |            |
| ENSG00000105651 | AC009948.5 | novel transc  | 2.5656  | 4.20E-06 | 5.78E-05 |            |
| ENSG00000105651 | HIST1H3B   | histone clus  | 2.5125  | 4.78E-06 | 6.51E-05 | GO:0005634 |
| ENSG00000105651 | BIRC6-AS2  | BIRC6 antis   | 2.0858  | 4.86E-06 | 6.61E-05 |            |
| ENSG00000105651 | FOS        | Fos proto-o   | -1.19   | 4.86E-06 | 6.61E-05 | GO:0007179 |
| ENSG00000105651 | C7orf31    | chromosom     | -1.0153 | 4.89E-06 | 6.65E-05 | GO:0005737 |
| ENSG00000105651 | CNTN2      | contactin 2   | 2.0834  | 4.96E-06 | 6.74E-05 | GO:0016020 |

|             |            |               |         |          |            |            |
|-------------|------------|---------------|---------|----------|------------|------------|
| ENSG000002  | AL117381.1 | novel transc  | 2.087   | 4.96E-06 | 6.74E-05   |            |
| ENSG000001  | ZNF660     | zinc finger p | 1.7762  | 5.01E-06 | 6.80E-05   | GO:0003676 |
| ENSG000001  | LRRC4      | leucine rich  | 1.6185  | 5.10E-06 | 6.92E-05   | GO:0016020 |
| ENSG000001  | LRRC20     | leucine rich  | -1.0309 | 5.23E-06 | 7.07E-05   | GO:0005515 |
| ENSG000002  | AL139317.5 | novel transc  | 1.7088  | 5.39E-06 | 7.27E-05   |            |
| ENSG000002  | AL133243.4 | TEC           | 1.5616  | 5.44E-06 | 7.34E-05   |            |
| ENSG000001  | TIGD5      | tigger transp | -1.0213 | 5.44E-06 | 7.34E-05   | GO:0003676 |
| ENSG000002  | AC022973.3 | novel transc  | 1.688   | 5.55E-06 | 7.46E-05   |            |
| ENSG000002  | AC092139.2 | novel transc  | 1.8848  | 5.73E-06 | 7.68E-05   |            |
| ENSG000002  | AC016727.3 | novel transc  | 1.403   | 5.92E-06 | 7.90E-05   |            |
| Novel.27423 | -          | -             | 1.8     | 6.08E-06 | 8.11E-05   |            |
| ENSG000002  | ZNF564     | zinc finger p | 1.3868  | 6.12E-06 | 8.14E-05   | GO:0003676 |
| ENSG000002  | RPL12P20   | ribosomal p   | 2.3302  | 6.23E-06 | 8.26E-05   |            |
| ENSG000002  | AL133284.1 | novel transc  | 2.4339  | 6.63E-06 | 8.74E-05   |            |
| ENSG000001  | UBE2Q2P1   | ubiquitin co  | 1.2417  | 6.68E-06 | 8.80E-05   |            |
| ENSG000002  | AC005920.2 | novel transc  | 1.9574  | 6.82E-06 | 8.97E-05   |            |
| ENSG000001  | SLC10A1    | solute carrie | 2.0449  | 6.85E-06 | 9.00E-05   | GO:0016020 |
| ENSG000001  | PSG9       | pregnancy s   | 1.0746  | 6.90E-06 | 9.04E-05   | GO:0005576 |
| ENSG000001  | NXPH4      | neurexophil   | -1.2552 | 6.94E-06 | 9.09E-05   | GO:0005576 |
| ENSG000002  | SERF1B     | small EDRK-   | -1.7747 | 6.99E-06 | 9.16E-05   | GO:0003674 |
| ENSG000001  | SPARCL1    | SPARC like 1  | 2.9718  | 7.06E-06 | 9.24E-05   | GO:0005615 |
| ENSG000002  | HSPD1P11   | heat shock p  | 1.3277  | 7.38E-06 | 9.62E-05   |            |
| ENSG000002  | ST7-AS2    | ST7 antisens  | 1.8809  | 7.46E-06 | 9.72E-05   |            |
| ENSG000001  | WNT7B      | Wnt family r  | -1.9433 | 7.59E-06 | 9.88E-05   | GO:0005102 |
| Novel.27450 | -          | -             | 3.6506  | 7.84E-06 | 0.00010169 |            |
| ENSG000001  | FAM19A2    | family with 5 | 1.7777  | 7.89E-06 | 0.0001022  | GO:0005737 |
| ENSG000002  | AC064874.1 | novel transc  | 2.5533  | 7.92E-06 | 0.00010259 |            |
| ENSG000001  | FAM20A     | FAM20A, gc    | 1.6471  | 7.98E-06 | 0.00010318 | GO:0005783 |
| ENSG000002  | AC092139.3 | novel transc  | 1.4078  | 8.11E-06 | 0.00010473 |            |
| ENSG000002  | HIST1H3I   | histone clus  | 2.1709  | 8.27E-06 | 0.0001066  | GO:0005634 |
| ENSG000002  | AC134349.2 | taste receptr | 2.0582  | 8.42E-06 | 0.00010837 |            |
| ENSG000001  | MEGF11     | multiple EGF  | 1.9091  | 8.48E-06 | 0.00010916 | GO:0016020 |
| ENSG000002  | PCDHGB7    | protocadher   | 2.2998  | 8.58E-06 | 0.00011028 | GO:0016020 |
| ENSG000001  | PANX2      | pannexin 2    | -1.1035 | 8.73E-06 | 0.00011202 | GO:0016020 |
| ENSG000001  | CXCL17     | C-X-C motif   | 2.0594  | 8.83E-06 | 0.0001131  | GO:0005515 |
| ENSG000002  | AC079915.1 | novel transc  | 1.4142  | 8.90E-06 | 0.00011394 |            |
| ENSG000002  | AC104332.1 | novel pseud   | 2.4594  | 8.94E-06 | 0.00011437 |            |
| ENSG000001  | ZNF460     | zinc finger p | 1.3123  | 9.09E-06 | 0.00011612 | GO:0003676 |
| ENSG000001  | TCEAL1     | transcriptior | -1.1311 | 9.16E-06 | 0.00011703 | GO:0005634 |
| ENSG000002  | MIR133A1H  | MIR133A1 h    | 1.734   | 9.18E-06 | 0.00011711 |            |
| Novel.5902  | -          | -             | 1.2922  | 9.18E-06 | 0.00011711 |            |
| ENSG000001  | TOX2       | TOX high m    | -1.1831 | 9.25E-06 | 0.00011788 | GO:0005634 |
| ENSG000002  | ERI3-IT1   | ERI3 intronic | 2.3133  | 9.28E-06 | 0.00011818 |            |
| ENSG000002  | AC087257.1 | novel transc  | 1.7866  | 9.36E-06 | 0.00011902 |            |
| ENSG000001  | C11orf65   | chromosom     | 1.3379  | 9.72E-06 | 0.00012337 | GO:0005515 |
| ENSG000001  | C1orf122   | chromosom     | -1.1842 | 9.83E-06 | 0.00012465 |            |
| ENSG000002  | AC016027.2 | novel transc  | 1.4798  | 1.00E-05 | 0.00012666 |            |
| ENSG000002  | AC234772.2 | novel transc  | 1.7555  | 1.07E-05 | 0.00013442 |            |

|            |            |               |         |          |            |            |
|------------|------------|---------------|---------|----------|------------|------------|
| ENSG000002 | AC021205.3 | novel transc  | 1.5094  | 1.11E-05 | 0.00013865 |            |
| ENSG000002 | AP002833.1 | novel transc  | 1.5624  | 1.13E-05 | 0.00014045 |            |
| ENSG000001 | KREMEN2    | kringle cont  | -1.444  | 1.13E-05 | 0.00014125 | GO:0016020 |
| ENSG000002 | AC103810.5 | novel transc  | 1.8114  | 1.14E-05 | 0.00014125 |            |
| ENSG000000 | ANGPT2     | angiopoietin  | 2.2882  | 1.18E-05 | 0.00014656 | GO:0046872 |
| ENSG000002 | AC133644.2 | novel transc  | 2.1029  | 1.19E-05 | 0.00014703 |            |
| ENSG000002 | AC009054.2 | novel transc  | 1.4585  | 1.19E-05 | 0.00014751 |            |
| ENSG000002 | AL353748.2 | developmer    | 2.8779  | 1.19E-05 | 0.00014791 |            |
| ENSG000002 | BACH1-IT1  | BACH1 intron  | 1.294   | 1.25E-05 | 0.00015447 |            |
| ENSG000002 | AL353804.1 | novel transc  | 1.632   | 1.28E-05 | 0.00015699 |            |
| ENSG000002 | AC005096.1 | novel transc  | 1.9129  | 1.28E-05 | 0.00015728 |            |
| ENSG000002 | AC063965.1 | novel transc  | 2.2414  | 1.30E-05 | 0.00015974 |            |
| ENSG000002 | CISD3      | CDGSH iron    | -1.019  | 1.34E-05 | 0.0001637  | GO:0046872 |
| ENSG000002 | PEG13      | paternally ex | 1.256   | 1.37E-05 | 0.00016674 |            |
| ENSG000002 | AL021328.1 | uncharacteri  | 2.5773  | 1.39E-05 | 0.00016949 |            |
| ENSG000002 | AL138828.1 | novel transc  | 1.5422  | 1.40E-05 | 0.00017015 |            |
| ENSG000002 | MIR1207    | microRNA 1    | 2.3694  | 1.41E-05 | 0.00017152 |            |
| ENSG000002 | RN7SL285P  | RNA, 7SL, cy  | 1.9575  | 1.47E-05 | 0.0001778  |            |
| ENSG000002 | AC105429.1 | novel transc  | 1.3307  | 1.49E-05 | 0.00018021 |            |
| ENSG000001 | ANGPTL7    | angiopoietin  | 2.1639  | 1.57E-05 | 0.00018897 | GO:0005515 |
| ENSG000002 | LBH        | limb bud an   | -1.3111 | 1.61E-05 | 0.00019325 | GO:0005634 |
| ENSG000002 | AC011451.2 | UBX domain    | 2.0494  | 1.72E-05 | 0.00020435 |            |
| ENSG000002 | AC007496.3 | novel transc  | 1.6455  | 1.75E-05 | 0.00020796 |            |
| ENSG000001 | ELAVL2     | ELAV like RN  | 1.2054  | 1.76E-05 | 0.00020898 | GO:0003676 |
| ENSG000002 | AC010320.4 | novel transc  | 3.1031  | 1.76E-05 | 0.00020946 |            |
| ENSG000002 | MIR181A1H  | MIR181A1 h    | 3.0915  | 1.77E-05 | 0.00020965 |            |
| ENSG000002 | AC010287.1 | chromosom     | 1.9369  | 1.78E-05 | 0.00021057 |            |
| ENSG000001 | CACNA2D4   | calcium volt  | -1.1779 | 1.80E-05 | 0.00021329 | GO:0016020 |
| ENSG000002 | AL513327.1 | novel transc  | 1.0164  | 1.81E-05 | 0.00021423 |            |
| ENSG000002 | AC023509.6 | -             | 2.0024  | 1.85E-05 | 0.00021876 |            |
| ENSG000002 | AC027288.1 | novel transc  | 2.8868  | 1.86E-05 | 0.00021974 |            |
| ENSG000002 | RN7SL128P  | RNA, 7SL, cy  | 2.2078  | 2.03E-05 | 0.00023765 |            |
| ENSG000002 | AC013394.1 | novel protei  | 1.7866  | 2.03E-05 | 0.00023765 |            |
| ENSG000002 | HIST1H4B   | histone clus  | 1.8916  | 2.07E-05 | 0.00024182 | GO:0003723 |
| ENSG000000 | PTPRN      | protein tyro  | -1.1621 | 2.12E-05 | 0.00024677 | GO:0005634 |
| ENSG000002 | BMS1P2     | BMS1, ribos   | 1.1137  | 2.14E-05 | 0.0002486  |            |
| ENSG000000 | MTMR7      | myotubulari   | 1.3162  | 2.24E-05 | 0.00025969 | GO:0005737 |
| ENSG000000 | SOX8       | SRY-box 8     | -1.0703 | 2.28E-05 | 0.00026393 | GO:0005634 |
| ENSG000002 | E2F3-IT1   | E2F3 intron   | 1.645   | 2.29E-05 | 0.00026525 |            |
| ENSG000001 | HACD4      | 3-hydroxyac   | 1.7709  | 2.42E-05 | 0.00027827 | GO:0016020 |
| ENSG000001 | ABHD11     | abhydrolase   | -1.1126 | 2.42E-05 | 0.00027861 | GO:0016787 |
| ENSG000001 | NMNAT2     | nicotinamid   | -1.1735 | 2.48E-05 | 0.00028448 | GO:0005737 |
| ENSG000002 | AC092910.1 | presenilin a  | 2.6207  | 2.60E-05 | 0.00029704 |            |
| ENSG000002 | AC092574.2 | novel transc  | 2.0299  | 2.60E-05 | 0.00029747 |            |
| ENSG000001 | FIBCD1     | fibrinogen C  | -1.1619 | 2.62E-05 | 0.0002992  | GO:0016020 |
| ENSG000001 | CORO1A     | coronin 1A    | -1.4567 | 2.62E-05 | 0.0002992  | GO:0051015 |
| ENSG000002 | AP002495.1 | Putative shc  | 1.0388  | 2.64E-05 | 0.00030114 | GO:0005634 |
| ENSG000002 | FAM204CP   | family with s | 3.9945  | 2.66E-05 | 0.00030345 |            |

|             |            |               |         |          |            |            |
|-------------|------------|---------------|---------|----------|------------|------------|
| ENSG000002  | PCDHA10    | protocadher   | 1.4345  | 2.70E-05 | 0.00030682 | GO:0016020 |
| ENSG000002  | AC079866.2 | novel transc  | 1.9553  | 2.70E-05 | 0.00030704 |            |
| ENSG000002  | AL024474.2 | novel transc  | 2.2243  | 2.72E-05 | 0.00030898 |            |
| ENSG000002  | AL132777.1 | MAD2 mitot    | 1.6712  | 2.74E-05 | 0.00031078 |            |
| ENSG000001  | BMPER      | BMP bindin    | -1.3159 | 2.79E-05 | 0.00031668 | GO:0005615 |
| ENSG000001  | CXCL8      | C-X-C motif   | -1.6111 | 2.84E-05 | 0.00032195 | GO:0005622 |
| ENSG000002  | AL138847.2 | novel transc  | 2.023   | 2.88E-05 | 0.00032603 |            |
| ENSG000001  | LYSMD2     | LysM domai    | -1.5326 | 2.89E-05 | 0.00032666 |            |
| Novel.21056 | -          | -             | 1.2355  | 2.92E-05 | 0.00033036 |            |
| ENSG000002  | TMLHE-AS1  | TMLHE antis   | 1.895   | 2.95E-05 | 0.00033317 |            |
| Novel.27426 | -          | -             | 6.1382  | 2.97E-05 | 0.00033485 |            |
| ENSG000002  | AC016590.2 | novel transc  | 1.5176  | 3.02E-05 | 0.00033969 |            |
| ENSG000002  | LINC01963  | long interge  | -1.0668 | 3.12E-05 | 0.00035054 |            |
| ENSG000002  | AC125611.2 | FGFR1 onco    | 1.5015  | 3.12E-05 | 0.00035073 |            |
| ENSG000002  | CHMP4BP1   | charged mu    | 1.5957  | 3.21E-05 | 0.00035981 |            |
| ENSG000002  | AC125612.1 | small nuclea  | 2       | 3.25E-05 | 0.00036442 |            |
| ENSG000002  | AL133444.1 | uncharacteri  | 1.6051  | 3.28E-05 | 0.00036758 |            |
| ENSG000002  | AC137055.1 | interferon ir | 1.6205  | 3.39E-05 | 0.00037769 |            |
| ENSG000002  | C3orf67-AS | C3orf67 anti  | 4.0001  | 3.53E-05 | 0.00039242 |            |
| ENSG000002  | SMAD1-AS2  | SMAD1 anti:   | 3.1041  | 3.59E-05 | 0.00039895 |            |
| ENSG000002  | KRTAP2-3   | keratin asso  | -3.685  | 3.68E-05 | 0.00040715 | GO:0005515 |
| ENSG000002  | AC131009.4 | novel transc  | 1.2759  | 3.72E-05 | 0.00041064 |            |
| ENSG000002  | AC006504.1 | novel transc  | 1.3128  | 3.74E-05 | 0.00041256 |            |
| ENSG000002  | BNIP3P11   | BCL2 interac  | 1.3438  | 3.74E-05 | 0.0004126  |            |
| ENSG000002  | AC013549.2 | novel transc  | 2.0428  | 3.77E-05 | 0.00041535 |            |
| ENSG000002  | AC021087.2 | novel transc  | 1.3341  | 3.83E-05 | 0.00042114 |            |
| ENSG000002  | DDX18P1    | DEAD-box h    | 1.5724  | 3.87E-05 | 0.00042478 |            |
| ENSG000002  | AC104162.2 | novel transc  | 1.2805  | 3.90E-05 | 0.00042757 |            |
| ENSG000001  | PALM3      | paralemmin    | -1.0509 | 3.94E-05 | 0.00043119 | GO:0005737 |
| ENSG000002  | FP236383.3 | novel transc  | 2.5457  | 4.05E-05 | 0.00044282 |            |
| ENSG000002  | FO680682.1 | novel transc  | 2.5812  | 4.13E-05 | 0.00045069 |            |
| ENSG000002  | BNIP3P40   | BCL2 interac  | 2.3069  | 4.21E-05 | 0.00045891 |            |
| ENSG000002  | AL139274.1 | novel TWIST   | 1.9733  | 4.27E-05 | 0.00046535 |            |
| ENSG000001  | PRSS48     | serine prote  | 1.3711  | 4.28E-05 | 0.00046642 | GO:0016787 |
| ENSG000002  | SETP10     | SET pseudo    | 2.3623  | 4.28E-05 | 0.00046655 |            |
| ENSG000002  | AC008147.4 | novel pseuc   | 2.0725  | 4.30E-05 | 0.00046755 |            |
| ENSG000002  | AL139294.1 | novel transc  | 2.5448  | 4.37E-05 | 0.00047517 |            |
| ENSG000002  | TATDN2P2   | TatD DNase    | 1.2201  | 4.39E-05 | 0.0004769  |            |
| ENSG000002  | Z97198.1   | novel transc  | 1.3652  | 4.40E-05 | 0.00047796 |            |
| ENSG000001  | ARHGDI     | Rho GDP dis   | -1.1044 | 4.43E-05 | 0.00048011 | GO:0005737 |
| ENSG000001  | GPX2       | glutathione   | 1.4997  | 4.43E-05 | 0.00048026 | GO:0055114 |
| ENSG000002  | SNX18P3    | sorting nexi  | 1.0313  | 4.45E-05 | 0.00048197 |            |
| ENSG000002  | MTND5P26   | MT-ND5 pse    | 2.5678  | 4.56E-05 | 0.00049198 |            |
| ENSG000002  | AL138689.2 | novel transc  | 1.8145  | 4.56E-05 | 0.00049211 |            |
| Novel.15561 | -          | -             | -1.0594 | 4.58E-05 | 0.00049425 |            |
| ENSG000002  | CERS1      | ceramide syn  | -1.1024 | 4.61E-05 | 0.00049686 | GO:0016020 |
| ENSG000002  | AP000577.1 | TEC           | 1.7839  | 4.67E-05 | 0.00050186 |            |
| ENSG000002  | AL049637.1 | uncharacteri  | 1.656   | 4.70E-05 | 0.0005051  |            |

|             |            |               |         |          |            |            |
|-------------|------------|---------------|---------|----------|------------|------------|
| ENSG000002  | AF127577.2 | novel transc  | 1.8339  | 4.73E-05 | 0.0005076  |            |
| ENSG000002  | ZNF75BP    | zinc finger p | 2.8733  | 4.79E-05 | 0.00051301 |            |
| ENSG000002  | ZBED3-AS1  | ZBED3 antis   | 1.1891  | 4.80E-05 | 0.00051388 |            |
| ENSG000002  | AC010200.1 | phosphatidy   | 1.419   | 4.94E-05 | 0.00052593 |            |
| ENSG000002  | AC104984.3 | novel transc  | 1.7931  | 4.95E-05 | 0.00052739 |            |
| ENSG000001  | SMIM29     | small integr  | -1.0085 | 4.99E-05 | 0.00053133 | GO:0016020 |
| ENSG000002  | CLIP1-AS1  | CLIP1 antise  | 1.4642  | 5.02E-05 | 0.00053373 |            |
| ENSG000001  | MAPK15     | mitogen-acti  | -1.3694 | 5.03E-05 | 0.00053487 | GO:0005634 |
| ENSG000001  | DCHS1      | dachsous ca   | -1.0023 | 5.19E-05 | 0.00055035 | GO:0005622 |
| ENSG000002  | RPS20P15   | ribosomal p   | 2.207   | 5.20E-05 | 0.0005512  |            |
| ENSG000002  | AC016027.3 | novel transc  | 1.7364  | 5.23E-05 | 0.00055329 |            |
| ENSG000002  | AC108688.1 | DnaJ (Hsp4C   | 2.2406  | 5.25E-05 | 0.00055499 |            |
| ENSG000002  | TYW1B      | tRNA-yW sy    | 1.2588  | 5.32E-05 | 0.00056152 | GO:0016020 |
| ENSG000002  | MTCYBP18   | MT-CYB pse    | 2.5996  | 5.33E-05 | 0.00056316 |            |
| ENSG000002  | AL450226.1 | uncharacteri  | 2.7047  | 5.40E-05 | 0.00056907 |            |
| ENSG000002  | RF00424    | -             | 5.9304  | 5.40E-05 | 0.00056951 |            |
| ENSG000002  | CEACAMP1C  | carcinoembr   | 1.0651  | 5.46E-05 | 0.00057513 |            |
| ENSG000002  | AC087392.3 | novel transc  | 1.5105  | 5.50E-05 | 0.00057813 |            |
| ENSG000002  | HNRNPA1P   | heterogeneo   | 1.6164  | 5.52E-05 | 0.00058029 |            |
| Novel.2742E | -          | -             | 2.9575  | 5.52E-05 | 0.00058042 |            |
| ENSG000002  | RNU6-711P  | RNA, U6 sm    | 2.4038  | 5.53E-05 | 0.00058147 |            |
| ENSG000002  | AL645568.1 | uncharacteri  | 1.6583  | 5.63E-05 | 0.00059    |            |
| ENSG000002  | KRT18P57   | keratin 18 p  | 2.341   | 5.67E-05 | 0.00059421 |            |
| ENSG000002  | KNOP1P2    | lysine rich n | 1.9678  | 5.71E-05 | 0.00059737 |            |
| ENSG000002  | AC011815.1 | novel transc  | 1.5433  | 5.82E-05 | 0.00060777 |            |
| ENSG000002  | AC097493.2 | ribosomal p   | 1.9019  | 6.00E-05 | 0.000624   |            |
| ENSG000002  | KANSL1-AS  | KANSL1 ant    | 1.8497  | 6.07E-05 | 0.0006303  |            |
| ENSG000002  | AC016590.1 | novel transc  | 1.5187  | 6.11E-05 | 0.00063428 |            |
| ENSG000002  | AL162578.1 | ribosomal p   | 2.1641  | 6.16E-05 | 0.00063952 |            |
| ENSG000002  | AC008895.1 | TEC           | 1.2893  | 6.21E-05 | 0.00064394 |            |
| ENSG000002  | AC011447.5 | BCL2/adenc    | 2.4651  | 6.36E-05 | 0.00065888 |            |
| Novel.17494 | -          | -             | 2.4898  | 6.59E-05 | 0.0006793  |            |
| ENSG000002  | ANKRD44-F  | ANKRD44 in    | 2.0385  | 6.63E-05 | 0.00068216 |            |
| ENSG000002  | AC027018.1 | novel transc  | 2.1112  | 6.96E-05 | 0.00071322 |            |
| ENSG000001  | RGPD5      | RANBP2-lik    | 1.2095  | 6.98E-05 | 0.00071546 | GO:0005737 |
| ENSG000002  | PTTG4P     | pituitary tur | 2.4786  | 7.18E-05 | 0.00073368 |            |
| ENSG000002  | PLCE1-AS1  | PLCE1 antis   | 2.3401  | 7.24E-05 | 0.00073892 |            |
| ENSG000001  | TMEM200A   | transmembr    | -1.1384 | 7.26E-05 | 0.00074031 | GO:0016020 |
| ENSG000001  | LIF        | LIF, interleu | -1.0075 | 7.30E-05 | 0.000744   | GO:0005615 |
| ENSG000001  | SRP72P2    | signal recog  | 2.1239  | 7.37E-05 | 0.00074952 |            |
| ENSG000002  | AC005072.1 | novel transc  | 1.2822  | 7.45E-05 | 0.00075726 |            |
| ENSG000002  | AL096869.1 | novel transc  | 4.2085  | 7.48E-05 | 0.00076019 |            |
| ENSG000002  | AL590762.4 | pseudogene    | 2.1164  | 7.52E-05 | 0.00076345 |            |
| ENSG000002  | LINC02595  | long interge  | 2.1795  | 7.70E-05 | 0.00077948 |            |
| ENSG000001  | LRRC19     | leucine rich  | 1.5416  | 7.73E-05 | 0.00078236 | GO:0016020 |
| ENSG000002  | AL512326.1 | UDP-Gal:be    | 1.9699  | 7.80E-05 | 0.00078877 |            |
| ENSG000002  | AC083964.2 | TEC           | 1.9718  | 7.97E-05 | 0.00080472 |            |
| ENSG000002  | PRR13P1    | proline rich  | 2.6758  | 8.13E-05 | 0.00081986 |            |

|             |            |               |         |            |            |            |
|-------------|------------|---------------|---------|------------|------------|------------|
| ENSG000001  | ZFH2-AS1   | ZFH2 antis    | 1.3417  | 8.17E-05   | 0.0008234  |            |
| ENSG000002  | AL353804.2 | novel transc  | 1.7262  | 8.19E-05   | 0.00082557 |            |
| ENSG000001  | ASB18      | ankyrin repe  | 1.449   | 8.20E-05   | 0.00082615 | GO:0016567 |
| ENSG000002  | SMC5-AS1   | SMC5 antise   | 1.7103  | 8.25E-05   | 0.00083005 |            |
| ENSG000002  | USP17L7    | ubiquitin sp  | 4.7956  | 8.27E-05   | 0.00083153 | GO:0005634 |
| ENSG000002  | MTCO1P28   | MT-CO1 pse    | 1.3301  | 8.46E-05   | 0.00085009 |            |
| ENSG000002  | AC012618.2 | ribosomal p   | 1.4529  | 8.53E-05   | 0.00085629 |            |
| Novel.7366  | -          | -             | 1.9909  | 8.59E-05   | 0.00086176 |            |
| ENSG000002  | EIF2S2P5   | eukaryotic ti | 3.2367  | 8.70E-05   | 0.0008713  |            |
| Novel.5901  | -          | -             | 1.3662  | 8.75E-05   | 0.00087535 |            |
| ENSG000002  | TCEA1P4    | transcriptior | 1.9109  | 8.76E-05   | 0.00087577 |            |
| ENSG000002  | AC022973.1 | ribosomal p   | 2.6716  | 8.77E-05   | 0.0008765  |            |
| ENSG000002  | DIP2A-IT1  | DIP2A intror  | 1.3046  | 8.85E-05   | 0.00088386 |            |
| ENSG000002  | AF107885.2 | novel transc  | 1.5327  | 8.86E-05   | 0.00088402 |            |
| ENSG000002  | AC022022.2 | leucine rich  | 2.4003  | 9.13E-05   | 0.00090825 |            |
| ENSG000002  | AC002429.2 | novel transc  | 2.3338  | 9.17E-05   | 0.00091059 |            |
| ENSG000002  | AC009245.1 | ribosomal p   | -1.0618 | 9.16E-05   | 0.00091059 |            |
| ENSG000002  | AC015845.1 | novel transc  | 2.0851  | 9.21E-05   | 0.00091409 |            |
| ENSG000002  | MFSD1P1    | major facilit | 1.5879  | 9.36E-05   | 0.00092756 |            |
| ENSG000002  | MTRNR2L4   | MT-RNR2 lil   | 1.2234  | 9.42E-05   | 0.00093291 | GO:0005737 |
| ENSG000002  | AC012568.1 | novel transc  | 1.9784  | 9.47E-05   | 0.0009371  |            |
| ENSG000002  | AC131571.1 | novel transc  | 2.1414  | 9.51E-05   | 0.00093927 |            |
| ENSG000001  | ARSI       | arylsulfatase | -1.0478 | 9.67E-05   | 0.0009525  | GO:0046872 |
| ENSG000002  | AC092135.1 | novel transc  | 2.5645  | 9.79E-05   | 0.0009635  |            |
| ENSG000001  | INHBE      | inhibin subt  | -1.2402 | 9.86E-05   | 0.00096967 | GO:0008083 |
| ENSG000002  | AC097493.1 | ribosomal p   | 2.3613  | 9.98E-05   | 0.00097912 |            |
| ENSG000002  | AC241520.1 | zinc finger p | 2.4307  | 9.98E-05   | 0.00097912 |            |
| ENSG000001  | HMCN1      | hemicentin    | 1.5649  | 9.98E-05   | 0.00097918 | GO:0005737 |
| ENSG000002  | AC105235.1 | TEC           | 1.4393  | 0.00010149 | 0.00099387 |            |
| ENSG000002  | PHBP12     | prohibitin p  | 1.8162  | 0.00010212 | 0.00099929 |            |
| ENSG000002  | AC089984.2 | MRS2 magn     | 1.9027  | 0.00010358 | 0.0010124  |            |
| ENSG000002  | AL138820.1 | novel transc  | 1.9924  | 0.00010431 | 0.0010191  |            |
| ENSG000002  | AC110813.1 | uncharacteri  | 2.357   | 0.00010523 | 0.0010266  |            |
| ENSG000002  | RPL3P6     | ribosomal p   | 1.6195  | 0.0001069  | 0.0010412  |            |
| ENSG000001  | ARMC5      | armadillo re  | -1.0451 | 0.00010717 | 0.0010436  | GO:0005829 |
| ENSG000002  | LRRRC69    | leucine rich  | 1.2465  | 0.00010927 | 0.0010613  |            |
| ENSG000002  | AC079866.1 | CTAGE famil   | 1.7097  | 0.00010989 | 0.0010666  |            |
| ENSG000001  | C2CD6      | C2 calcium c  | 1.9091  | 0.00010994 | 0.0010667  | GO:0005515 |
| ENSG000002  | AC091057.4 | novel transc  | 1.3743  | 0.00011061 | 0.0010723  |            |
| ENSG000001  | RAB20      | RAB20, mer    | -1.5479 | 0.00011294 | 0.0010929  | GO:0016020 |
| ENSG000002  | AC004865.1 | zinc finger p | 2.3844  | 0.00011313 | 0.0010944  |            |
| ENSG000002  | CEBPD      | CCAAT enh     | -1.2092 | 0.00011696 | 0.0011284  | GO:0005634 |
| ENSG000001  | HIST1H4C   | histone dls   | 1.9171  | 0.00011884 | 0.0011444  | GO:0003723 |
| ENSG000001  | RTN2       | reticulon 2   | -1.2002 | 0.0001199  | 0.0011537  | GO:0016020 |
| ENSG000002  | DIAPH3-AS2 | DIAPH3 anti   | 1.9816  | 0.0001207  | 0.0011608  |            |
| ENSG000002  | RPS3AP14   | ribosomal p   | 4.137   | 0.00012128 | 0.001166   |            |
| Novel.2742E | -          | -             | 2.5143  | 0.0001222  | 0.0011736  |            |
| ENSG000001  | STX19      | syntaxin 19   | 1.8899  | 0.00012311 | 0.0011807  | GO:0005737 |

|                      |                |         |            |           |            |
|----------------------|----------------|---------|------------|-----------|------------|
| ENSG000002AC114402.2 | SNF7 domai     | 2.1532  | 0.00012364 | 0.0011849 |            |
| ENSG000001ARC        | activity regu  | -2.6547 | 0.00012659 | 0.0012093 | GO:0003723 |
| ENSG000001OR2AK2     | olfactory rec  | 3.7757  | 0.0001276  | 0.0012186 | GO:0016020 |
| ENSG000002RN7SL4P    | RNA, 7SL, cy   | 1.8547  | 0.00012764 | 0.0012187 |            |
| ENSG000002AC027763.1 | Spi-C transc   | 2.5747  | 0.00012895 | 0.0012299 |            |
| ENSG000002RF00212    | small nuclec   | 3.1817  | 0.00013254 | 0.0012616 |            |
| ENSG000002AL049539.1 | novel transc   | 2.3046  | 0.00013311 | 0.0012665 |            |
| ENSG000002AC037487.1 | novel transc   | 2.2034  | 0.00013486 | 0.0012822 |            |
| ENSG000002AL139039.2 | ribosomal p    | 2.909   | 0.00013523 | 0.0012847 |            |
| ENSG000002SETP5      | SET pseudoq    | 1.8915  | 0.00013639 | 0.0012943 |            |
| ENSG000002RPS27AP12  | ribosomal p    | 1.8109  | 0.00013716 | 0.0013009 |            |
| ENSG000001PTPRN2     | protein tyro   | -1.4752 | 0.00013779 | 0.0013058 | GO:0016020 |
| ENSG000002AL133370.1 | novel transc   | 1.7501  | 0.00013812 | 0.0013083 |            |
| ENSG000002RSF1-IT2   | RSF1 introni   | 2.4782  | 0.00014118 | 0.001334  |            |
| Novel.2739E -        | -              | -1.3113 | 0.0001414  | 0.0013354 |            |
| ENSG000002AC005343.1 | novel transc   | 1.254   | 0.0001426  | 0.0013457 |            |
| ENSG000002KRR1P1     | KRR1, small    | 1.7005  | 0.00014349 | 0.0013527 |            |
| ENSG000002CDC42EP3P1 | CDC42 effec    | 4.1588  | 0.00014427 | 0.001359  |            |
| ENSG000002EEF1A1P25  | eukaryotic ti  | 2.3054  | 0.00014467 | 0.001362  |            |
| ENSG000001ROGDI      | rogdi homo     | -1.0706 | 0.00014471 | 0.001362  | GO:0005634 |
| ENSG000001PDZK1      | PDZ domair     | 1.1821  | 0.00014565 | 0.0013698 | GO:0016020 |
| ENSG000002AC011379.1 | novel transc   | 1.9     | 0.0001468  | 0.0013785 |            |
| ENSG000002AL359094.1 | novel transc   | 2.0652  | 0.00014918 | 0.001399  |            |
| ENSG000001CRYAB      | crystallin alç | -1.5468 | 0.00014949 | 0.0014011 | GO:0005634 |
| ENSG000002ATP1B1P1   | ATPase Na+     | 2.8948  | 0.00014966 | 0.0014024 |            |
| ENSG000001DUSP9      | dual specific  | -1.5672 | 0.00015012 | 0.0014057 | GO:0005737 |
| ENSG000002AL731563.3 | novel transc   | 1.1397  | 0.00015013 | 0.0014057 |            |
| ENSG000002AC021205.1 | ribosomal p    | 1.9075  | 0.00015021 | 0.0014061 |            |
| ENSG000002AC008507.2 | novel transc   | 2.2421  | 0.00015214 | 0.0014226 |            |
| ENSG000001LRRN3      | leucine rich   | 1.7933  | 0.00015326 | 0.001432  | GO:0016020 |
| Novel.27422 -        | -              | 1.5222  | 0.00015334 | 0.001432  |            |
| ENSG000001MLPH       | melanophili    | -1.1798 | 0.00015518 | 0.0014454 | GO:0005622 |
| ENSG000002AC091925.2 | TEC            | 3.0186  | 0.00015518 | 0.0014454 |            |
| ENSG000002AC005921.3 | TEC            | 1.1861  | 0.0001561  | 0.0014521 |            |
| ENSG000002AC005692.1 | novel transc   | 5.8393  | 0.00016145 | 0.0014952 |            |
| ENSG000001RNF113A    | ring finger ç  | -1.1266 | 0.00016191 | 0.0014984 | GO:0046872 |
| ENSG000002AC073575.1 | novel transc   | 1.7375  | 0.00016213 | 0.0014996 |            |
| ENSG000001GPR183     | G protein-α    | 2.0496  | 0.0001621  | 0.0014996 | GO:0016020 |
| ENSG000002AC027627.1 | novel transc   | 1.4141  | 0.00016506 | 0.001522  |            |
| ENSG000002USP3-AS1   | USP3 antisei   | 1.2901  | 0.00016535 | 0.0015243 |            |
| ENSG000002HSD17B8    | hydroxyster    | -1.138  | 0.00016819 | 0.0015477 | GO:0016491 |
| ENSG000002AL831737.1 | ribosomal p    | 2.6355  | 0.00016957 | 0.0015576 |            |
| ENSG000002RNU4-9P    | RNA, U4 sm     | 2.5526  | 0.00017803 | 0.001629  |            |
| ENSG000002ATP5PDP4   | ATP synthas    | 1.3524  | 0.00018048 | 0.0016484 |            |
| ENSG000002AL080317.1 | novel transc   | 1.3646  | 0.0001817  | 0.0016575 |            |
| ENSG000002MAPT-IT1   | MAPT intror    | 2.2465  | 0.00018279 | 0.0016661 |            |
| ENSG000002AL139128.1 | proteasome     | 1.8921  | 0.00018324 | 0.0016682 |            |
| ENSG000002AL449283.1 | GAJ protein    | 1.6367  | 0.00018404 | 0.0016741 |            |



|            |            |                |         |            |           |            |
|------------|------------|----------------|---------|------------|-----------|------------|
| ENSG000002 | AL158801.1 | ribosomal p    | 1.6903  | 0.00018449 | 0.0016779 |            |
| ENSG000002 | AL031668.1 | novel transc   | 2.1577  | 0.00018693 | 0.0016957 |            |
| ENSG000002 | RNU1-106P  | RNA, U1 sm     | 1.0689  | 0.00019255 | 0.0017431 |            |
| ENSG000001 | EVA1B      | eva-1 homc     | -1.0239 | 0.00019481 | 0.0017601 | GO:0016020 |
| ENSG000002 | AC068620.3 | novel Myb/     | 1.7941  | 0.00019913 | 0.0017946 |            |
| ENSG000002 | AC090833.1 | uncharacteri   | -1.1016 | 0.00019929 | 0.0017955 |            |
| ENSG000002 | AL133370.2 | zinc finger p  | 2.2819  | 0.00020107 | 0.0018089 |            |
| ENSG000002 | AL079343.1 | novel transc   | 1.2818  | 0.00020119 | 0.0018095 |            |
| ENSG000002 | RPL9P32    | ribosomal p    | 2.339   | 0.00020213 | 0.0018175 |            |
| ENSG000001 | ITGAX      | integrin sub   | -1.4708 | 0.00020234 | 0.001819  | GO:0016020 |
| ENSG000002 | AL513523.1 | adipose diff   | 1.423   | 0.00020372 | 0.00183   |            |
| ENSG000002 | AC245884.8 | novel transc   | 2.0931  | 0.00020391 | 0.0018312 |            |
| ENSG000002 | AC092120.1 | novel transc   | 2.7104  | 0.00020684 | 0.0018543 |            |
| ENSG000002 | RF00017    | -              | 4.0325  | 0.00020885 | 0.0018704 |            |
| ENSG000002 | AC011939.2 | novel transc   | 2.6744  | 0.0002102  | 0.0018811 |            |
| ENSG000002 | KCTD9P5    | potassium c    | 2.6644  | 0.00021147 | 0.001892  |            |
| ENSG000002 | PTPN2P1    | protein tyro   | 1.8654  | 0.00021296 | 0.0019048 |            |
| ENSG000002 | AC092364.2 | cyclin Y like  | 1.5994  | 0.00021362 | 0.0019093 |            |
| ENSG000002 | AC009464.1 | novel transc   | 3.0426  | 0.00021434 | 0.0019153 |            |
| ENSG000002 | GK3P       | glycerol kin   | 3.462   | 0.00021637 | 0.001932  | GO:0005737 |
| ENSG000002 | NPY6R      | neuropeptic    | 2.4421  | 0.00021715 | 0.001937  |            |
| ENSG000001 | MDFI       | MyoD family    | -1.0734 | 0.00021745 | 0.0019387 | GO:0005634 |
| ENSG000002 | BNIP3P42   | BCL2 interac   | 2.1325  | 0.0002196  | 0.0019564 |            |
| ENSG000001 | DLL1       | delta like cal | -1.0514 | 0.00022025 | 0.0019618 | GO:0045944 |
| ENSG000002 | MIR548K    | microRNA 5     | 3.4924  | 0.00022119 | 0.0019696 |            |
| ENSG000001 | CBR3       | carbonyl rec   | -1.2412 | 0.00022134 | 0.0019704 | GO:0005737 |
| ENSG000002 | AC134349.1 | novel transc   | 2.7192  | 0.00022372 | 0.0019881 |            |
| ENSG000002 | CBARP      | CACN subur     | -1.2304 | 0.00022423 | 0.0019917 | GO:0016020 |
| ENSG000001 | OTUD4P1    | OTUD4 pseu     | 3.1912  | 0.00022728 | 0.0020148 |            |
| ENSG000002 | RF00066    | -              | 2.2174  | 0.00023011 | 0.0020369 |            |
| ENSG000002 | AC104984.6 | novel transc   | 1.5298  | 0.00023027 | 0.0020378 |            |
| ENSG000001 | MMP24      | matrix metal   | 1.3004  | 0.0002319  | 0.0020497 | GO:0016020 |
| ENSG000002 | RNU7-175P  | RNA, U7 sm     | 5.6249  | 0.00023256 | 0.002055  |            |
| ENSG000002 | CYP2T1P    | cytochrome     | 1.1665  | 0.00023706 | 0.0020927 |            |
| ENSG000002 | HNRNPDLP   | heterogene     | 3.3862  | 0.00023771 | 0.002098  |            |
| ENSG000002 | AC007731.4 | novel transc   | 1.7003  | 0.00023918 | 0.0021098 |            |
| ENSG000002 | RF00019    | -              | 3.0963  | 0.00023927 | 0.0021101 |            |
| ENSG000002 | AC002558.1 | ribosomal p    | 1.0569  | 0.00023964 | 0.0021129 |            |
| ENSG000002 | DANT2      | DXZ4 associ    | 1.3542  | 0.00024181 | 0.0021294 |            |
| ENSG000002 | RHEBP3     | RHEB pseud     | 2.2928  | 0.00024582 | 0.0021605 |            |
| ENSG000002 | MAGI1-IT1  | MAGI1 intro    | 2.1829  | 0.00024965 | 0.0021892 |            |
| ENSG000002 | AC027796.5 | novel transc   | 2.1231  | 0.00025367 | 0.0022202 |            |
| ENSG000002 | AC139451.1 | PHD finger p   | 2.0703  | 0.00025452 | 0.0022271 |            |
| ENSG000002 | AC073529.1 | novel transc   | 1.3195  | 0.00025549 | 0.0022344 |            |
| ENSG000002 | AC008649.2 | novel transc   | 1.9606  | 0.00025565 | 0.0022354 |            |
| ENSG000002 | AC109597.1 | uncharacteri   | 1.7387  | 0.00025778 | 0.0022523 |            |
| ENSG000002 | MIR548I2   | microRNA 5     | 2.5867  | 0.00026331 | 0.0022934 |            |
| ENSG000001 | DLEU2L     | deleted in ly  | 1.3488  | 0.00026551 | 0.0023108 |            |

|             |            |               |         |            |           |            |
|-------------|------------|---------------|---------|------------|-----------|------------|
| ENSG000002  | PFN1P1     | profilin 1 ps | -1.546  | 0.00026792 | 0.0023296 |            |
| ENSG000002  | RF00017    | -             | 1.6719  | 0.00026851 | 0.0023341 |            |
| ENSG000002  | RTL1       | retrotransp   | 1.0783  | 0.0002688  | 0.0023355 | GO:0016020 |
| ENSG000002  | HIST1H2AH  | histone clus  | 2.1895  | 0.00026886 | 0.0023355 | GO:0005634 |
| ENSG000002  | AC132068.1 | novel transc  | 3.1793  | 0.00026924 | 0.0023382 |            |
| ENSG000002  | PSG8-AS1   | PSG8 antisel  | 1.663   | 0.00027041 | 0.0023467 |            |
| ENSG000002  | AL139022.1 | uncharacteri  | 1.1034  | 0.00027744 | 0.0024036 |            |
| ENSG000002  | AC090971.3 | Leo1, Paf1/F  | 1.432   | 0.00027808 | 0.0024079 |            |
| ENSG000002  | COX6CP13   | cytochrome    | 5.1603  | 0.00027907 | 0.0024159 |            |
| ENSG000002  | AC107982.2 | novel transc  | 2.3923  | 0.00028015 | 0.0024225 |            |
| Novel.28377 | -          | -             | 3.973   | 0.00028084 | 0.0024277 |            |
| ENSG000002  | AL162253.1 | novel transc  | 5.5799  | 0.0002836  | 0.0024486 |            |
| ENSG000002  | GP6        | glycoproteir  | 1.4555  | 0.00028457 | 0.0024558 | GO:0016020 |
| ENSG000002  | PCDHGB5    | protocadher   | 1.7807  | 0.00029158 | 0.0025112 | GO:0016020 |
| ENSG000002  | AC022080.3 | mitochondri   | 2.1149  | 0.00029318 | 0.002521  |            |
| ENSG000002  | AL359697.1 | novel transc  | 2.8051  | 0.00029513 | 0.0025341 |            |
| ENSG000002  | MTND5P2    | MT-ND5 pse    | 3.4314  | 0.00029759 | 0.0025546 |            |
| ENSG000002  | AC023090.2 | TEC           | 1.7003  | 0.00029785 | 0.0025562 |            |
| ENSG000002  | Z95152.1   | nudix (nude   | 1.1374  | 0.0002984  | 0.0025604 |            |
| ENSG000002  | SCARNA9    | small Cajal b | 1.6669  | 0.00029879 | 0.0025625 |            |
| ENSG000002  | AC093567.1 | novel transc  | 2.7425  | 0.00030201 | 0.002587  |            |
| ENSG000002  | AGGF1P3    | angiogenic i  | 2.6221  | 0.00030393 | 0.0026023 |            |
| ENSG000002  | LARGE-AS1  | LARGE antis   | 1.6421  | 0.00030442 | 0.002604  |            |
| ENSG000002  | AC087893.1 | novel transc  | 1.8367  | 0.00031115 | 0.0026564 |            |
| ENSG000002  | AC024451.4 | novel transc  | 1.2572  | 0.00031337 | 0.0026745 |            |
| ENSG000002  | CYP2S1     | cytochrome    | -1.7908 | 0.00031463 | 0.0026829 | GO:0016020 |
| ENSG000002  | AL590627.1 | forkhead bc   | 1.1021  | 0.00031523 | 0.0026874 |            |
| ENSG000002  | AC092747.2 | liprin-beta-  | 2.3205  | 0.00031677 | 0.0026986 |            |
| ENSG000002  | LRRC4B     | leucine rich  | -1.1231 | 0.00031861 | 0.002713  | GO:0016020 |
| ENSG000002  | C20orf144  | chromosom     | 2.1784  | 0.00032048 | 0.0027257 |            |
| ENSG000002  | KIRREL3-AS | KIRREL3 ant   | 1.5036  | 0.00032237 | 0.0027378 |            |
| ENSG000002  | ELOCP33    | elongin C ps  | 2.6469  | 0.00032363 | 0.0027473 |            |
| ENSG000002  | SNRPGP10   | small nuclea  | -1.7008 | 0.00032455 | 0.0027544 |            |
| ENSG000002  | AL590762.3 | MADP-1 prc    | 1.8515  | 0.00032557 | 0.0027611 |            |
| ENSG000002  | AC096564.1 | uncharacteri  | 2.321   | 0.0003273  | 0.0027745 |            |
| ENSG000002  | CEACAMP7   | carcinoembr   | 5.5877  | 0.00032822 | 0.0027809 |            |
| ENSG000002  | WASHC5-AS  | WASHC5 an     | 1.2159  | 0.00033086 | 0.0028013 |            |
| ENSG000002  | RN7SL568P  | RNA, 7SL, cy  | 2.4447  | 0.00033358 | 0.002821  |            |
| ENSG000002  | LINC01085  | long interge  | -1.0854 | 0.00033572 | 0.0028378 |            |
| ENSG000002  | AC024267.4 | uncharacteri  | 2.0276  | 0.0003399  | 0.002871  |            |
| ENSG000002  | AC100763.1 | novel transc  | 2.0131  | 0.00035411 | 0.0029806 |            |
| ENSG000002  | LINC01537  | long interge  | -1.7461 | 0.00035492 | 0.0029867 |            |
| ENSG000002  | RNU6-1322  | RNA, U6 sm    | 2.8307  | 0.00035753 | 0.0030065 |            |
| ENSG000002  | CCDC38     | coiled-coil c | 2.3765  | 0.00035844 | 0.0030128 | GO:0005737 |
| ENSG000002  | RNU1-87P   | RNA, U1 sm    | 2.3421  | 0.00036051 | 0.0030287 |            |
| ENSG000002  | C6orf163   | chromosom     | 1.0495  | 0.00036148 | 0.0030354 | GO:0003674 |
| ENSG000002  | AC007496.1 | novel transc  | 2.077   | 0.00036303 | 0.0030458 |            |
| ENSG000002  | RF00019    | -             | 1.734   | 0.00036629 | 0.0030701 |            |

|             |            |               |         |            |           |            |
|-------------|------------|---------------|---------|------------|-----------|------------|
| ENSG000002  | UBE2FP1    | UBE2F pseud   | 1.5519  | 0.00036862 | 0.003086  |            |
| ENSG000002  | PCDHA4     | protocadher   | 1.4065  | 0.00037128 | 0.0031047 | GO:0016020 |
| ENSG000002  | AC090953.1 | THAP doma     | 2.1449  | 0.00037164 | 0.003107  |            |
| ENSG000001  | KLC3       | kinesin light | -1.2207 | 0.00037249 | 0.0031133 | GO:0003777 |
| ENSG000002  | LINC01004  | long interge  | 1.2968  | 0.00037346 | 0.0031195 |            |
| ENSG000002  | AP003108.4 | novel transc  | 1.8568  | 0.00037957 | 0.0031666 |            |
| ENSG000002  | AC063960.2 | novel transc  | 2.3406  | 0.00038361 | 0.0031958 |            |
| ENSG000002  | AL162171.3 | novel transc  | 1.4462  | 0.0003854  | 0.0032092 |            |
| ENSG000002  | ETF1P2     | eukaryotic ti | 1.4459  | 0.00039293 | 0.0032697 |            |
| ENSG000002  | AL096869.2 | uncharacteri  | 2.7638  | 0.00039401 | 0.0032771 |            |
| ENSG000002  | AC015971.1 | novel transc  | 1.573   | 0.00039521 | 0.0032841 |            |
| ENSG000002  | AC022079.1 | novel transc  | 1.9458  | 0.00039575 | 0.003287  |            |
| ENSG000002  | COL6A6     | collagen typ  | 2.0385  | 0.00039875 | 0.0033104 | GO:0007155 |
| ENSG000002  | AC093225.1 | novel zinc fi | 2.3286  | 0.00039923 | 0.0033128 |            |
| ENSG000002  | AL591623.1 | novel transc  | 1.7891  | 0.00039959 | 0.0033147 |            |
| ENSG000002  | AC087521.2 | novel transc  | 1.3446  | 0.00040134 | 0.0033273 |            |
| ENSG000002  | AC001226.2 | novel protei  | 1.6584  | 0.00040805 | 0.0033781 | GO:0005764 |
| ENSG000002  | LINC01943  | long interge  | 1.8118  | 0.00041025 | 0.0033933 |            |
| ENSG000002  | AC093591.2 | novel transc  | 1.7203  | 0.0004128  | 0.0034121 |            |
| ENSG000002  | RNU6-595P  | RNA, U6 sm    | 3.1398  | 0.00041507 | 0.0034276 |            |
| ENSG000002  | AC024451.1 | ribosomal p   | 1.9759  | 0.00041653 | 0.0034373 |            |
| ENSG000002  | SARNP      | SAP domain    | 1.2375  | 0.00041738 | 0.0034436 | GO:0003723 |
| ENSG000002  | POU5F1P5   | POU class 5   | 1.5436  | 0.00041804 | 0.0034481 |            |
| ENSG000002  | AC022872.1 | novel transc  | 1.9725  | 0.00042188 | 0.0034743 |            |
| ENSG000002  | AL512604.1 | ribosomal p   | 2.0216  | 0.00042417 | 0.0034915 |            |
| ENSG000002  | AL590556.1 | ribosomal p   | 3.3428  | 0.00042517 | 0.0034982 |            |
| Novel.26203 | -          | -             | -2.3316 | 0.00042528 | 0.0034983 |            |
| ENSG000002  | AL589986.2 | novel transc  | 2.4878  | 0.00042941 | 0.003529  |            |
| ENSG000002  | AC009054.1 | novel transc  | 1.5161  | 0.00042932 | 0.003529  |            |
| ENSG000001  | FAM186A    | family with 5 | 1.2453  | 0.0004365  | 0.0035782 |            |
| ENSG000002  | AC068587.2 | 40S ribosom   | 2.042   | 0.00043944 | 0.0035982 |            |
| ENSG000001  | HLX        | H2.0 like ho  | -1.0456 | 0.00044632 | 0.0036487 | GO:0005634 |
| ENSG000002  | RF00017    | -             | 2.5254  | 0.00044767 | 0.0036589 |            |
| ENSG000001  | FAM156B    | family with 5 | 2.4352  | 0.00045664 | 0.0037254 | GO:0035064 |
| ENSG000002  | HNRNPA1P1  | heterogene    | 1.7693  | 0.00045773 | 0.0037309 |            |
| ENSG000001  | ESR2       | estrogen rec  | 1.2812  | 0.00045956 | 0.0037441 | GO:0005634 |
| ENSG000002  | AL031705.1 | novel transc  | 2.3897  | 0.00046094 | 0.0037536 |            |
| ENSG000002  | AC009269.2 | novel transc  | 1.6777  | 0.00046259 | 0.0037627 |            |
| ENSG000001  | TTYH1      | tweety famil  | 1.2278  | 0.00046268 | 0.0037627 | GO:0016020 |
| ENSG000002  | H2AFZP1    | H2A histone   | 2.0656  | 0.00046482 | 0.0037766 |            |
| ENSG000002  | MANEA-DT   | MANEA div     | 2.466   | 0.00046691 | 0.0037927 |            |
| ENSG000001  | ESPNL      | espin like    | -1.9416 | 0.00046719 | 0.0037942 | GO:0003779 |
| ENSG000002  | AC138866.1 | glucuronida   | 1.1963  | 0.0004676  | 0.0037967 |            |
| ENSG000002  | SND1-IT1   | SND1 intron   | 1.1857  | 0.00046824 | 0.003801  |            |
| ENSG000002  | AL136984.1 | novel transc  | 1.6488  | 0.00046922 | 0.0038081 |            |
| ENSG000002  | MRTFA-AS1  | MRTFA antis   | 1.2256  | 0.00047193 | 0.0038266 |            |
| ENSG000001  | PKD2L2     | polycystin 2  | 1.6199  | 0.00047395 | 0.0038404 | GO:0016020 |
| ENSG000002  | AL121978.1 | microtubule   | 2.9536  | 0.00047479 | 0.0038463 |            |

|            |            |              |         |            |           |            |
|------------|------------|--------------|---------|------------|-----------|------------|
| ENSG000002 | ODCP       | ornithine de | 1.4776  | 0.00047773 | 0.003864  |            |
| ENSG000002 | AC032044.2 | TEC          | 1.8982  | 0.0004779  | 0.0038645 |            |
| ENSG000002 | AC092653.2 | TEC          | 2.4428  | 0.00048122 | 0.0038879 |            |
| ENSG000002 | TATDN1P1   | TatD DNase   | 1.982   | 0.00048749 | 0.0039322 |            |
| ENSG000002 | SRRM1P3    | serine/argin | 1.3033  | 0.00048776 | 0.0039327 |            |
| ENSG000002 | AC016727.1 | novel transc | 1.1653  | 0.00049352 | 0.0039747 |            |
| ENSG000001 | ACSBG2     | acyl-CoA sy  | 1.0646  | 0.00049762 | 0.0040041 | GO:0003824 |
| ENSG000002 | AC079601.2 | fragile X me | 1.7352  | 0.00050322 | 0.0040446 |            |
| ENSG000001 | LRRC70     | leucine rich | 3.1367  | 0.00050673 | 0.0040692 | GO:0016020 |
| ENSG000001 | SLC4A5     | solute carri | 1.8719  | 0.00050733 | 0.0040731 | GO:0016020 |
| ENSG000002 | HIST1H2AJ  | histone clus | 2.0251  | 0.00051031 | 0.0040952 | GO:0005634 |
| ENSG000002 | AIMP1P2    | aminoacyl tl | 1.6702  | 0.00051094 | 0.0040993 |            |
| ENSG000002 | AL139120.1 | novel transc | 2.1524  | 0.00051352 | 0.0041173 |            |
| ENSG000002 | MTND1P8    | MT-ND1 pse   | 1.3062  | 0.00051791 | 0.0041469 |            |
| ENSG000002 | AC010480.1 | TEC          | 2.6972  | 0.00052137 | 0.0041718 |            |
| ENSG000001 | PTGIR      | prostagland  | -1.0103 | 0.00052491 | 0.0041954 | GO:0048662 |
| ENSG000002 | AGAP1-IT1  | AGAP1 intrc  | 1.4589  | 0.00053468 | 0.004264  |            |
| ENSG000002 | AC067817.1 | novel transc | 2.0355  | 0.00053788 | 0.0042885 |            |
| ENSG000002 | RGS5       | regulator of | 1.1242  | 0.00053942 | 0.0042989 |            |
| ENSG000002 | AC009716.2 | TEC          | 4.4149  | 0.00054366 | 0.0043279 |            |
| ENSG000002 | SNORA46    | small nuclec | 1.7561  | 0.00054835 | 0.0043633 |            |
| ENSG000002 | TIMM9P2    | TIMM9 pseu   | 2.1701  | 0.00055214 | 0.0043896 |            |
| ENSG000002 | HDAC2-AS2  | HDAC2 and    | 1.3055  | 0.00055846 | 0.0044299 |            |
| ENSG000002 | RPS3AP44   | ribosomal p  | 4.4068  | 0.00056158 | 0.0044518 |            |
| ENSG000002 | AC016493.1 | uncharacteri | 2.3187  | 0.00056288 | 0.0044601 |            |
| ENSG000002 | AC092338.1 | novel transc | 2.2031  | 0.00056931 | 0.0045041 |            |
| ENSG000002 | TLL7-IT1   | TLL7 intror  | 2.2921  | 0.00057072 | 0.0045141 |            |
| ENSG000002 | WVOX-AS1   | WVOX anti:   | 2.4919  | 0.00057105 | 0.0045141 |            |
| ENSG000002 | AC004943.3 | novel transc | 2.2462  | 0.00057209 | 0.0045211 |            |
| ENSG000002 | AC233702.7 | novel transc | 1.8797  | 0.00057601 | 0.0045471 |            |
| ENSG000002 | AC083806.2 | novel transc | 1.8442  | 0.00057783 | 0.0045594 |            |
| ENSG000002 | AC097638.1 | ribosomal p  | 3.2717  | 0.00058405 | 0.0046044 |            |
| ENSG000002 | AC138028.2 | uncharacteri | 1.165   | 0.0005886  | 0.0046321 |            |
| ENSG000002 | BNIP3P37   | BCL2 interac | 1.9472  | 0.00059564 | 0.0046814 |            |
| ENSG000002 | AC016542.3 | TEC          | 2.1274  | 0.00060722 | 0.0047629 |            |
| ENSG000002 | RNU6-875P  | RNA, U6 sm   | 1.2032  | 0.00061031 | 0.0047809 |            |
| ENSG000002 | HSPE1P27   | heat shock p | 1.6091  | 0.00061446 | 0.0048102 |            |
| ENSG000000 | KCNH2      | potassium v  | -1.1926 | 0.00061703 | 0.0048283 | GO:0048471 |
| ENSG000002 | RAD17P2    | RAD17 ched   | 1.9592  | 0.00062306 | 0.0048691 |            |
| ENSG000002 | KRT18P31   | keratin 18 p | 1.5751  | 0.00062602 | 0.004888  |            |
| ENSG000002 | AC004637.1 | novel transc | 2.322   | 0.00062869 | 0.0049066 |            |
| ENSG000002 | AC023389.2 | RNA termin:  | 1.3738  | 0.0006312  | 0.0049252 |            |
| ENSG000002 | AC146507.2 | ribosomal p  | 2.8219  | 0.00063511 | 0.0049524 |            |
| ENSG000002 | AC023590.1 | uncharacteri | 2.3481  | 0.0006435  | 0.0050114 |            |
| ENSG000001 | HES6       | hes family b | -1.2039 | 0.00065308 | 0.0050804 | GO:0005634 |
| ENSG000002 | RN7SL502P  | RNA, 7SL, c  | 2.5789  | 0.00065424 | 0.0050872 |            |
| ENSG000002 | RF00100    | -            | 2.884   | 0.00065439 | 0.0050873 |            |
| ENSG000001 | RNA5SP93   | RNA, 5S ribc | 3.2588  | 0.00066217 | 0.0051433 |            |

|                      |               |         |            |           |            |
|----------------------|---------------|---------|------------|-----------|------------|
| ENSG000002AC253536.3 | novel transc  | 1.369   | 0.00066743 | 0.0051785 |            |
| ENSG000001HSD11B1L   | hydroxyster   | -1.3481 | 0.00067055 | 0.0052016 | GO:0043231 |
| ENSG000002RN7SL329P  | RNA, 7SL, cy  | 1.3979  | 0.00067265 | 0.0052141 |            |
| ENSG000001RF00019    | -             | 3.5197  | 0.00067675 | 0.0052416 |            |
| ENSG000002AL445305.1 | adaptor-rel   | 2.4406  | 0.00068902 | 0.0053218 |            |
| ENSG000001LHFPL1     | LHFPL tetra   | 5.3796  | 0.00069531 | 0.0053647 | GO:0016020 |
| ENSG000002RWDD4P1    | RWD domai     | 1.0968  | 0.00069547 | 0.0053647 |            |
| ENSG000002AC096741.1 | novel transc  | 1.7313  | 0.00069611 | 0.0053662 |            |
| ENSG000002AC010632.2 | novel transc  | 2.2792  | 0.00070007 | 0.0053932 |            |
| ENSG000002RBMS3-AS2  | RBMS3 antis   | 1.4844  | 0.00070189 | 0.0054015 |            |
| ENSG000001HIST1H1A   | histone clus  | 2.8625  | 0.00070429 | 0.0054188 | GO:0005634 |
| ENSG000001FGF22      | fibroblast gr | 2.1342  | 0.00070648 | 0.0054321 | GO:0008083 |
| ENSG000001RNA5SP195  | RNA, 5S ribc  | 1.7019  | 0.00070698 | 0.0054325 |            |
| ENSG000002WASF3-AS1  | WASF3 antis   | 2.2164  | 0.00070873 | 0.0054424 |            |
| ENSG000002AC007064.2 | novel transc  | 1.7759  | 0.00070958 | 0.0054477 |            |
| ENSG000002AL354943.1 | transmembr    | 2.2708  | 0.00071177 | 0.0054623 |            |
| ENSG000002AC009549.1 | novel transc  | -1.1758 | 0.00071178 | 0.0054623 |            |
| ENSG000002AP000560.1 | TEC           | 1.2262  | 0.00071206 | 0.0054633 |            |
| ENSG000002AC090559.2 | novel transc  | 1.4189  | 0.00071429 | 0.0054783 |            |
| ENSG000002AC007161.1 | ribosomal p   | 2.7615  | 0.00071815 | 0.0055041 |            |
| ENSG000002AC007319.1 | novel transc  | 1.1196  | 0.00071895 | 0.0055081 |            |
| ENSG000002AC120349.1 | novel transc  | 2.3456  | 0.00071907 | 0.0055081 |            |
| ENSG000002AL136304.1 | novel transc  | 2.4816  | 0.00072024 | 0.0055143 |            |
| ENSG000002RPSAP13    | ribosomal p   | 1.729   | 0.00072084 | 0.0055177 |            |
| ENSG000002AC007038.1 | novel transc  | 1.4743  | 0.00072767 | 0.0055564 |            |
| ENSG000002AL117379.1 | novel transc  | 1.4269  | 0.00073041 | 0.0055806 |            |
| ENSG000002AC110048.2 | novel transc  | 1.0458  | 0.00073605 | 0.0056197 |            |
| ENSG000002AL354890.1 | ACN9 homc     | 3.5294  | 0.00074269 | 0.005668  |            |
| ENSG000002AC090617.7 | novel transc  | 2.1845  | 0.00074315 | 0.0056703 |            |
| ENSG000002AC017002.3 | uncharacteri  | 2.4375  | 0.00075759 | 0.0057677 |            |
| ENSG000002AC000120.1 | novel transc  | 1.4343  | 0.00076462 | 0.0058155 |            |
| ENSG000002MIR648     | microRNA 6    | 2.0754  | 0.00076512 | 0.005818  |            |
| ENSG000002AP003696.1 | novel transc  | 2.1512  | 0.00076689 | 0.0058289 |            |
| ENSG000002AC104819.1 | trypsin dom   | 1.4837  | 0.00076882 | 0.0058391 |            |
| ENSG000002AC019226.1 | TEC           | 1.9064  | 0.00077841 | 0.0059016 |            |
| ENSG000002RN7SL220P  | RNA, 7SL, cy  | 1.4663  | 0.00077982 | 0.0059098 |            |
| ENSG000002AL022323.2 | novel transc  | 1.6611  | 0.0007806  | 0.0059132 |            |
| ENSG000002AC113155.1 | NSA2 ribosc   | 3.0965  | 0.00078643 | 0.005951  |            |
| ENSG000002UBE2CP1    | ubiquitin co  | 1.93    | 0.00078722 | 0.0059552 |            |
| ENSG000001MAPK10     | mitogen-ac    | 1.0585  | 0.00079284 | 0.0059911 | GO:0005622 |

|                      |               |             |                          |           |            |
|----------------------|---------------|-------------|--------------------------|-----------|------------|
| rylation;tran        | hsa:5602      | hsa01522;hs | Endocrine resistance ;MA | 59.83     | 28.63      |
| ENSG000002SNX6P1     | sorting nexin | 1.8885      | 0.00079927               | 0.0060342 |            |
| ENSG000002AL353662.1 | ribosomal p   | 1.8876      | 0.0008011                | 0.0060455 |            |
| ENSG000001DEPP1      | DEPP1, autc   | -1.2536     | 0.00080617               | 0.0060812 | GO:0005737 |
| ENSG000002AL137779.3 | nucleophosi   | 4.3391      | 0.00080672               | 0.006084  |            |
| ENSG000002MTATP6P19  | MT-ATP6 ps    | 2.725       | 0.00080838               | 0.0060897 |            |

|             |             |               |         |            |           |            |
|-------------|-------------|---------------|---------|------------|-----------|------------|
| ENSG000002  | DLGAP4-AS   | DLGAP4 ant    | 1.5752  | 0.00080849 | 0.0060897 |            |
| ENSG000002  | RF00019     | -             | 1.8897  | 0.00080904 | 0.0060925 |            |
| ENSG000001  | CCNB3       | cyclin B3     | 1.9391  | 0.00081279 | 0.0061161 | GO:0005634 |
| ENSG000002  | AC104046.1  | fatty acid bi | 2.1609  | 0.00081285 | 0.0061161 |            |
| ENSG000002  | AC010442.1  | mitochondri   | 2.3827  | 0.00081677 | 0.0061404 |            |
| ENSG000002  | AC006460.1  | novel transc  | 3.7663  | 0.00081878 | 0.0061517 |            |
| ENSG000002  | AC129502.1  | TEC           | 2.0029  | 0.00082241 | 0.0061763 |            |
| ENSG000002  | AC104791.1  | novel transc  | 3.2396  | 0.00083655 | 0.0062734 |            |
| ENSG000002  | MIR2052HG   | MIR2052 ho:   | 5.4234  | 0.00083729 | 0.0062769 |            |
| ENSG000002  | HYMAI       | hydatidiforr  | 1.0731  | 0.00083877 | 0.006286  |            |
| ENSG000001  | MFSD3       | major facilit | -1.0123 | 0.00084212 | 0.0063058 | GO:0016020 |
| ENSG000001  | WNT4        | Wnt family r  | 1.6607  | 0.00084802 | 0.0063435 | GO:0045669 |
| ENSG000002  | AC007849.1  | novel transc  | 2.4716  | 0.00084823 | 0.0063435 |            |
| ENSG000002  | RPL26P19    | ribosomal p   | -1.1415 | 0.00084819 | 0.0063435 |            |
| ENSG000002  | AL365436.1  | ribosomal p   | 2.3911  | 0.00084979 | 0.006351  |            |
| ENSG000002  | AC244093.4  | novel transc  | 1.8591  | 0.00084991 | 0.006351  |            |
| ENSG000002  | AC103769.1  | novel transc  | 1.5751  | 0.00085623 | 0.0063928 |            |
| ENSG000002  | ASTN2-AS1   | ASTN2 antis   | 2.5616  | 0.00085831 | 0.006407  |            |
| ENSG000002  | AC079193.2  | novel transc  | 2.1301  | 0.00086338 | 0.0064409 |            |
| ENSG000002  | AC022173.1  | uncharacteri  | 1.7329  | 0.00086593 | 0.0064585 |            |
| ENSG000001  | SCG2        | secretogran   | 1.1162  | 0.0008726  | 0.0065042 | GO:2000352 |
| ENSG000002  | AL109613.1  | novel transc  | 1.0677  | 0.00088961 | 0.0066214 |            |
| ENSG000002  | KIRREL1-IT1 | KIRREL1 intr  | 1.4932  | 0.000905   | 0.0067179 |            |
| ENSG000002  | AC092120.2  | cytidine mol  | 1.5981  | 0.00090497 | 0.0067179 |            |
| Novel.26501 | -           | -             | -3.0927 | 0.00090659 | 0.0067281 |            |
| ENSG000002  | KRT18P60    | keratin 18 p  | 2.975   | 0.00090773 | 0.0067338 |            |
| ENSG000002  | TNPO1P1     | transportin   | 1.7096  | 0.00090991 | 0.0067446 |            |
| ENSG000001  | GNG13       | G protein su  | 1.4774  | 0.00091902 | 0.0068049 | GO:0016020 |
| ENSG000002  | ALOX12P2    | arachidonat   | 1.0055  | 0.00092556 | 0.0068476 |            |
| ENSG000002  | RNU6-787P   | RNA, U6 sm    | 5.3194  | 0.0009329  | 0.0068963 |            |
| ENSG000002  | GAS6-DT     | GAS6 diverg   | -1.7252 | 0.00093283 | 0.0068963 |            |
| ENSG000002  | KRT18P18    | keratin 18 p  | 5.3007  | 0.00093682 | 0.0069181 |            |
| ENSG000002  | AC008592.2  | novel transc  | 3.8149  | 0.00093726 | 0.0069199 |            |
| ENSG000001  | RANBP3L     | RAN binding   | 1.5108  | 0.00093852 | 0.0069278 | GO:0005634 |
| ENSG000001  | NME9        | NME/NM23      | 1.3449  | 0.00093891 | 0.0069293 | GO:0005737 |
| ENSG000002  | AC131934.1  | novel transc  | 1.5085  | 0.0009398  | 0.0069344 |            |
| ENSG000002  | AL356057.1  | LSM14A, SC    | 2.0049  | 0.00094356 | 0.0069607 |            |
| ENSG000002  | AP003110.1  | uncharacteri  | 2.5891  | 0.00094741 | 0.0069862 |            |
| ENSG000002  | RPS2P55     | ribosomal p   | -1.9019 | 0.00094933 | 0.0069975 |            |
| ENSG000002  | AP006259.1  | novel transc  | 1.5987  | 0.00095591 | 0.0070373 |            |
| ENSG000002  | AC106873.1  | novel transc  | 1.7265  | 0.00095944 | 0.0070604 |            |
| ENSG000002  | AC019072.1  | protein tyro  | 2.9088  | 0.00097542 | 0.0071603 |            |
| ENSG000002  | AC090971.5  | novel transc  | 3.4152  | 0.00098247 | 0.0072047 |            |
| ENSG000002  | RLIMP1      | ring finger p | 2.3678  | 0.0009847  | 0.0072167 |            |
| ENSG000002  | AC079753.1  | TEC           | 1.3161  | 0.00098689 | 0.0072312 |            |
| ENSG000002  | FP236383.2  | novel transc  | 3.6063  | 0.00099556 | 0.0072901 |            |
| ENSG000002  | RF00019     | -             | 2.4046  | 0.00099694 | 0.0072959 |            |
| ENSG000002  | SERPINH1P1  | serpin famili | 2.171   | 0.0010067  | 0.0073581 |            |

|            |            |               |         |           |           |            |
|------------|------------|---------------|---------|-----------|-----------|------------|
| ENSG000002 | AC135782.3 | novel transc  | 2.0725  | 0.0010164 | 0.0074197 |            |
| ENSG000002 | AL391421.1 | novel transc  | 1.926   | 0.0010219 | 0.0074569 |            |
| ENSG000002 | AC023509.5 | zinc finger p | 1.9284  | 0.0010234 | 0.0074654 |            |
| ENSG000002 | AC003989.1 | pseudogene    | 2.5484  | 0.0010284 | 0.0074989 |            |
| ENSG000001 | HIST4H4    | histone clus  | 1.7224  | 0.0010317 | 0.0075207 | GO:0003723 |
| ENSG000001 | MYOT       | myotilin      | 1.3839  | 0.0010329 | 0.007527  | GO:0030018 |
| ENSG000002 | RNU6-789P  | RNA, U6 sm    | 2.4247  | 0.0010387 | 0.0075676 |            |
| ENSG000002 | COX6CP1    | cytochrome    | 1.3446  | 0.0010506 | 0.0076431 |            |
| ENSG000002 | AC080188.2 | TEC           | 2.1537  | 0.0010618 | 0.0077201 |            |
| ENSG000002 | ATP11A-AS  | ATP11A anti   | 1.8204  | 0.0010683 | 0.0077564 |            |
| ENSG000002 | DIO1       | iodothyroni   | 1.2865  | 0.0010699 | 0.0077647 | GO:0016491 |
| ENSG000002 | AL583856.1 | spermine sy   | -1.4758 | 0.001072  | 0.0077768 |            |
| ENSG000002 | TPM3P1     | tropomyosin   | 2.486   | 0.0010838 | 0.0078592 |            |
| ENSG000002 | POC1B-AS1  | POC1B antis   | 1.1419  | 0.0010852 | 0.0078675 |            |
| ENSG000002 | CBWD4P     | COBW domi     | 1.3305  | 0.001092  | 0.007914  |            |
| ENSG000002 | RNU6-1023P | RNA, U6 sm    | 5.3517  | 0.0010936 | 0.0079242 |            |
| ENSG000002 | CASS4      | Cas scaffold  | -1.0226 | 0.0011017 | 0.0079778 | GO:0005737 |
| ENSG000002 | AC005042.1 | ribosomal p   | 2.1098  | 0.0011038 | 0.0079868 |            |
| ENSG000002 | AC080013.1 | novel transc  | 1.1372  | 0.0011041 | 0.0079868 |            |
| ENSG000002 | MIR548U    | microRNA 5    | 2.5028  | 0.0011053 | 0.0079941 |            |
| ENSG000001 | CHRN2      | cholinergic r | 2.1547  | 0.0011234 | 0.0081139 | GO:0016020 |
| ENSG000002 | CRLF1      | cytokine rec  | -1.0723 | 0.0011304 | 0.0081629 | GO:0008284 |
| ENSG000002 | AC016245.1 | uncharacteri  | 1.885   | 0.0011322 | 0.0081742 |            |
| ENSG000002 | AL445435.1 | sorting nexin | 2.1679  | 0.0011364 | 0.0081994 |            |
| ENSG000002 | ITPK1-AS1  | ITPK1 antise  | 1.6655  | 0.0011387 | 0.0082143 |            |
| ENSG000001 | RF00019    | -             | 3.3537  | 0.0011651 | 0.0083927 |            |
| ENSG000001 | COL10A1    | collagen typ  | 1.9331  | 0.0011674 | 0.0084053 | GO:0046872 |
| ENSG000002 | DCDC2B     | doublecortin  | 1.5018  | 0.0011683 | 0.0084088 | GO:0035556 |
| ENSG000002 | PCDHGA12   | protocadher   | 1.7897  | 0.0011714 | 0.008428  | GO:0016020 |
| ENSG000002 | ATP2A1-AS  | ATP2A1 anti   | -1.4019 | 0.0011746 | 0.0084409 |            |
| ENSG000002 | AC007151.1 | developmer    | 2.1413  | 0.0011771 | 0.0084573 |            |
| ENSG000002 | AL022097.1 | uncharacteri  | 1.8383  | 0.0011904 | 0.0085422 |            |
| ENSG000001 | FAM83A     | family with s | -1.32   | 0.0012016 | 0.0086145 | GO:0005737 |
| ENSG000002 | Z98885.3   | novel transc  | 1.4429  | 0.001219  | 0.0087256 |            |
| ENSG000002 | AC090220.1 | novel transc  | 2.4004  | 0.0012199 | 0.0087295 |            |
| ENSG000002 | AL121652.1 | novel transc  | 3.1455  | 0.001235  | 0.0088269 |            |
| ENSG000002 | EIPR1-IT1  | EIPR1 intron  | 2.2685  | 0.001243  | 0.0088805 |            |
| ENSG000002 | IQCJ-SCHIP | IQCJ-SCHIP    | 2.5892  | 0.0012456 | 0.008896  |            |
| ENSG000002 | RNU4-54P   | RNA, U4 sm    | 3.3699  | 0.0012474 | 0.0089068 |            |
| ENSG000002 | AC022080.1 | TAF10 RNA     | 2.1427  | 0.0012561 | 0.008961  |            |
| ENSG000002 | RGS17P1    | regulator of  | 5.2534  | 0.0012576 | 0.0089671 |            |
| ENSG000002 | AC068580.4 | novel protei  | 1.9895  | 0.0012628 | 0.008999  | GO:0016020 |
| ENSG000002 | C8orf17    | chromosom     | 1.7048  | 0.0012655 | 0.0090128 |            |
| ENSG000002 | PTPRJ-AS1  | PTPRJ antise  | 1.6837  | 0.0012671 | 0.009022  |            |
| ENSG000002 | MPRIP-AS1  | MPRIP antis   | 2.0056  | 0.0012769 | 0.0090852 |            |
| ENSG000002 | AL020995.1 | novel transc  | 1.9202  | 0.0012779 | 0.0090905 |            |
| ENSG000002 | FTH1P4     | ferritin heav | 1.6008  | 0.0012814 | 0.0091096 |            |
| ENSG000002 | AC009269.5 | novel transc  | 1.4091  | 0.0012814 | 0.0091096 |            |

|            |            |                |         |           |           |            |
|------------|------------|----------------|---------|-----------|-----------|------------|
| ENSG000001 | ZNF29P     | zinc finger p  | 2.3732  | 0.0012824 | 0.0091149 |            |
| ENSG000001 | PTPRQ      | protein tyro   | 1.1455  | 0.001284  | 0.0091247 | GO:0016787 |
| ENSG000002 | AC002543.1 | novel pseud    | 1.8329  | 0.0012846 | 0.009127  |            |
| ENSG000002 | PCDHGB9P   | protocadher    | 1.6752  | 0.0012855 | 0.00913   |            |
| ENSG000002 | TVP23CP1   | TVP23C pse     | 2.6402  | 0.0012869 | 0.0091345 |            |
| ENSG000002 | AC005520.1 | novel transc   | 2.0086  | 0.0012868 | 0.0091345 |            |
| ENSG000002 | AC004158.1 | novel transc   | 1.2103  | 0.0012965 | 0.0091936 |            |
| ENSG000001 | CMYA5      | cardiomyop     | 1.7717  | 0.0013005 | 0.0092161 | GO:0005634 |
| ENSG000002 | AC020763.3 | novel transc   | 1.1317  | 0.0013013 | 0.0092201 |            |
| ENSG000001 | SNORC      | secondary o    | 1.3746  | 0.0013052 | 0.0092443 | GO:0005737 |
| ENSG000002 | RAD51AP1P  | RAD51 asso     | 2.4616  | 0.0013092 | 0.0092686 |            |
| ENSG000002 | AC079140.1 | novel pseud    | 2.9049  | 0.0013119 | 0.0092842 |            |
| ENSG000002 | TSEN15P2   | tRNA splicin   | 2.3869  | 0.0013212 | 0.0093427 |            |
| ENSG000002 | AC092127.2 | novel transc   | 2.4622  | 0.0013224 | 0.0093489 |            |
| ENSG000001 | AMZ1       | archaelysin    | 1.3799  | 0.0013281 | 0.00938   | GO:0008270 |
| ENSG000002 | RPS10P3    | ribosomal p    | -2.4504 | 0.0013421 | 0.0094699 |            |
| ENSG000002 | AC007014.1 | novel transc   | 2.2808  | 0.001351  | 0.0095254 |            |
| ENSG000002 | AP004289.1 | aconitase 2,   | 2.7783  | 0.0013759 | 0.0096763 |            |
| ENSG000002 | CYCSP29    | cytochrome     | 5.2173  | 0.0013767 | 0.0096798 |            |
| ENSG000001 | CRYM-AS1   | CRYM antise    | 1.1837  | 0.0013792 | 0.0096952 |            |
| ENSG000002 | AC114878.1 | pseudogene     | 4.1479  | 0.0013891 | 0.0097497 |            |
| ENSG000002 | CDC42-IT1  | CDC42 intro    | 1.4188  | 0.0013935 | 0.0097738 |            |
| ENSG000002 | AC012513.2 | heterogene     | 1.4459  | 0.0014133 | 0.0099    |            |
| ENSG000002 | ENPP7P12   | ectonucleoti   | 1.8571  | 0.0014193 | 0.00993   |            |
| ENSG000001 | PTGS2      | prostagland    | -1.2859 | 0.0014209 | 0.0099376 | GO:0090050 |
| ENSG000002 | AC004461.2 | DiGeorge sy    | 1.763   | 0.0014289 | 0.0099861 |            |
| ENSG000002 | AL356599.1 | uncharacteri   | 1.0349  | 0.0014461 | 0.0101    |            |
| ENSG000001 | PPL        | periplakin     | 1.2135  | 0.0014515 | 0.010132  | GO:0005634 |
| ENSG000002 | ATP6V0E1P1 | ATPase H+ t    | 2.3717  | 0.0014584 | 0.010174  |            |
| ENSG000002 | TYRO3P     | TYRO3P pro     | 1.5997  | 0.0014739 | 0.010274  |            |
| ENSG000002 | SMG6-IT1   | SMG6 intror    | 2.5965  | 0.0014763 | 0.010289  |            |
| ENSG000002 | RPL23AP53  | ribosomal p    | 1.1379  | 0.0014769 | 0.010291  |            |
| ENSG000002 | PCCA-AS1   | PCCA antise    | 1.6563  | 0.0014777 | 0.010294  |            |
| ENSG000002 | RPL23AP23  | ribosomal p    | 2.2106  | 0.001486  | 0.010347  |            |
| ENSG000002 | AC100850.1 | clathrin, ligh | 3.6716  | 0.0014898 | 0.010365  |            |
| ENSG000002 | RF00019    | -              | 3.6398  | 0.0014915 | 0.010375  |            |
| ENSG000002 | PHACTR2-A  | PHACTR2 ar     | 1.6289  | 0.001497  | 0.010409  |            |
| ENSG000002 | AC009163.3 | novel transc   | 1.504   | 0.0015034 | 0.01045   |            |
| ENSG000001 | HIST1H2BL  | histone clus   | 1.5134  | 0.0015065 | 0.010465  | GO:0005634 |
| ENSG000002 | AL357552.2 | novel transc   | 2.076   | 0.001507  | 0.010467  |            |
| ENSG000002 | AC008764.1 | TEC            | 1.6399  | 0.0015081 | 0.010472  |            |
| ENSG000002 | LATS2-AS1  | LATS2 antise   | 1.4374  | 0.0015244 | 0.010579  |            |
| ENSG000001 | FZD8       | frizzled class | -1.0228 | 0.0015308 | 0.010615  | GO:0016020 |
| ENSG000002 | RPSAP21    | ribosomal p    | 3.6453  | 0.0015404 | 0.010667  |            |
| ENSG000002 | AC073592.7 | novel transc   | 2.2381  | 0.0015406 | 0.010667  |            |
| ENSG000001 | ATXN7      | ataxin 7       | 1.0524  | 0.0015438 | 0.010686  | GO:0005634 |
| ENSG000002 | AGGF1P1    | angiogenic     | 1.3813  | 0.001556  | 0.010759  |            |
| ENSG000001 | LRFN1      | leucine rich   | -1.4251 | 0.0015593 | 0.010779  | GO:0016020 |



|             |            |                |         |           |          |            |
|-------------|------------|----------------|---------|-----------|----------|------------|
| ENSG000001  | COL18A1-A  | COL18A1 an     | 1.3678  | 0.0015645 | 0.010809 |            |
| ENSG000002  | AC124916.2 | ribosomal p    | 1.3849  | 0.0015719 | 0.010854 |            |
| ENSG000002  | AL031770.1 | novel transc   | 1.5057  | 0.0015786 | 0.010889 |            |
| ENSG000002  | BACH1-IT2  | BACH1 intrc    | 1.3672  | 0.0016051 | 0.011055 |            |
| ENSG000002  | MIR454     | microRNA 4     | 1.648   | 0.0016101 | 0.011088 | GO:0005615 |
| ENSG000001  | C9orf131   | chromosom      | 1.9255  | 0.0016187 | 0.011136 |            |
| ENSG000002  | VPS26BP1   | VPS26B pset    | 1.4935  | 0.00163   | 0.011201 |            |
| ENSG000001  | BDKRB1     | bradykinin r   | -1.0435 | 0.0016301 | 0.011201 | GO:0016020 |
| ENSG000002  | PRH1       | proline rich   | 1.3978  | 0.0016522 | 0.011336 |            |
| ENSG000002  | RF00410    | -              | 1.5299  | 0.0016537 | 0.011342 |            |
| ENSG000001  | PPP1R35    | protein pho    | -1.0725 | 0.0016621 | 0.01139  | GO:0032515 |
| ENSG000002  | AL592310.1 | novel pseuc    | 2.3276  | 0.0016642 | 0.011401 |            |
| ENSG000002  | AC005696.4 | novel transc   | -2.9986 | 0.0016842 | 0.011525 |            |
| ENSG000002  | LINC00412  | long interge   | 2.7418  | 0.0016886 | 0.01155  |            |
| ENSG000002  | PKP4-AS1   | PKP4 antisel   | 1.1336  | 0.0016943 | 0.011585 |            |
| ENSG000002  | RF00019    | -              | 2.5234  | 0.0016965 | 0.011595 |            |
| ENSG000001  | FOXP3      | forkhead bc    | 1.3066  | 0.0017067 | 0.011657 | GO:0045944 |
| ENSG000002  | RF00017    | -              | 2.4329  | 0.0017213 | 0.011745 |            |
| ENSG000002  | GUSBP9     | glucuronida    | 1.2113  | 0.0017329 | 0.011814 |            |
| ENSG000002  | BACH1-AS1  | BACH1 antis    | 1.6648  | 0.0017331 | 0.011814 |            |
| ENSG000002  | DPYD-AS1   | DPYD antise    | 1.8691  | 0.0017387 | 0.011847 |            |
| ENSG000002  | AL049835.1 | novel transc   | 1.5378  | 0.001743  | 0.011871 |            |
| ENSG000002  | AC009927.1 | protein tyro   | 1.5564  | 0.0017441 | 0.011875 |            |
| Novel.27454 | -          | -              | 1.6249  | 0.0017444 | 0.011875 |            |
| ENSG000002  | AC023051.1 | novel transc   | 1.8121  | 0.001752  | 0.011923 |            |
| ENSG000002  | AC003989.2 | pseudogene     | 2.8991  | 0.0017553 | 0.011941 |            |
| ENSG000002  | SMYD3-IT1  | SMYD3 intrc    | 1.4434  | 0.0017573 | 0.011952 |            |
| ENSG000002  | XIAP-AS1   | XIAP antiser   | 2.1945  | 0.0017582 | 0.011953 |            |
| ENSG000002  | AC005838.2 | novel transc   | 1.029   | 0.0017615 | 0.011974 |            |
| ENSG000002  | AC093690.1 | uncharacteri   | 1.4264  | 0.0017682 | 0.012011 |            |
| ENSG000002  | HMGB3P14   | high mobil     | 2.9337  | 0.0017709 | 0.012024 |            |
| ENSG000002  | RN7SKP9    | RNA, 7SK sn    | 2.9163  | 0.0017762 | 0.012058 |            |
| ENSG000002  | AC138832.1 | sterol carrier | 2.5139  | 0.00179   | 0.012138 |            |
| ENSG000002  | ZNF425     | zinc finger p  | -1.348  | 0.001801  | 0.01221  | GO:0003676 |
| ENSG000002  | PCDHGA9    | protocadher    | 1.5412  | 0.0018093 | 0.012252 | GO:0003723 |
| ENSG000001  | ABHD12B    | abhydrolase    | 1.5068  | 0.0018275 | 0.012364 | GO:0016787 |
| ENSG000002  | RF00019    | -              | 1.4225  | 0.001844  | 0.012464 |            |
| ENSG000002  | AC091805.1 | ribosomal p    | 4.1279  | 0.0018484 | 0.012477 |            |
| ENSG000002  | GAPDHP51   | glyceraldehy   | 5.2124  | 0.0018493 | 0.012481 |            |
| ENSG000002  | AC022973.2 | novel transc   | 1.4773  | 0.0018538 | 0.012504 |            |
| ENSG000002  | RPL12P29   | ribosomal p    | 3.0957  | 0.0018535 | 0.012504 |            |
| ENSG000002  | TDGF1P6    | teratocarcin   | 2.7578  | 0.001874  | 0.012621 |            |
| ENSG000002  | AC007256.1 | SCY1-like 2    | 2.0466  | 0.0019064 | 0.012811 |            |
| ENSG000001  | CATSPERD   | cation chanr   | 2.455   | 0.0019112 | 0.012833 | GO:0016020 |
| ENSG000002  | INTS9-AS1  | INTS9 antise   | 1.8511  | 0.001912  | 0.012836 |            |
| ENSG000002  | DIAPH2-AS1 | DIAPH2 anti    | 2.2762  | 0.0019128 | 0.012839 |            |
| ENSG000002  | AC091196.1 | novel transc   | 1.6589  | 0.0019171 | 0.01286  |            |
| ENSG000002  | RN7SL426P  | RNA, 7SL, cy   | 1.5812  | 0.0019273 | 0.012915 |            |

|                      |               |         |           |          |            |
|----------------------|---------------|---------|-----------|----------|------------|
| ENSG000002AC025031.4 | novel transc  | 1.6021  | 0.0019337 | 0.012953 |            |
| ENSG000002RF00004    | -             | 1.318   | 0.0019445 | 0.013022 |            |
| ENSG000002AC005692.3 | novel transc  | 1.9591  | 0.00195   | 0.013057 |            |
| ENSG000002AC022306.3 | novel transc  | 5.1363  | 0.001973  | 0.013184 |            |
| ENSG000002MIR5739    | microRNA 5    | 3.2691  | 0.0019953 | 0.013321 |            |
| ENSG000002BNIP3P27   | BCL2 interac  | 1.4822  | 0.0019972 | 0.013331 |            |
| ENSG000002AC099313.1 | novel transc  | 2.2625  | 0.0020077 | 0.013388 |            |
| ENSG000002AL391863.1 | novel transc  | 2.5593  | 0.0020121 | 0.013412 |            |
| ENSG000002AC006116.5 | novel transc  | 2.566   | 0.0020264 | 0.013496 |            |
| ENSG000001Z99496.1   | bromodomæ     | 2.5998  | 0.0020407 | 0.013578 |            |
| ENSG000002AC011939.1 | DnaJ (Hsp4C   | 1.8998  | 0.0020468 | 0.013611 |            |
| ENSG000002C9orf147   | chromosom     | 1.4996  | 0.0020534 | 0.013642 |            |
| ENSG000002RN7SL2     | RNA, 7SL, cy  | 1.067   | 0.0020564 | 0.01366  |            |
| ENSG000002RF00019    | -             | 4.0534  | 0.0020574 | 0.013664 |            |
| ENSG000002PCDHA8     | protocadher   | 2.3935  | 0.0020656 | 0.013711 | GO:0016020 |
| ENSG000002AL031772.1 | novel transc  | 1.5829  | 0.0020669 | 0.013717 |            |
| ENSG000002HMG2P28    | high mobil    | 4.0752  | 0.0020682 | 0.013721 |            |
| ENSG000002AC002044.2 | novel transc  | 1.6459  | 0.0020822 | 0.013798 |            |
| ENSG000002AC015853.1 | novel transc  | 2.9911  | 0.0020901 | 0.013837 |            |
| ENSG000002AGGF1P2    | angiogenic i  | 1.0608  | 0.0020939 | 0.01386  |            |
| ENSG000001FGF13      | fibroblast gr | -1.8737 | 0.0021077 | 0.013939 | GO:0005737 |
| ENSG000002BX640514.2 | novel transc  | -2.9753 | 0.0021216 | 0.014025 |            |
| ENSG000002AC009137.2 | novel transc  | 2.1137  | 0.002124  | 0.014036 |            |
| ENSG000002AC022080.2 | ankyrin repe  | 1.6343  | 0.0021608 | 0.014258 |            |
| ENSG000002TNRC18P1   | trinucleotid  | 2.1458  | 0.0021644 | 0.014279 |            |
| ENSG000002AC004951.1 | novel transc  | 1.2021  | 0.0021873 | 0.014406 |            |
| ENSG000002RNU6-341P  | RNA, U6 sm    | 2.1419  | 0.0021999 | 0.014484 |            |
| ENSG000001RF00019    | -             | 1.6883  | 0.0022386 | 0.01472  |            |
| ENSG000002AC084782.2 | novel transc  | 3.0931  | 0.0022491 | 0.014772 |            |
| ENSG000001RNA5SP319  | RNA, 5S ribc  | 3.2639  | 0.0022513 | 0.014784 |            |
| ENSG000002AC103705.1 | protein tyro  | 1.5077  | 0.0022637 | 0.014859 |            |
| ENSG000002SNRPGP18   | small nuclea  | 1.8723  | 0.0022639 | 0.014859 |            |
| ENSG000002DDX18P5    | DEAD-box h    | 2.2704  | 0.0022743 | 0.014924 |            |
| ENSG000002MIR5699    | microRNA 5    | 2.8133  | 0.0022803 | 0.014955 |            |
| ENSG000002TDGF1P5    | teratocarcin  | 1.6742  | 0.0023058 | 0.015103 |            |
| ENSG000002TTC34      | tetratricopep | 2.1156  | 0.0023131 | 0.015143 |            |
| ENSG000002AC006441.1 | novel transc  | 1.5865  | 0.0023205 | 0.015174 |            |
| ENSG000002AL451047.1 | novel transc  | 2.2016  | 0.0023281 | 0.015208 |            |
| ENSG000002AC137932.2 | uncharacteri  | 1.8181  | 0.0023297 | 0.015215 |            |
| ENSG000001PLN        | phospholan    | 2.7586  | 0.0023317 | 0.015226 | GO:0048471 |
| ENSG000002AC098650.1 | novel transc  | 2.8414  | 0.0023328 | 0.01523  | GO:0008270 |
| ENSG000002RPS3AP12   | ribosomal p   | 2.2909  | 0.0023853 | 0.015536 |            |
| Novel.17006          | -             | 1.2383  | 0.0023868 | 0.015543 |            |
| ENSG000002AL049552.1 | novel transc  | 1.3672  | 0.0023952 | 0.015584 |            |
| ENSG000002RNU6-1282P | RNA, U6 sm    | 4.0165  | 0.0024036 | 0.01563  |            |
| ENSG000001RPSAP19    | ribosomal p   | -1.3142 | 0.0024066 | 0.015644 |            |
| ENSG000002AP000753.3 | ATPase, H+    | 2.4593  | 0.0024066 | 0.015644 |            |
| ENSG000002RF00019    | -             | 2.9644  | 0.0024362 | 0.015804 |            |

|             |            |               |         |           |          |            |
|-------------|------------|---------------|---------|-----------|----------|------------|
| ENSG000001  | ACKR4      | atypical che  | 1.2205  | 0.0024536 | 0.015909 | GO:0016020 |
| ENSG000002  | Z86062.2   | novel transc  | 3.5047  | 0.002457  | 0.015928 |            |
| ENSG000001  | MAMDC2     | MAM domai     | 2.2358  | 0.0024597 | 0.015943 | GO:0016020 |
| ENSG000002  | AC064799.2 | novel transc  | 2.3327  | 0.0024714 | 0.015998 |            |
| ENSG000002  | MCUR1P1    | MCUR1 pse     | 1.5498  | 0.0024714 | 0.015998 |            |
| ENSG000002  | MTOR-AS1   | MTOR antis    | 3.0982  | 0.0024788 | 0.016041 |            |
| ENSG000002  | AL450992.3 | novel transc  | 1.4319  | 0.0024789 | 0.016041 |            |
| ENSG000002  | AC091057.7 | Serine/threc  | 2.1608  | 0.0025047 | 0.01619  |            |
| ENSG000002  | H2AFZP4    | H2A histone   | 1.9277  | 0.0025069 | 0.016202 |            |
| ENSG000001  | HIST2H2AC  | histone dus   | 1.5677  | 0.0025103 | 0.01622  | GO:0005634 |
| ENSG000002  | AC099811.5 | novel transc  | 1.4401  | 0.002523  | 0.01629  |            |
| ENSG000002  | AC009303.2 | novel transc  | 1.5686  | 0.0025433 | 0.016407 |            |
| ENSG000002  | LINC02340  | long interge  | 2.2436  | 0.0025519 | 0.016457 |            |
| ENSG000001  | IL12RB2    | interleukin 1 | 1.2598  | 0.0025595 | 0.0165   | GO:0016020 |
| ENSG000002  | AC074117.2 | ribosomal p   | 5.135   | 0.0025705 | 0.016561 |            |
| ENSG000002  | AC010168.2 | novel transc  | 1.3003  | 0.0025865 | 0.01665  |            |
| ENSG000001  | PCSK1      | proprotein c  | 1.4135  | 0.0025985 | 0.016711 | GO:0005615 |
| ENSG000001  | RNU6-859P  | RNA, U6 sm    | 3.4938  | 0.0026044 | 0.016744 |            |
| ENSG000001  | PHLDA2     | pleckstrin hc | -1.1741 | 0.0026055 | 0.016748 | GO:0005737 |
| ENSG000002  | AC010638.1 | novel transc  | 3.1945  | 0.0026074 | 0.016757 |            |
| ENSG000002  | AC114763.1 | novel transc  | 1.1821  | 0.0026153 | 0.016793 |            |
| ENSG000002  | AC005842.1 | uncharacteri  | 2.0251  | 0.0026442 | 0.016951 |            |
| ENSG000002  | SMIM5      | small integr  | 1.2411  | 0.0026753 | 0.017126 | GO:0016020 |
| ENSG000002  | AL391095.1 | novel transc  | 2.0827  | 0.0026924 | 0.017209 |            |
| Novel.1699E | -          | -             | 2.1086  | 0.0026965 | 0.017231 |            |
| ENSG000002  | RPL12P44   | ribosomal p   | 2.9864  | 0.0026973 | 0.017233 |            |
| ENSG000002  | SLC10A5    | solute carrie | 1.9777  | 0.002722  | 0.017369 | GO:0016020 |
| ENSG000001  | RAB24      | RAB24, mem    | -1.0587 | 0.0027374 | 0.017442 | GO:0005737 |
| ENSG000002  | AC067940.1 | PHD finger p  | 2.5841  | 0.0027511 | 0.017517 |            |
| ENSG000002  | AL445187.1 | vacuolar prc  | 1.7028  | 0.00276   | 0.017565 |            |
| ENSG000002  | MIR1205    | microRNA 1    | 1.346   | 0.0027623 | 0.017576 |            |
| ENSG000002  | UBE2V1P13  | ubiquitin co  | 3.5155  | 0.0027697 | 0.017617 |            |
| ENSG000002  | TXNP6      | thioredoxin   | 1.8323  | 0.0027812 | 0.017681 |            |
| ENSG000002  | AC022336.3 | TEC           | 2.1557  | 0.0027879 | 0.017714 |            |
| ENSG000002  | KLF7-IT1   | KLF7 introni  | 1.4355  | 0.0027955 | 0.017759 |            |
| ENSG000002  | RNU7-79P   | RNA, U7 sm    | 3.0287  | 0.002804  | 0.017803 |            |
| ENSG000002  | RNU6-509P  | RNA, U6 sm    | 5.0871  | 0.0028141 | 0.017857 |            |
| ENSG000002  | RF00019    | -             | 1.8768  | 0.0028167 | 0.017868 |            |
| ENSG000001  | SSTR1      | somatostatil  | -1.8948 | 0.0028189 | 0.017879 | GO:0016020 |
| ENSG000002  | AL359918.2 | novel transc  | 2.4061  | 0.0028459 | 0.018031 |            |
| Novel.1700E | -          | -             | 1.4322  | 0.0028526 | 0.018064 |            |
| ENSG000001  | FAM87B     | family with s | 2.4559  | 0.0028553 | 0.018075 |            |
| ENSG000002  | RNU6-83P   | RNA, U6 sm    | 5.0317  | 0.002859  | 0.018089 |            |
| ENSG000002  | OR4F14P    | olfactory rec | 5.0317  | 0.002859  | 0.018089 |            |
| ENSG000002  | BANF1P1    | barrier to au | 1.2132  | 0.0028633 | 0.018112 |            |
| ENSG000001  | CCDC54     | coiled-coil c | 2.7246  | 0.0028848 | 0.018229 |            |
| ENSG000002  | SEPT7P6    | septin 7 pse  | 1.636   | 0.0028859 | 0.018233 |            |
| ENSG000002  | AC025031.5 | TEC           | 1.8213  | 0.0028909 | 0.018261 |            |

|                      |                 |         |           |          |            |
|----------------------|-----------------|---------|-----------|----------|------------|
| ENSG000002AC055733.1 | cysteine anc    | 2.5317  | 0.0028996 | 0.01831  |            |
| ENSG000002AC011676.3 | novel transc    | 2.061   | 0.0029197 | 0.018414 |            |
| ENSG000002FTLP6      | ferritin light  | 1.918   | 0.0029557 | 0.018595 |            |
| Novel.2745E -        | -               | 3.1464  | 0.0029637 | 0.018639 |            |
| ENSG000001FOXP2      | forkhead bc     | 1.145   | 0.0029716 | 0.018686 | GO:0005634 |
| ENSG000002AC068491.2 | novel transc    | 2.0813  | 0.0029727 | 0.018689 |            |
| ENSG000002RNU6-522P  | RNA, U6 sm      | 4.5417  | 0.0029762 | 0.018708 |            |
| ENSG000002AL807757.1 | novel transc    | 2.3934  | 0.0029992 | 0.018846 |            |
| ENSG000002MIR135A1   | microRNA 1      | 2.9377  | 0.0030087 | 0.018885 | GO:1903231 |
| ENSG000002XKR9       | XK related 9    | 2.0413  | 0.0030155 | 0.018921 | GO:0016020 |
| ENSG000002AC020910.3 | small nuclea    | 3.4835  | 0.0030272 | 0.018986 |            |
| ENSG000001FAM217A    | family with 5   | 1.7405  | 0.0030343 | 0.01902  |            |
| ENSG000002OR2L9P     | olfactory rec   | 3.1571  | 0.0030492 | 0.019103 |            |
| ENSG000002AC008871.1 | novel transc    | 2.4854  | 0.0030699 | 0.019216 |            |
| ENSG000002STX16-NPEF | STX16-NPEF      | 1.4398  | 0.003081  | 0.019275 | GO:0006886 |
| ENSG000002AC023830.1 | novel transc    | 1.4986  | 0.0030984 | 0.019374 |            |
| ENSG000002AP000897.2 | novel transc    | 2.2554  | 0.0031246 | 0.019517 |            |
| ENSG000002HIGD1AP17  | HIG1 hypoxi     | 3.9801  | 0.0031374 | 0.019586 |            |
| ENSG000001CAMK2N1    | calcium/calr    | -1.1749 | 0.003151  | 0.019665 | GO:0016020 |
| ENSG000002FAM185BP   | family with 5   | 1.0253  | 0.0031636 | 0.019713 |            |
| ENSG000002AC010240.2 | eukaryotic tr   | 1.2228  | 0.0031856 | 0.019833 |            |
| ENSG000002AL390774.2 | novel transc    | 2.2812  | 0.0031915 | 0.019852 |            |
| ENSG000001NKPD1      | NTPase KAP      | 1.4816  | 0.0032108 | 0.019955 | GO:0016020 |
| ENSG000002RN7SL735P  | RNA, 7SL, cy    | 3.0124  | 0.0032126 | 0.019962 |            |
| ENSG000002FP671120.4 | novel transc    | 1.5945  | 0.0032738 | 0.020305 |            |
| ENSG000002FAM96AP2   | family with 5   | 2.6429  | 0.003289  | 0.020374 |            |
| ENSG000002G2E3-AS1   | G2E3 antiser    | 1.5272  | 0.0032917 | 0.020383 |            |
| ENSG000002AL162724.1 | novel transc    | 1.566   | 0.0032943 | 0.020389 |            |
| ENSG000002RNU4-87P   | RNA, U4 sm      | 4.534   | 0.0033151 | 0.020496 |            |
| ENSG000001SH3RF2     | SH3 domain      | 1.0988  | 0.0033163 | 0.020501 | GO:0005634 |
| ENSG000001GHRL       | ghrelin and     | 1.1428  | 0.0033241 | 0.020535 | GO:0010469 |
| ENSG000002RPS7P15    | ribosomal p     | 2.7634  | 0.0033304 | 0.02057  |            |
| ENSG000001KLRB1      | killer cell lec | 1.1018  | 0.0033399 | 0.020618 | GO:0016020 |
| ENSG000002AC118555.1 | novel transc    | 1.958   | 0.0033534 | 0.020687 |            |
| ENSG000002MTND5P11   | MT-ND5 pse      | 1.2432  | 0.0033586 | 0.020716 |            |
| ENSG000002AC007114.2 | novel transc    | 1.2668  | 0.0033806 | 0.020841 |            |
| ENSG000001CACNG6     | calcium volt    | -1.5534 | 0.0033847 | 0.020859 | GO:0016020 |
| ENSG000002AL591721.1 | novel transc    | 1.7494  | 0.0033996 | 0.020936 |            |
| ENSG000002RF00019    | -               | 3.4397  | 0.0033991 | 0.020936 |            |
| ENSG000002MIR3144    | microRNA 3      | 2.8074  | 0.0034006 | 0.020938 |            |
| ENSG000002AC011239.2 | TEC             | 2.2498  | 0.0034033 | 0.020951 |            |
| ENSG000002RN7SL370P  | RNA, 7SL, cy    | 3.9205  | 0.0034363 | 0.02114  |            |
| ENSG000001SPTB       | spectrin bet    | 1.3995  | 0.0034416 | 0.021169 | GO:0005737 |
| ENSG000002AC090286.2 | RAN binding     | 1.4609  | 0.0034439 | 0.02118  |            |
| ENSG000001PER3       | period circac   | 1.0366  | 0.0034546 | 0.02122  | GO:0032922 |
| ENSG000002RN7SL733P  | RNA, 7SL, cy    | 4.5175  | 0.0034537 | 0.02122  |            |
| ENSG000002AC006270.1 | novel transc    | 2.6324  | 0.0034668 | 0.021287 |            |
| ENSG000002RF00019    | -               | 2.8004  | 0.0034822 | 0.021375 |            |

|                      |               |         |           |          |            |
|----------------------|---------------|---------|-----------|----------|------------|
| ENSG000002RN7SKP158  | RNA, 7SK sn   | 2.6807  | 0.0034923 | 0.021422 |            |
| Novel.1144E          | -             | 2.6816  | 0.0034924 | 0.021422 |            |
| ENSG000002HSPE1P13   | heat shock p  | 1.912   | 0.0035079 | 0.021514 |            |
| ENSG000002AL356776.1 | nucleoporin   | 2.085   | 0.0035143 | 0.021546 |            |
| ENSG000002AC048380.2 | TEC           | 1.1018  | 0.0035399 | 0.021685 |            |
| ENSG000002AC104982.1 | novel transc  | 1.2878  | 0.003552  | 0.021751 |            |
| ENSG000001C6orf141   | chromosom     | 1.5023  | 0.003554  | 0.021759 |            |
| ENSG000002YPEL5P2    | YPEL5 pseuc   | 1.6167  | 0.0035566 | 0.021768 |            |
| ENSG000002RPSAP36    | ribosomal p   | 2.2337  | 0.0035662 | 0.021816 |            |
| ENSG000002SPTLC1P1   | serine palmi  | 2.2358  | 0.0035674 | 0.021819 |            |
| ENSG000002RNA5SP78   | RNA, 5S ribc  | 1.8482  | 0.0035699 | 0.021831 |            |
| ENSG000002AL354726.1 | novel transc  | 1.602   | 0.0035742 | 0.021849 |            |
| ENSG000002ETF1P1     | eukaryotic ti | 2.5975  | 0.0035759 | 0.021856 |            |
| ENSG000002AC011676.1 | novel transc  | 2.1334  | 0.0035777 | 0.02186  |            |
| ENSG000002AC027544.2 | novel transc  | 1.8766  | 0.0035775 | 0.02186  |            |
| ENSG000002AL589666.2 | TEC           | 2.9656  | 0.0035799 | 0.02187  |            |
| ENSG000002AC007684.1 | novel transc  | 2.4173  | 0.0035931 | 0.021947 |            |
| ENSG000002ARAP1-AS2  | ARAP1 antis   | 1.3787  | 0.003598  | 0.021969 |            |
| ENSG000002AL136379.1 | novel transc  | 2.5996  | 0.003603  | 0.021996 |            |
| ENSG000002RNY1P13    | RNA, Ro-as:   | 1.8548  | 0.0036187 | 0.02208  |            |
| ENSG000002AC131212.2 | novel transc  | 1.6018  | 0.0036267 | 0.022121 |            |
| ENSG000001CHRM5      | cholinergic r | 3.4038  | 0.0036318 | 0.022147 | GO:0016020 |
| ENSG000002AL158801.3 | novel transc  | 1.5973  | 0.0036329 | 0.022148 |            |
| ENSG000001HSPE1P11   | heat shock p  | 2.3638  | 0.0036367 | 0.022163 |            |
| ENSG000001NR4A2      | nuclear rece  | -1.1249 | 0.0036374 | 0.022164 | GO:0005634 |
| ENSG000001DMKN       | dermokine     | -4.2106 | 0.0036491 | 0.022224 | GO:0005515 |
| ENSG000002AL513365.2 | uncharacteri  | 1.9737  | 0.003661  | 0.022293 |            |
| ENSG000002AC022079.2 | novel transc  | 1.601   | 0.0036639 | 0.022303 |            |
| ENSG000002AL365436.2 | novel transc  | 1.8948  | 0.0036662 | 0.022313 |            |
| ENSG000002PCDHA7     | protocadher   | 1.7597  | 0.003668  | 0.02232  | GO:0016020 |
| ENSG000002RPL36AP41  | ribosomal p   | 1.7881  | 0.0036689 | 0.022322 |            |
| ENSG000002RPL37P18   | ribosomal p   | 2.2684  | 0.0036716 | 0.022327 |            |
| ENSG000002BNIP3P16   | BCL2 interac  | 1.2427  | 0.0036717 | 0.022327 |            |
| ENSG000002AL139174.1 | methyImalo    | 3.1374  | 0.0036849 | 0.022393 |            |
| ENSG000002ENPP7P4    | ectonucleoti  | 1.2136  | 0.0037003 | 0.022475 |            |
| ENSG000002FAM53B-AS  | FAM53B ant    | 2.7438  | 0.0036999 | 0.022475 |            |
| ENSG000002AL357054.1 | novel serine  | 1.7043  | 0.0037309 | 0.022634 |            |
| ENSG000002RNU4ATAC1  | RNA, U4atac   | 1.8497  | 0.0037515 | 0.022739 |            |
| ENSG000002MAGI2-AS1  | MAGI2 antis   | 3.1316  | 0.0037778 | 0.022868 |            |
| ENSG000002BNIP3P24   | BCL2 interac  | 1.5613  | 0.0037787 | 0.022869 |            |
| ENSG000002RF00554    | -             | 3.9097  | 0.0037845 | 0.022889 |            |
| ENSG000002AC211433.1 | uncharacteri  | 1.1171  | 0.003784  | 0.022889 |            |
| ENSG000002AC022540.1 | uncharacteri  | 1.239   | 0.003792  | 0.022931 |            |
| Novel.1910E          | -             | 1.2867  | 0.00386   | 0.023318 |            |
| ENSG000002AC092798.1 | ribosomal p   | 1.9567  | 0.0038685 | 0.023354 |            |
| ENSG000002RPL23AP35  | ribosomal p   | 4.985   | 0.0039193 | 0.023624 |            |
| ENSG000002RNU6-198P  | RNA, U6 sm    | 3.4027  | 0.0039395 | 0.023722 |            |
| ENSG000001RAB40A     | RAB40A, me    | 1.0575  | 0.0039622 | 0.023839 | GO:0005622 |

|             |            |               |         |           |          |            |
|-------------|------------|---------------|---------|-----------|----------|------------|
| ENSG000002  | AL121900.1 | uncharacteri  | 1.7474  | 0.0039652 | 0.023846 |            |
| ENSG000002  | RPL10P12   | ribosomal p   | 1.4841  | 0.0039718 | 0.023878 |            |
| ENSG000001  | ADGRG2     | adhesion G    | 1.4811  | 0.003975  | 0.023888 | GO:0016020 |
| ENSG000002  | ARL4AP5    | ADP ribosyl   | 1.7867  | 0.0040157 | 0.024104 |            |
| ENSG000002  | AP002453.1 | adenosine d   | 2.5826  | 0.0040253 | 0.024138 |            |
| ENSG000002  | AL592437.2 | DEP domain    | 1.672   | 0.0040526 | 0.02426  |            |
| ENSG000002  | RSL24D1P8  | ribosomal L   | 1.6821  | 0.0040518 | 0.02426  |            |
| ENSG000002  | AC097716.1 | novel transc  | 4.9185  | 0.0040543 | 0.024267 |            |
| ENSG000002  | ANKRD33B-  | ANKRD33B      | 1.8327  | 0.0040672 | 0.02434  |            |
| ENSG000001  | LGALS2     | galectin 2    | 2.9653  | 0.0040704 | 0.024351 | GO:0030246 |
| ENSG000002  | AL590723.1 | novel transc  | 1.9213  | 0.0040759 | 0.02438  |            |
| ENSG000002  | RPS12P16   | ribosomal p   | 1.4518  | 0.0040997 | 0.024514 |            |
| ENSG000002  | RAB5CP1    | RAB5C, men    | 1.7402  | 0.004111  | 0.024573 |            |
| ENSG000002  | ZMYM4-AS   | ZMYM4 anti    | 2.0344  | 0.004131  | 0.024681 |            |
| ENSG000002  | RN7SL57P   | RNA, 7SL, cy  | 3.8882  | 0.0041408 | 0.024727 |            |
| ENSG000002  | CBX5P1     | chromobox     | 1.7242  | 0.0041446 | 0.024745 |            |
| ENSG000002  | AC067931.1 | TEC           | 1.2857  | 0.0041671 | 0.024871 |            |
| ENSG000002  | CDC42P1    | cell division | 2.9156  | 0.0041712 | 0.024891 |            |
| ENSG000001  | SPDYE16    | speedy/RIN    | 1.6581  | 0.004173  | 0.024898 | GO:0019901 |
| ENSG000002  | AC027682.4 | novel transc  | 2.092   | 0.0041873 | 0.024975 |            |
| ENSG000000  | ( MATK     | megakaryoc    | -2.3915 | 0.0042086 | 0.025077 | GO:0005737 |
| ENSG000002  | AC011944.2 | tec           | 2.0698  | 0.0042107 | 0.025086 |            |
| Novel.17771 | -          | -             | 1.7111  | 0.0042256 | 0.02517  |            |
| ENSG000001  | RNASEK-C1  | RNASEK-C1     | 4.9669  | 0.0042341 | 0.025212 | GO:0016020 |
| ENSG000002  | AC073863.1 | novel transc  | 4.581   | 0.0042602 | 0.025343 |            |
| ENSG000002  | AL390957.1 | novel transc  | 2.9366  | 0.0042749 | 0.025414 |            |
| ENSG000001  | BCL2L14    | BCL2 like 14  | 1.629   | 0.0042992 | 0.025523 | GO:0005737 |
| ENSG000001  | KCTD4      | potassium c   | 2.2567  | 0.0043448 | 0.02577  | GO:0051260 |
| ENSG000002  | RNU6-1003f | RNA, U6 sm    | 1.9375  | 0.0043551 | 0.025826 |            |
| ENSG000002  | AL445523.1 | karyopherin   | 1.9092  | 0.0043633 | 0.025866 |            |
| ENSG000002  | AC091132.5 | novel transc  | 1.5319  | 0.004392  | 0.026019 |            |
| ENSG000001  | NUTM2B     | NUT family    | 1.3054  | 0.0044015 | 0.026071 |            |
| ENSG000002  | AC012464.2 | novel transc  | 2.3278  | 0.0044084 | 0.026103 |            |
| ENSG000002  | AC005520.3 | novel transc  | 1.3995  | 0.0044108 | 0.026113 |            |
| ENSG000002  | AC091769.2 | novel transc  | 1.9738  | 0.0044446 | 0.026274 |            |
| ENSG000002  | YRDCP2     | yrdC N(6)-tl  | 2.2709  | 0.0044603 | 0.026358 |            |
| ENSG000002  | AL080317.2 | novel transc  | 1.1022  | 0.0044647 | 0.026376 |            |
| ENSG000002  | MTND6P5    | MT-ND6 pse    | 3.3403  | 0.0045141 | 0.026634 |            |
| ENSG000002  | AC073530.2 | TEC           | 4.4184  | 0.0045225 | 0.026668 |            |
| ENSG000002  | AL353754.1 | mitochondri   | 2.121   | 0.0045248 | 0.026673 |            |
| ENSG000001  | IRX3       | iroquois hor  | -4.5031 | 0.0045357 | 0.026733 | GO:0005634 |
| ENSG000002  | HNRNPRP1   | heterogene    | 1.3819  | 0.0045428 | 0.026766 |            |
| ENSG000002  | OR2L6P     | olfactory rec | 3.0473  | 0.0045488 | 0.026797 |            |
| ENSG000001  | CASP1      | caspase 1     | -1.5659 | 0.0045658 | 0.026888 | GO:0016787 |
| ENSG000001  | TMPRSS5    | transmembr    | 1.2965  | 0.0045736 | 0.026925 | GO:0016020 |
| ENSG000002  | AC022613.3 | novel transc  | 2.039   | 0.0045772 | 0.026938 |            |
| ENSG000002  | AC022819.1 | novel transc  | 1.8144  | 0.0045901 | 0.026996 |            |
| ENSG000002  | AC133106.1 | novel transc  | 1.9801  | 0.0045995 | 0.027038 |            |

|            |            |                     |         |           |          |            |
|------------|------------|---------------------|---------|-----------|----------|------------|
| ENSG000002 | AC004217.2 | DnaJ (Hsp4C         | 2.7083  | 0.0046191 | 0.02714  |            |
| ENSG000001 | SULF2      | sulfatase 2         | 2.3252  | 0.0046253 | 0.027163 | GO:0040037 |
| ENSG000002 | THSD4-AS1  | THSD4 antis         | 2.105   | 0.0046505 | 0.027293 |            |
| ENSG000002 | RNU4-31P   | RNA, U4 sm          | 3.1243  | 0.0046639 | 0.027354 |            |
| ENSG000002 | AC024267.5 | novel transc        | 1.7816  | 0.004667  | 0.027366 |            |
| ENSG000002 | RPL21P136  | ribosomal p         | 1.9823  | 0.0046715 | 0.027384 |            |
| ENSG000002 | AC090644.1 | -                   | 4.9189  | 0.0047074 | 0.027563 |            |
| ENSG000002 | AP003086.3 | novel transc        | 2.1536  | 0.0047102 | 0.027571 |            |
| ENSG000002 | PCDHA3     | protocadher         | 1.5268  | 0.0047457 | 0.027751 | GO:0016020 |
| ENSG000002 | AC092332.1 | novel transc        | 3.0968  | 0.0047544 | 0.027793 |            |
| ENSG000002 | AC073592.6 | novel transc        | 1.7894  | 0.0047781 | 0.027918 |            |
| ENSG000002 | PKIA-AS1   | PKIA antiser        | 2.0931  | 0.0047816 | 0.027929 |            |
| ENSG000002 | KIZ-AS1    | KIZ antisens        | 1.321   | 0.0048    | 0.028018 |            |
| ENSG000002 | RF01210    | -                   | 3.4015  | 0.0048296 | 0.028178 |            |
| ENSG000002 | RNU6-1305I | RNA, U6 sm          | 2.8972  | 0.0048671 | 0.028387 |            |
| ENSG000002 | RF00598    | -                   | 2.1989  | 0.0048699 | 0.028399 |            |
| ENSG000002 | AL035693.1 | novel transc        | 2.2608  | 0.0048738 | 0.028417 |            |
| ENSG000002 | AL390318.1 | TEC                 | 2.7509  | 0.0048948 | 0.028535 |            |
| ENSG000002 | PDHA1P1    | pyruvate de         | 1.5315  | 0.0049282 | 0.028711 |            |
| ENSG000002 | AC068790.2 | novel transc        | 1.1318  | 0.0049382 | 0.028765 |            |
| ENSG000002 | AL118556.2 | zinc finger p       | 2.3087  | 0.0049425 | 0.028785 |            |
| ENSG000002 | AL138963.1 | novel transc        | 1.4794  | 0.0049567 | 0.028854 |            |
| ENSG000002 | RNU6-1112I | RNA, U6 sm          | 3.4302  | 0.0049631 | 0.028881 |            |
| ENSG000001 | RNF113B    | ring finger p       | 2.3458  | 0.0049674 | 0.028902 | GO:0046872 |
| ENSG000002 | AC245052.2 | leukocyte in        | 4.4529  | 0.0049951 | 0.029039 |            |
| ENSG000002 | MTND2P40   | MT-ND2 pse          | 1.1533  | 0.0050075 | 0.029097 |            |
| ENSG000002 | AC083875.1 | ribosomal p         | 3.5947  | 0.005022  | 0.029172 |            |
| ENSG000002 | AC009754.1 | novel transc        | 3.5081  | 0.0050234 | 0.029175 |            |
| ENSG000002 | AP001011.1 | novel transc        | 3.1322  | 0.0050286 | 0.029198 |            |
| ENSG000002 | AC021106.2 | proteasome          | 2.2453  | 0.0050313 | 0.029202 |            |
| ENSG000001 | CLEC4F     | C-type lectin       | -4.4981 | 0.0050367 | 0.029229 | GO:0016020 |
| ENSG000002 | DNM1P47    | dynamamin 1 p       | 1.377   | 0.0050688 | 0.029386 |            |
| ENSG000002 | NAIP       | NLR family c        | 1.1308  | 0.0050792 | 0.029442 | GO:0005737 |
| ENSG000002 | AC091132.2 | novel transc        | 1.186   | 0.0050828 | 0.029458 |            |
| ENSG000002 | MIR640     | microRNA 6          | 2.0787  | 0.0050959 | 0.029526 |            |
| ENSG000001 | LRRRC9     | leucine rich        | 3.0319  | 0.005121  | 0.029661 |            |
| ENSG000001 | TRIM72     | tripartite mc       | 4.4183  | 0.0051235 | 0.02967  | GO:0016020 |
| ENSG000002 | FCF1P5     | FCF1 pseud          | 2.6522  | 0.0051259 | 0.029675 |            |
| ENSG000002 | RPL23AP17  | ribosomal p         | 1.5963  | 0.0051362 | 0.029725 |            |
| ENSG000002 | AC099336.1 | FK506 bindin        | 4.4791  | 0.0051506 | 0.029803 |            |
| ENSG000002 | AP005899.1 | novel transc        | 1.477   | 0.0051558 | 0.029823 |            |
| ENSG000002 | RF00019    | -                   | 2.1546  | 0.005158  | 0.029832 |            |
| ENSG000001 | KLHL35     | kelch like fa       | 1.5821  | 0.0051652 | 0.029868 | GO:0005515 |
| ENSG000001 | GPR34      | G protein- $\alpha$ | 2.3468  | 0.0051867 | 0.029973 | GO:0016020 |
| ENSG000002 | AL031281.1 | M-phase ph          | 1.1993  | 0.005212  | 0.030115 |            |
| ENSG000002 | RPL19P14   | ribosomal p         | 3.3877  | 0.0052312 | 0.030215 |            |
| ENSG000002 | RNA5SP282  | RNA, 5S rib         | 2.5942  | 0.0052521 | 0.030317 |            |
| ENSG000001 | GNG3       | G protein su        | 1.1772  | 0.0052799 | 0.030463 | GO:0016020 |

|                      |               |         |           |          |            |
|----------------------|---------------|---------|-----------|----------|------------|
| ENSG000002FO393419.2 | novel transc  | 1.8017  | 0.0052832 | 0.030477 |            |
| ENSG000002AC006449.1 | novel transc  | 4.3834  | 0.0052964 | 0.030528 |            |
| ENSG000002OR7E126P   | olfactory rec | 1.5581  | 0.005314  | 0.03061  |            |
| ENSG000002SCARNA3    | small Cajal b | 2.3406  | 0.0053231 | 0.030647 |            |
| ENSG000001UPK1B      | uroplakin 1E  | 2.2442  | 0.0053286 | 0.030675 | GO:0016020 |
| ENSG000002AL157932.1 | novel transc  | 4.3655  | 0.0053333 | 0.030696 |            |
| ENSG000002ATP8A2P2   | ATPase pho    | 4.3747  | 0.0053397 | 0.030728 |            |
| ENSG000002RF00139    | -             | 1.733   | 0.0053485 | 0.03077  |            |
| ENSG000001MIRLET7BHC | MIRLET7B h    | 1.1777  | 0.0053607 | 0.030821 |            |
| ENSG000002ARHGDIG    | Rho GDP dis   | -1.1147 | 0.0053788 | 0.030904 | GO:0005737 |
| ENSG000002AC093422.2 | novel transc  | 3.3209  | 0.0053919 | 0.030972 |            |
| ENSG000002KRT8P33    | keratin 8 pse | 1.0292  | 0.0053932 | 0.030972 |            |
| ENSG000002AC118553.2 | novel protei  | 1.41    | 0.0054356 | 0.03117  | GO:0016020 |
| ENSG000002AL445489.1 | novel transc  | 2.4346  | 0.005437  | 0.03117  |            |
| ENSG000002B3GALNT1P  | beta-1,3-N-   | 1.1764  | 0.0054483 | 0.031219 |            |
| ENSG000002PDCD4-AS1  | PDCD4 antis   | -1.8497 | 0.0055018 | 0.031469 |            |
| ENSG000002AC009242.1 | novel transc  | 1.2657  | 0.0055481 | 0.031719 |            |
| ENSG000002AL353583.1 | TEC           | 2.5145  | 0.0055541 | 0.031728 |            |
| ENSG000002AL162724.2 | novel transc  | 1.6522  | 0.0055784 | 0.031862 |            |
| ENSG000002AC046158.1 | novel transc  | 2.4971  | 0.0056079 | 0.031989 |            |
| ENSG000002AL162431.4 | cell division | 3.8166  | 0.0056321 | 0.032112 |            |
| ENSG000002AC087286.1 | novel transc  | 2.7984  | 0.0056621 | 0.032273 |            |
| ENSG000002AC004134.1 | transmembr    | 3.3405  | 0.0056698 | 0.032296 |            |
| ENSG000001RILP       | Rab interact  | -1.234  | 0.0056743 | 0.032317 | GO:0046983 |
| ENSG000002SERBP1P6   | SERPINE1 m    | 1.4807  | 0.0056753 | 0.032317 |            |
| ENSG000002BNIP3P38   | BCL2 interac  | 1.8811  | 0.0056994 | 0.032449 |            |
| ENSG000002HSP90AB2P  | heat shock p  | 2.3652  | 0.0057075 | 0.032485 |            |
| ENSG000002AC245060.2 | novel transc  | 1.5706  | 0.0057719 | 0.032815 |            |
| ENSG000002AL359762.3 | novel transc  | 1.4684  | 0.0058491 | 0.033212 |            |
| ENSG000002AC100774.1 | novel transc  | 2.3644  | 0.0058529 | 0.033223 |            |
| ENSG000002AC024619.3 | novel transc  | 2.8362  | 0.0058558 | 0.033224 |            |
| ENSG000002RF00019    | -             | 2.1965  | 0.0058899 | 0.03339  |            |
| ENSG000002AL449214.1 | -             | 1.9613  | 0.0059165 | 0.033531 |            |
| ENSG000002AC114763.2 | novel transc  | 1.3889  | 0.0059178 | 0.033532 |            |
| ENSG000002AC036103.1 | novel transc  | 1.9645  | 0.0059474 | 0.033679 |            |
| ENSG000002MTND6P4    | MT-ND6 pse    | 2.2965  | 0.0059521 | 0.03369  |            |
| ENSG000002EIF4E2P1   | eukaryotic ti | 4.822   | 0.005958  | 0.033713 |            |
| ENSG000002AC016542.1 | novel transc  | 1.8109  | 0.005968  | 0.033753 |            |
| ENSG000002RF00019    | -             | 1.3753  | 0.0059671 | 0.033753 |            |
| ENSG000002RPL31P60   | ribosomal p   | 4.8938  | 0.0059763 | 0.033784 |            |
| ENSG000002BMP2KL     | BMP2 induc    | 3.7685  | 0.0060011 | 0.033908 |            |
| ENSG000002RPL9P30    | ribosomal p   | 1.6533  | 0.006026  | 0.034016 |            |
| ENSG000002KLF3P1     | Kruppel like  | 1.901   | 0.0060472 | 0.034131 |            |
| ENSG000002AL133368.1 | ribosomal p   | 1.7833  | 0.006053  | 0.034158 |            |
| ENSG000002AL451062.1 | uncharacteri  | 2.0052  | 0.006083  | 0.034296 |            |
| ENSG000002AC105402.3 | novel transc  | 1.3456  | 0.0061082 | 0.034427 |            |
| ENSG000002AL022323.3 | novel transc  | 1.7096  | 0.0061145 | 0.034457 |            |
| ENSG000002AC055811.1 | novel transc  | 1.4026  | 0.0061162 | 0.034461 |            |



|                      |                     |         |           |          |            |
|----------------------|---------------------|---------|-----------|----------|------------|
| ENSG000002AC006116.2 | NADH dehy           | 2.6066  | 0.006135  | 0.034528 |            |
| ENSG000002RF00601    | -                   | 1.5285  | 0.0061465 | 0.034588 |            |
| ENSG000002AP003086.1 | uncharacteri        | 1.7855  | 0.006158  | 0.034642 |            |
| ENSG000002RNU1-91P   | RNA, U1 sm          | 2.8153  | 0.0061718 | 0.034714 |            |
| ENSG000002KLF4P1     | Kruppel like        | 4.3911  | 0.0061815 | 0.034763 |            |
| ENSG000002MRC1       | mannose re          | 4.8089  | 0.0061825 | 0.034763 | GO:0016020 |
| ENSG000001ACRV1      | acrosomal v         | 1.6042  | 0.0061908 | 0.034804 | GO:0031410 |
| ENSG000002AL121890.4 | novel transc        | 1.7838  | 0.0061957 | 0.034821 |            |
| ENSG000002AC114878.2 | CTAGE famil         | 2.38    | 0.0061979 | 0.034828 |            |
| ENSG000002PCDHA13    | protocadher         | 2.778   | 0.0062022 | 0.034841 | GO:0016020 |
| ENSG000002AL513523.2 | immunoglol          | 2.2246  | 0.0062118 | 0.034886 |            |
| ENSG000002AC007790.1 | ribosomal p         | 1.841   | 0.0062604 | 0.03508  |            |
| ENSG000002AL162386.2 | novel transc        | 1.5618  | 0.0062794 | 0.035174 |            |
| ENSG000002AC027644.1 | pseudogene          | 1.3058  | 0.0062864 | 0.035193 |            |
| ENSG000002ADH5P3     | alcohol dehy        | 1.4641  | 0.0062913 | 0.035215 |            |
| ENSG000002HSPA8P19   | heat shock p        | 1.5307  | 0.0063279 | 0.035368 |            |
| ENSG000001RN7SKP95   | RNA, 7SK sn         | 4.8427  | 0.0063524 | 0.035479 |            |
| ENSG000002RN7SKP271  | RNA, 7SK sn         | 2.0625  | 0.0063918 | 0.035665 |            |
| ENSG000002AL162390.1 | novel transc        | 1.8323  | 0.006407  | 0.035734 |            |
| ENSG000001GPR171     | G protein- $\alpha$ | 2.0804  | 0.0064309 | 0.035856 | GO:0016020 |
| ENSG000002AL391863.2 | novel transc        | 2.7557  | 0.0065556 | 0.036483 |            |
| ENSG000001C1QL1      | complement          | -1.0618 | 0.0065725 | 0.036566 | GO:0005515 |
| ENSG000002RF00019    | -                   | 4.9165  | 0.0065821 | 0.036608 |            |
| ENSG000002NDUFA8P1   | NADH:ubiqu          | 2.9824  | 0.0066022 | 0.036709 |            |
| ENSG000002AL122013.1 | ribosomal p         | 1.8489  | 0.0066024 | 0.036709 |            |
| ENSG000002MTCYBP3    | MT-CYB pse          | 2.3473  | 0.0066068 | 0.036722 |            |
| ENSG000002AC004672.1 | novel transc        | 1.3897  | 0.0066123 | 0.036747 |            |
| ENSG000002RN7SL5P    | RNA, 7SL, cy        | 2.0077  | 0.0066167 | 0.036749 |            |
| ENSG000002AC026894.1 | novel transc        | 1.967   | 0.0066245 | 0.036781 |            |
| ENSG000002AC006116.9 | novel transc        | 1.8842  | 0.0066459 | 0.036888 |            |
| ENSG000001FGL2       | fibrinogen li       | 1.7662  | 0.0066473 | 0.03689  | GO:0005576 |
| ENSG000001SLC3A1     | solute carri        | 2.0964  | 0.0066648 | 0.03697  | GO:0016020 |
| ENSG000002AC073367.1 | novel transc        | 1.3627  | 0.006673  | 0.036993 |            |
| ENSG000001CXCR6      | C-X-C motif         | 1.4381  | 0.0066806 | 0.037028 | GO:0005622 |
| ENSG000002RF00019    | -                   | 1.9898  | 0.0066933 | 0.037082 |            |
| ENSG000002AC010531.4 | uncharacteri        | 2.1527  | 0.0067051 | 0.037136 |            |
| ENSG000002AC120349.3 | TEC                 | 2.4456  | 0.0067192 | 0.037203 |            |
| ENSG000002HIST1H4D   | histone clus        | 1.9525  | 0.0067233 | 0.03722  | GO:0003723 |
| ENSG000002HIST1H4A   | histone clus        | 1.9652  | 0.0067299 | 0.037245 | GO:0003723 |
| ENSG000002AL513412.1 | novel transc        | 2.0898  | 0.0067386 | 0.037287 |            |
| ENSG000002FSBP       | fibrinogen s        | 2.9582  | 0.0067553 | 0.037356 | GO:0005634 |
| ENSG000002AC002310.6 | novel transc        | -1.1933 | 0.00677   | 0.03742  |            |
| Novel.14149          | -                   | 1.1495  | 0.006782  | 0.037475 |            |
| ENSG000002AL139156.1 | transformer         | 2.062   | 0.0067921 | 0.037525 |            |
| ENSG000002ADPGK-AS1  | ADPGK anti:         | 1.3913  | 0.0068062 | 0.03758  |            |
| ENSG000002RPSAP6     | ribosomal p         | 2.357   | 0.0068107 | 0.037599 |            |
| ENSG000002BRWD1-IT1  | BRWD1 intr          | 2.871   | 0.0068239 | 0.037666 |            |
| ENSG000002AL359504.1 | thioredoxin         | 1.8591  | 0.0068324 | 0.037684 |            |

|             |            |               |         |           |          |            |
|-------------|------------|---------------|---------|-----------|----------|------------|
| ENSG000002  | AC116158.1 | novel transc  | 1.5155  | 0.0068318 | 0.037684 |            |
| ENSG000002  | NDUFB4P3   | NADH:ubiqu    | 4.3019  | 0.0068369 | 0.037691 |            |
| ENSG000002  | AC124856.1 | ribosomal p   | 1.2845  | 0.0068713 | 0.037869 |            |
| ENSG000002  | RF02271    | -             | 2.9953  | 0.0069049 | 0.038031 |            |
| ENSG000001  | SMCO3      | single-pass   | 3.7449  | 0.0069074 | 0.038039 | GO:0016020 |
| ENSG000002  | OR52I1     | olfactory rec | 4.3115  | 0.0069152 | 0.038076 | GO:0016020 |
| ENSG000001  | TENT5C     | terminal nuc  | -2.9723 | 0.0069197 | 0.038095 | GO:0003723 |
| ENSG000002  | RF00019    | -             | 1.9968  | 0.0069207 | 0.038095 |            |
| ENSG000002  | AL450263.2 | density-regi  | 4.7691  | 0.0069346 | 0.038148 |            |
| ENSG000002  | RPS24P16   | ribosomal p   | 1.8725  | 0.0069424 | 0.038179 |            |
| ENSG000002  | AC090236.2 | novel transc  | 2.3115  | 0.0069466 | 0.038196 |            |
| ENSG000002  | AL445248.1 | novel transc  | 1.1737  | 0.006948  | 0.038198 |            |
| ENSG000002  | AL109628.1 | ribosomal p   | 3.2758  | 0.0069553 | 0.038226 |            |
| ENSG000002  | RN7SL65P   | RNA, 7SL, cy  | 3.7411  | 0.0069607 | 0.03825  |            |
| ENSG000002  | PCDHGA5    | protocadher   | 2.3379  | 0.0069724 | 0.038303 | GO:0016020 |
| ENSG000002  | BIRC6-AS1  | BIRC6 antise  | 2.0173  | 0.0069812 | 0.038345 |            |
| ENSG000002  | AC145207.9 | TEC           | 1.887   | 0.006997  | 0.03842  |            |
| ENSG000002  | AC011405.1 | novel transc  | 1.1894  | 0.007008  | 0.038469 |            |
| ENSG000002  | RNU6-1297I | RNA, U6 sm    | 4.3808  | 0.007018  | 0.038512 |            |
| ENSG000002  | KIF28P     | kinesin fami  | 1.0858  | 0.0070341 | 0.038588 |            |
| ENSG000002  | AC139792.1 | novel transc  | 2.5042  | 0.0070452 | 0.038643 |            |
| ENSG000002  | PLCE1-AS2  | PLCE1 antis   | 2.9703  | 0.0070507 | 0.038668 |            |
| ENSG000002  | AL357153.2 | novel transc  | 3.3493  | 0.007066  | 0.038734 |            |
| ENSG000002  | AC016542.2 | TEC           | 1.6402  | 0.0070812 | 0.038806 |            |
| ENSG000002  | AL135999.2 | TEC           | 2.2448  | 0.0071316 | 0.039052 |            |
| ENSG000002  | SAMM50P1   | SAMM50 sol    | 2.2196  | 0.0071443 | 0.039073 |            |
| ENSG000001  | FOLR3      | folate recept | -1.7987 | 0.0071462 | 0.039078 | GO:0005542 |
| ENSG000002  | RN7SL623P  | RNA, 7SL, cy  | 4.7961  | 0.0071771 | 0.039223 |            |
| ENSG000002  | RPL7AP11   | ribosomal p   | 1.4252  | 0.0071915 | 0.039295 |            |
| ENSG000002  | AL354696.2 | uncharacteri  | 1.455   | 0.0071967 | 0.039318 |            |
| ENSG000002  | AC023051.2 | Enoyl-CoA l   | 4.7559  | 0.0072205 | 0.039424 |            |
| ENSG000001  | OR4F15     | olfactory rec | 2.6142  | 0.0072333 | 0.03947  | GO:0016020 |
| ENSG000002  | AC092368.3 | novel transc  | -1.4084 | 0.0072691 | 0.039653 |            |
| ENSG000002  | AC007000.2 | pseudogene    | 1.5837  | 0.0072917 | 0.039758 |            |
| ENSG000002  | BTBD9-AS1  | BTBD9 antis   | 1.9508  | 0.0072954 | 0.039772 |            |
| ENSG000002  | AC092910.2 | riboflavin ki | 2.7609  | 0.0073194 | 0.039885 |            |
| ENSG000002  | RN7SL254P  | RNA, 7SL, cy  | 3.3234  | 0.007338  | 0.039968 |            |
| ENSG000001  | HTR5BP     | 5-hydroxytr   | 1.6914  | 0.007349  | 0.040022 |            |
| ENSG000002  | SMARCE1P1  | SWI/SNF rel   | 2.5752  | 0.0073577 | 0.040062 |            |
| ENSG000002  | AL590762.1 | pseudogene    | 1.1834  | 0.0073672 | 0.040097 |            |
| ENSG000002  | CYS1       | cystin 1      | -1.2602 | 0.0073762 | 0.040139 | GO:0005737 |
| Novel.1023E | -          | -             | 2.5023  | 0.0074213 | 0.04036  |            |
| ENSG000001  | TAS2R3     | taste 2 recep | 1.8297  | 0.0074561 | 0.040525 | GO:0016020 |
| ENSG000002  | MRPL50P2   | mitochondri   | 4.3131  | 0.00746   | 0.04054  |            |
| ENSG000001  | DIRAS3     | DIRAS famil   | -1.6747 | 0.0074768 | 0.040599 | GO:0005622 |
| ENSG000002  | SPDYE21P   | speedy/RIN    | 1.0583  | 0.0075063 | 0.040718 |            |
| ENSG000002  | C17orf78   | chromosom     | 1.2236  | 0.0075219 | 0.040787 | GO:0016020 |
| ENSG000002  | AC087683.2 | novel transc  | 2.3216  | 0.0075226 | 0.040787 |            |

|                      |               |         |           |          |            |
|----------------------|---------------|---------|-----------|----------|------------|
| ENSG000002AD000813.1 | TEC           | 1.3273  | 0.0075555 | 0.040953 |            |
| ENSG000002DCTN1-AS1  | DCTN1 antis   | 1.8189  | 0.0075602 | 0.040973 |            |
| ENSG000002PTGES3P2   | prostagland   | 2.3905  | 0.0075946 | 0.041147 |            |
| ENSG000001SDS        | serine dehy   | 1.5262  | 0.0076183 | 0.04125  | GO:0005737 |
| ENSG000002RF00019    | -             | 2.5452  | 0.0076261 | 0.04128  |            |
| ENSG000002LINC00370  | long interge  | 2.9658  | 0.007644  | 0.041351 |            |
| ENSG000002AC008937.2 | novel transc  | 2.6351  | 0.0076594 | 0.041416 |            |
| ENSG000002AC104024.2 | novel transc  | -4.3469 | 0.0076637 | 0.041433 |            |
| ENSG000002HIST1H4F   | histone clus  | 1.5445  | 0.0076656 | 0.041437 | GO:0003723 |
| ENSG000002AC104115.2 | zinc finger p | 1.0842  | 0.0076779 | 0.041479 |            |
| ENSG000001DOK7       | docking pro   | 2.249   | 0.0076826 | 0.041498 | GO:0016020 |
| ENSG000002AC025171.3 | novel transc  | 1.0649  | 0.0076878 | 0.041513 |            |
| ENSG000002HLCS-IT1   | HLCS intron   | 1.8677  | 0.0076912 | 0.041526 |            |
| ENSG000002AC124283.3 | novel transc  | 1.6114  | 0.0076964 | 0.041547 |            |
| ENSG000002AC006539.2 | BCL2/adenc    | 1.302   | 0.0077181 | 0.041639 |            |
| ENSG000002AC017071.1 | novel transc  | 1.7159  | 0.007722  | 0.041654 |            |
| ENSG000002AC025186.1 | ribosomal p   | 1.0437  | 0.0077573 | 0.041813 |            |
| ENSG000002Z98749.1   | novel transc  | 1.7859  | 0.0077639 | 0.041842 |            |
| ENSG000002AC002044.3 | novel transc  | 1.6403  | 0.0077858 | 0.041954 |            |
| ENSG000002NCOA7-AS1  | NCOA7 anti    | 4.2741  | 0.0078064 | 0.042046 |            |
| ENSG000002AC011411.1 | transient rec | 1.4678  | 0.0078338 | 0.042169 |            |
| ENSG000002PPIAP6     | peptidylprol  | 2.6054  | 0.0078447 | 0.042208 |            |
| ENSG000002MAGOH3P    | mago homoc    | 4.2451  | 0.0078582 | 0.042268 |            |
| ENSG000002AC022960.2 | novel transc  | 2.6056  | 0.0078659 | 0.042303 |            |
| ENSG000001LAMC2      | laminin sub   | -1.028  | 0.0078851 | 0.0424   | GO:0008284 |
| ENSG000002AC079035.1 | novel transc  | 1.566   | 0.0078902 | 0.042415 |            |
| ENSG000002PIGFP2     | phosphatidy   | 2.7686  | 0.0079314 | 0.042604 |            |
| ENSG000002AC004893.1 | ring finger p | 1.6532  | 0.0079336 | 0.042609 |            |
| ENSG000002AL451063.1 | tRNA nuclec   | 3.6966  | 0.0079362 | 0.042617 |            |
| ENSG000002AC090543.1 | ribosomal p   | 1.7037  | 0.0079376 | 0.042618 |            |
| ENSG000002RN7SL239P  | RNA, 7SL, c   | 1.6174  | 0.007947  | 0.042656 |            |
| ENSG000002RNU6-780P  | RNA, U6 sm    | 1.475   | 0.0080813 | 0.043312 |            |
| ENSG000001TRIML1     | tripartite mc | 1.5017  | 0.0081209 | 0.043511 | GO:0046872 |
| ENSG000001COL4A3     | collagen typ  | 1.1724  | 0.0081222 | 0.043512 | GO:0043231 |
| ENSG000002RNU6-141P  | RNA, U6 sm    | 1.6976  | 0.0081337 | 0.04356  |            |
| ENSG000002AC103739.2 | novel transc  | 1.6114  | 0.0081328 | 0.04356  |            |
| ENSG000002RN7SL246P  | RNA, 7SL, c   | 1.9955  | 0.0081362 | 0.043567 |            |
| ENSG000002AL080276.2 | novel transc  | 2.9055  | 0.0081668 | 0.043705 |            |
| ENSG000002KRT18P61   | keratin 18 p  | 2.2855  | 0.0081687 | 0.043708 |            |
| ENSG000002AC007365.1 | novel transc  | 2.2459  | 0.0081734 | 0.043727 |            |
| ENSG000002FTH1P1     | ferritin heav | 2.4273  | 0.0081749 | 0.043728 |            |
| ENSG000002AC008953.1 | ribosomal p   | 1.5022  | 0.0081854 | 0.043778 |            |
| ENSG000002AC008813.1 | poly(A) binc  | 4.7833  | 0.0081968 | 0.043832 |            |
| ENSG000002AC004974.1 | novel transc  | 2.4023  | 0.0082041 | 0.043859 |            |
| ENSG000002PCA3       | prostate can  | 1.4584  | 0.0082166 | 0.043906 |            |
| ENSG000001SPIN2A     | spindlin farr | 1.9135  | 0.008238  | 0.044    | GO:0005634 |
| ENSG000002AC012066.1 | nuclear distr | 1.3681  | 0.0082457 | 0.044035 |            |
| ENSG000002SMC2-AS1   | SMC2 antise   | 4.2449  | 0.0082575 | 0.044078 |            |

|            |             |               |         |           |          |            |
|------------|-------------|---------------|---------|-----------|----------|------------|
| ENSG000002 | AP002961.1  | novel transc  | 2.1053  | 0.0082618 | 0.044095 |            |
| ENSG000002 | AP000907.3  | ATP synthas   | 4.7281  | 0.0082665 | 0.044113 |            |
| ENSG000002 | OPA1-AS1    | OPA1 antise   | 1.7367  | 0.0082775 | 0.044152 |            |
| ENSG000002 | ZNF582-AS   | ZNF582 anti   | 1.6506  | 0.0083228 | 0.044367 |            |
| ENSG000002 | EEF1B2P1    | eukaryotic ti | 2.5974  | 0.0083292 | 0.044388 |            |
| ENSG000002 | LINC01521   | long interge  | -1.2838 | 0.0083336 | 0.044405 |            |
| ENSG000002 | AC110792.2  | novel transc  | 2.1792  | 0.008364  | 0.044527 |            |
| ENSG000002 | RPS16P5     | ribosomal p   | 1.3963  | 0.0084037 | 0.044725 |            |
| ENSG000002 | AL050343.2  | novel transc  | 3.0954  | 0.0084183 | 0.04479  |            |
| ENSG000001 | ALPK2       | alpha kinase  | 1.037   | 0.0084294 | 0.044842 | GO:0004674 |
| ENSG000001 | RN7SKP74    | RNA, 7SK sn   | 1.3795  | 0.0084349 | 0.044864 |            |
| ENSG000002 | LINC01794   | long interge  | 2.7213  | 0.008478  | 0.045042 |            |
| ENSG000002 | AC006059.1  | novel transc  | 1.0984  | 0.0084775 | 0.045042 |            |
| ENSG000002 | AC063944.1  | novel transc  | 1.4619  | 0.0084766 | 0.045042 |            |
| ENSG000002 | AC008937.3  | novel transc  | 1.1087  | 0.0084764 | 0.045042 |            |
| ENSG000002 | AL513327.2  | uncharacteri  | 2.7404  | 0.0084954 | 0.045126 |            |
| ENSG000002 | KRT18P7     | keratin 18 p: | 1.5667  | 0.0084989 | 0.045131 |            |
| Novel.5428 | -           | -             | -1.0773 | 0.0085258 | 0.045241 |            |
| ENSG000001 | IDI2        | isopentenyl   | 1.9669  | 0.008556  | 0.045381 | GO:0046872 |
| ENSG000002 | ZNF92P3     | zinc finger p | 1.2609  | 0.0085749 | 0.045445 |            |
| ENSG000001 | IGFN1       | immunoglobl   | -3.8935 | 0.008584  | 0.045475 | GO:0005634 |
| ENSG000002 | RNY4P36     | RNA, Ro-as:   | 2.6097  | 0.0086025 | 0.045547 |            |
| ENSG000002 | AC104763.2  | H3 histone,   | 3.0013  | 0.0086157 | 0.045583 |            |
| ENSG000002 | AC009041.4  | novel transc  | 1.3441  | 0.0086257 | 0.045622 |            |
| ENSG000002 | Z84478.1    | tRNA nuclec   | 2.085   | 0.0086424 | 0.045697 |            |
| ENSG000002 | AL034550.2  | uncharacteri  | 3.6481  | 0.0087121 | 0.046031 |            |
| ENSG000002 | AC002400.1  | cyclin Y-like | 1.647   | 0.0087173 | 0.046045 |            |
| ENSG000002 | CHCHD4P5    | coiled-coil-l | 1.7722  | 0.0087333 | 0.046123 |            |
| ENSG000002 | AP000786.1  | novel transc  | 1.246   | 0.0087356 | 0.046128 |            |
| ENSG000002 | RNA5SP48    | RNA, 5S ribc  | 1.9964  | 0.0087503 | 0.046193 |            |
| ENSG000001 | MMP17       | matrix metal  | -1.1786 | 0.0087701 | 0.04627  | GO:0016020 |
| ENSG000002 | PABPC1P1    | poly(A) binc  | 1.231   | 0.008796  | 0.046379 |            |
| ENSG000001 | MPP4        | membrane p    | -1.1253 | 0.0088078 | 0.046434 | GO:0005737 |
| ENSG000002 | AL162431.3  | pseudogene    | 1.3986  | 0.0088132 | 0.046456 |            |
| ENSG000002 | C21orf62-AS | C21orf62 an   | 2.2193  | 0.0088316 | 0.046533 |            |
| ENSG000002 | RN7SL459P   | RNA, 7SL, cy  | 2.6213  | 0.0088567 | 0.04663  |            |
| ENSG000002 | AC009303.1  | nuclear factr | 2.9361  | 0.008859  | 0.046636 |            |
| ENSG000002 | HNRNPA1P1   | heterogene    | 3.6254  | 0.0088811 | 0.046725 |            |
| ENSG000002 | LINC01845   | long interge  | 4.7281  | 0.0089184 | 0.046886 |            |
| ENSG000001 | FNDC11      | fibronectin t | 2.552   | 0.008945  | 0.047013 | GO:0005515 |
| Novel.6200 | -           | -             | -1.473  | 0.008963  | 0.047079 |            |
| ENSG000002 | AC005856.1  | novel transc  | 2.674   | 0.0089805 | 0.047158 |            |
| ENSG000002 | TPM1-AS     | TPM1 antise   | 1.672   | 0.0090415 | 0.047457 |            |
| ENSG000002 | AL031663.3  | novel transc  | 4.7141  | 0.0090811 | 0.047644 |            |
| ENSG000002 | C1orf220    | chromosom     | 1.2053  | 0.0091057 | 0.047752 |            |
| ENSG000002 | ARL4AP4     | ADP ribosyl   | 1.52    | 0.0091092 | 0.047756 |            |
| ENSG000002 | RN7SL530P   | RNA, 7SL, cy  | 1.6576  | 0.0091128 | 0.047768 |            |
| ENSG000002 | DPYD-AS2    | DPYD antise   | 1.4987  | 0.0091241 | 0.047821 |            |

|            |            |               |         |           |          |            |
|------------|------------|---------------|---------|-----------|----------|------------|
| ENSG000002 | MIR3173    | microRNA 3    | 4.1958  | 0.0091813 | 0.048106 | GO:0005615 |
| ENSG000002 | ZNF101P2   | zinc finger p | 2.7581  | 0.0091922 | 0.048133 |            |
| ENSG000002 | RCC2P4     | regulator of  | 1.7141  | 0.0091923 | 0.048133 |            |
| ENSG000002 | RNU6-1214  | RNA, U6 sm    | 2.3965  | 0.0091944 | 0.048133 |            |
| ENSG000002 | MT-TE      | mitochondri   | 1.6113  | 0.0092358 | 0.048328 |            |
| ENSG000002 | AC019070.1 | Ubiquitin ca  | 2.5358  | 0.0092845 | 0.048526 |            |
| ENSG000002 | MAGI1-AS1  | MAGI1 antis   | 2.1861  | 0.0092871 | 0.048533 |            |
| ENSG000002 | EEF1A1P3   | eukaryotic tr | 1.2977  | 0.0093468 | 0.048816 |            |
| ENSG000002 | AL591719.1 | chromosom     | 2.3866  | 0.0093779 | 0.048964 |            |
| ENSG000002 | AC130324.1 | novel transc  | 1.37    | 0.0094165 | 0.049108 |            |
| ENSG000001 | DENND2D    | DENN doma     | 2.8083  | 0.0094564 | 0.049295 | GO:0005737 |
| ENSG000002 | CCNB1IP1P1 | cyclin B1 int | 2.6121  | 0.0094994 | 0.049478 |            |
| ENSG000002 | RPAP2P1    | RNA polym     | 2.0056  | 0.0094962 | 0.049478 |            |
| ENSG000002 | PPIAP51    | peptidylprol  | 1.2227  | 0.0095011 | 0.049478 |            |
| ENSG000002 | AL356805.1 | novel transc  | 3.2285  | 0.0095249 | 0.04958  |            |
| ENSG000002 | MIR3679    | microRNA 3    | 2.9373  | 0.0095492 | 0.04969  |            |
| ENSG000002 | AP001469.1 | novel transc  | 1.4776  | 0.0095569 | 0.049718 |            |
| ENSG000001 | MYRIP      | myosin VIIA   | 2.5322  | 0.0095668 | 0.049762 | GO:0005737 |
| ENSG000002 | AC027130.1 | uncharacteri  | 2.2141  | 0.0095835 | 0.049842 |            |
| ENSG000002 | RPS3AP47   | ribosomal p   | -1.4644 | 0.009608  | 0.049955 |            |

| GO annotation                                                                           | KO ID     | pathway ID | pathway name                                | TF family | siPDIA-1 count | siPDIA-nc count |
|-----------------------------------------------------------------------------------------|-----------|------------|---------------------------------------------|-----------|----------------|-----------------|
| RNA binding                                                                             | hsa:2923  | hsa04141   | hs Protein processing in nucleus            |           | 572.93         | 3264.89         |
| cytoplasm;cytoplasm;positive regulation of cytoplasmic                                  | hsa:3939  | hsa00010   | hs Glycolysis / Gluconeogenesis             |           | 11273.35       | 23163.17        |
| cytoplasm;cytoplasm;positive regulation of cytoplasmic                                  | hsa:595   | hsa01522   | hs Endocrine resistance                     |           | 817.46         | 3200.14         |
| cytoplasm;cytoplasm;positive regulation of cytoplasmic                                  | hsa:3925  | hsa04010   | hs MAPK signaling pathway                   |           | 1572.6         | 4316.43         |
|                                                                                         |           |            |                                             |           | 17809.28       | 8305.02         |
| positive regulation of nucleus                                                          | hsa:3688  | hsa04015   | hs Rap1 signaling pathway                   |           | 5666.27        | 11810.33        |
| nucleus;nucleus;cytoplasm;cytosol;perinuclear region of cytoplasmic                     | hsa:3675  | hsa04151   | hs PI3K-Akt signaling pathway               |           | 1646.78        | 3581.96         |
| membrane;integral component of membrane                                                 | hsa:3675  | hsa04151   | hs PI3K-Akt signaling pathway               |           | 2496.67        | 5822.59         |
| nucleus;cytoplasm;nucleus;cytosol;fibrillar center;cytoskeleton                         | hsa:5621  | hsa04216   | hs Ferroptosis                              |           | 1349.73        | 2955            |
| negative regulation of nucleus                                                          | hsa:7416  | hsa04020   | hs Calcium signaling pathway                |           | 1071.1         | 2408.64         |
| nucleus;membrane;integral component of membrane                                         | hsa:960   | hsa04512   | hs ECM-receptor interaction                 |           | 1711.14        | 3440.64         |
| positive regulation of membrane;integral component of membrane                          | hsa:6382  | hsa04512   | hs ECM-receptor interaction                 |           | 2342.46        | 4992.7          |
| cell migration                                                                          | hsa:5420  | hsa05132   | Salmonella infection                        |           | 599.7          | 1521.23         |
| nucleus;nucleus;Golgi apparatus;Golgi apparatus;protein binding;extracellular           | hsa:1017  | hsa04068   | hs FoxO signaling pathway                   |           | 1807.54        | 3758.23         |
| positive regulation of transcription by RNA polymerase II                               | hsa:5420  | hsa05132   | Salmonella infection                        |           | 1001.58        | 2193.99         |
| nucleus;nucleolus;nucleus;cytoplasm;nucleus;nucleolus;perinuclear region of cytoplasmic | hsa:1017  | hsa04068   | hs FoxO signaling pathway                   |           | 1851.55        | 3892.76         |
| positive regulation of transcription by RNA polymerase II                               | hsa:1017  | hsa04068   | hs FoxO signaling pathway                   |           | 3451.9         | 7355.08         |
| nucleus;nucleolus;nucleus;cytoplasm;nucleus;nucleolus;perinuclear region of cytoplasmic | hsa:1017  | hsa04068   | hs FoxO signaling pathway                   |           | 695.48         | 1714.39         |
| nucleus;nucleus;cytoplasm;cytoplasm;cytoplasm;membrane                                  | hsa:81537 | hsa00600   | hs Sphingolipid metabolism                  |           | 766.79         | 222.16          |
| membrane;integral component of membrane                                                 | hsa:81537 | hsa00600   | hs Sphingolipid metabolism                  |           | 392.67         | 1059.06         |
| extracellular                                                                           | hsa:1292  | hsa04151   | hs PI3K-Akt signaling pathway               |           | 885.52         | 1936.22         |
| extracellular                                                                           | hsa:5054  | hsa04066   | hs HIF-1 signaling pathway                  |           | 2375.13        | 5076.31         |
| gap junction                                                                            | hsa:2697  | hsa04540   | hs Gap junction                             |           | 641.59         | 1659.81         |
| nucleus;nucleus                                                                         | hsa:6472  | hsa00260   | hs Glycine, serine and threonine metabolism |           | 316.88         | 937.95          |
|                                                                                         |           |            |                                             |           | 1901.58        | 4031.05         |
|                                                                                         |           |            |                                             |           | 2205.6         | 955.43          |
| nucleus;cytoplasm;cytoplasm;membrane;integral component of membrane                     | hsa:4267  | hsa04514   | hs Cell adhesion molecules                  |           | 6014.4         | 2845.61         |
| membrane;integral component of membrane                                                 | hsa:4267  | hsa04514   | hs Cell adhesion molecules                  |           | 816.54         | 1688.9          |
| positive regulation of nucleus                                                          | hsa:3572  | hsa04060   | hs Cytokine-cytokine receptor interaction   |           | 1493.92        | 3096.81         |
| nucleus;nucleus                                                                         | hsa:8061  | hsa04310   | hs Wnt signaling pathway                    |           | 654.51         | 1789.07         |
| cytoplasm;nucleus                                                                       | hsa:2182  | hsa00061   | hs Fatty acid biosynthesis                  |           | 976.25         | 1983            |
| nucleus;DNA binding;protein heterodimerization activity;protein                         | hsa:7273  | hsa05410   | hs Hypertrophic cardiomyopathy              |           | 867.84         | 1757.04         |
| cardiac muscle                                                                          | hsa:7273  | hsa05410   | hs Hypertrophic cardiomyopathy              |           | 869.76         | 326.47          |
| nucleus;cell                                                                            | hsa:900   | hsa04115   | hs p53 signaling pathway                    |           | 1059.36        | 2133.02         |
| positive regulation of membrane;integral component of membrane                          | hsa:4067  | hsa04062   | hs Chemokine signaling pathway              |           | 340.99         | 869.08          |
|                                                                                         |           |            |                                             |           | 901.05         | 332.26          |
|                                                                                         |           |            |                                             |           | 1328.12        | 546.32          |
| apoptotic process;autophagy;death domain binding;negative regulation of                 |           |            |                                             |           | 611.11         | 1296.28         |
| membrane;integral component of membrane;endoplasmic reticulum                           |           |            |                                             |           | 318.26         | 814.4           |
| membrane;integral component of membrane;plasma membrane                                 |           |            |                                             |           | 649.86         | 1335.34         |
| RNA binding                                                                             | hsa:1728  | hsa00130   | hs Ubiquinone and ubiquinol biosynthesis    |           | 958.12         | 2164.14         |
| cytosol;nucleus                                                                         | hsa:4907  | hsa00230   | hs Purine metabolism                        |           | 544.92         | 1240.82         |
| cytoplasm;cytoplasm                                                                     | hsa:6164  | hsa03010   | Ribosome                                    |           | 715.32         | 1537.33         |
|                                                                                         |           |            |                                             |           | 475.68         | 130.81          |
| membrane;cytoplasm                                                                      | hsa:1291  | hsa04151   | hs PI3K-Akt signaling pathway               |           | 2413.04        | 4885.39         |
| extracellular                                                                           | hsa:6422  | hsa04310   | hs Wnt signaling pathway                    |           | 281.17         | 734             |

|                                                               |                                    |        |         |
|---------------------------------------------------------------|------------------------------------|--------|---------|
| RNA binding;nucleus;nucleus;nucleolus;mitochondrion;nu        |                                    | 544.6  | 1177.29 |
| nucleus;cytc hsa:3839                                         | hsa05132 Salmonella infection      | 719.43 | 1448.4  |
| mitochondrion;mitochondrion;apoptotic process;mitochor        |                                    | 44.6   | 286.07  |
|                                                               |                                    | 358.1  | 84.41   |
| isomerase activity;peptidyl-prolyl cis-trans isomerase activ  |                                    | 593.08 | 1246.48 |
| nucleus;cytoplasm;membrane;membrane;cytosol;nucleopl          |                                    | 301.26 | 718.65  |
| metal ion bi hsa:7052                                         | hsa05016 Huntington disease        | 105.74 | 430.21  |
| membrane;integral component of membrane;cell adhesion         |                                    | 588.93 | 1256.44 |
| negative regulation of endothelial cell proliferatic RXR-like |                                    | 464.03 | 981.22  |
| nucleus;cytc hsa:10318                                        | hsa05131 Shigellosis               | 329.41 | 739.49  |
| nucleus;metal ion binding;transferase activity;protein ubiq   |                                    | 358.79 | 838.23  |
| negative reg hsa:7078                                         | hsa05205;hs Proteoglycans in can   | 306.01 | 721.76  |
| extracellular hsa:7473                                        | hsa04150;hs mTOR signaling path    | 336.86 | 749.95  |
|                                                               |                                    | 444.17 | 142.63  |
|                                                               |                                    | 242.67 | 722.64  |
| cell adhesio hsa:3914                                         | hsa04151;hs PI3K-Akt signaling p   | 224.63 | 624     |
|                                                               |                                    | 273.82 | 72.78   |
| membrane;l hsa:123                                            | hsa03320 PPAR signaling path       | 488.72 | 1209.74 |
| cytoplasm;n hsa:65108                                         | hsa04666;hs Fc gamma R-mediate     | 326.83 | 767.37  |
| membrane;i hsa:64065                                          | hsa04115 p53 signaling pathwa      | 267.69 | 621.49  |
| cytosol;regu hsa:2730                                         | hsa00270;hs Cysteine and methior   | 338.07 | 798.09  |
| membrane;i hsa:5329                                           | hsa04610;hs Complement and coa     | 279.78 | 675.28  |
| positive reg hsa:1490                                         | hsa04371;hs Apelin signaling pat   | 573.67 | 1331.38 |
| extracellular space;protein binding;extracellular region;extr |                                    | 124.93 | 413.6   |
| cytoplasm;n hsa:8877                                          | hsa00600;hs Sphingolipid metabo    | 169.77 | 521.31  |
| nucleus;cytc hsa:27018                                        | hsa04722 Neurotrophin signali      | 394.07 | 837.47  |
| protein kinase activity;ATP binding;protein phosphorylatic    |                                    | 375.55 | 812.35  |
| membrane;integral component of membrane                       |                                    | 433.64 | 869.76  |
|                                                               |                                    | 303.92 | 81.82   |
| nucleic acid hsa:91120                                        | hsa05168 Herpes simp zf-C2H2       | 521.73 | 210.72  |
| negative reg hsa:51129                                        | hsa03320;hs PPAR signaling path    | 176.31 | 576.11  |
| membrane;r hsa:1535                                           | hsa04145;hs Phagosome ;Osteocla    | 211.71 | 583.63  |
|                                                               |                                    | 239.61 | 591.83  |
| negative reg hsa:55869                                        | hsa05034;hs Alcoholism ;Viral carc | 698.54 | 343.74  |
| cytoplasm;t hsa:6235                                          | hsa03010 Ribosome                  | 534.23 | 1173.17 |
| intracellular hsa:2250                                        | hsa04010;hs MAPK signaling path    | 226.45 | 549.06  |
|                                                               |                                    | 563.07 | 258.52  |
| membrane;metal ion binding;calcium ion binding;membra         |                                    | 429.48 | 911.9   |
| RNA binding hsa:6624                                          | hsa05206 MicroRNAs in cancer       | 418.18 | 882.39  |
| metal ion binding;methylated histone binding;negative reg     |                                    | 351.38 | 728.38  |
|                                                               |                                    | 407.98 | 139.31  |
|                                                               |                                    | 405.65 | 123.53  |
| cytoplasm;si hsa:4660                                         | hsa04270;hs Vascular smooth mus    | 641.96 | 314.82  |
| RNA binding;nucleus;nucleus;nucleolus;DNA binding;nucl        |                                    | 361.45 | 808.94  |
|                                                               |                                    | 331.17 | 107.15  |
| nucleic acid binding;RNA binding;RNA binding;mRNA pro         |                                    | 210.31 | 482.59  |
| membrane;i hsa:3673                                           | hsa04145;hs Phagosome ;PI3K-Ak     | 341.79 | 692.64  |
| membrane;hydrolase activity;plasma membrane;phosphop          |                                    | 155.75 | 398     |

|                                                                |        |        |
|----------------------------------------------------------------|--------|--------|
| cytoplasm;cytoplasm;membrane;cytosol;plasma membrane           | 222.06 | 486.53 |
| growth factor;hsa:3589 hsa04060;hs Cytokine-cytokine re        | 354.46 | 820.7  |
| nucleus;cytoplasm;cell redox homeostasis;oxidation-reduct      | 282.27 | 583.41 |
| extracellular space;nucleus;cytoplasm;zinc ion binding;DNA     | 354.32 | 781.5  |
|                                                                | 284.48 | 83.72  |
| membrane;r hsa:11031 hsa04144 Endocytosis                      | 219.75 | 509.47 |
| transcription, DNA-templated;negative regulation of phos       | 74.87  | 239.25 |
| membrane;integral component of membrane;proteolysis;n          | 186.34 | 52.37  |
|                                                                | 131.11 | 24.53  |
| RNA binding;nucleus;DNA binding;chromatin DNA bindin           | 150.62 | 24.49  |
| nucleus;cytoplasm;cytosol;nucleoplasm;cytosol;protein bin      | 278.25 | 569.95 |
| negative regulation of canonical Wnt signaling pathway;ex      | 248.03 | 513.47 |
| methyltrans hsa:2593 hsa00260;hs Glycine, serine and th        | 86.72  | 265.84 |
| membrane;integral component of membrane;transporter a          | 308.32 | 645.99 |
|                                                                | 149.36 | 34.7   |
| cytoplasm;membrane;protein transport;nucleotide binding        | 135.36 | 326.29 |
| membrane;i hsa:1949 hsa04360 Axon guidance                     | 138.62 | 344.89 |
|                                                                | 55.82  | 192.63 |
|                                                                | 221.14 | 70.17  |
| nucleotide binding;GTPase activity;GTP binding;intracellul     | 192.82 | 60.51  |
| RNA binding;translation;ribosome;mitochondrion;mitochc         | 185.51 | 413.43 |
|                                                                | 295.27 | 112.27 |
| metal ion bi hsa:27445 hsa04911 Insulin secretion              | 192.19 | 59.25  |
|                                                                | 392.76 | 192.32 |
|                                                                | 87.42  | 13.23  |
| nucleic acid binding;RNA binding;zinc ion binding;metal ic     | 144.18 | 337.42 |
| cell adhesion;extracellular region;collagen-containing extr    | 84.82  | 11.04  |
| cytoplasm;n hsa:5737 hsa04020;hs Calcium signaling pat         | 137.71 | 326.27 |
| cytoplasm;c hsa:127281 hsa00590;hs Arachidonic acid met        | 100.25 | 262.72 |
|                                                                | 399.48 | 196.49 |
|                                                                | 162.67 | 41.71  |
|                                                                | 243.01 | 98.52  |
|                                                                | 272.95 | 107.89 |
| cytoplasm;h hsa:1849 hsa04010 MAPK signaling path              | 215.53 | 453.15 |
| membrane;i hsa:290 hsa00480;hs Glutathione metaboli            | 171.17 | 391.64 |
| nucleic acid binding;regulation of transcription, D zf-C2H2    | 244.58 | 100.19 |
| nucleus;cytoplasm;metal ion binding;calcium ion binding;r      | 151.29 | 43.57  |
|                                                                | 294.84 | 118.3  |
|                                                                | 303.38 | 137.7  |
| extracellular space;growth factor activity;regulation of signi | 144.65 | 41.06  |
|                                                                | 304.98 | 139.32 |
| membrane;plasma membrane;nervous system developmer             | 29.14  | 130.49 |
| membrane;i hsa:8829 hsa04360;hs Axon guidance ;Hum             | 126.6  | 293.01 |
| hydrolase activity;DNA binding;chromosome;meiotic cell c       | 223.89 | 86.46  |
|                                                                | 113.98 | 26.92  |
| nucleotide binding;protein kinase activity;protein serine/th   | 99.54  | 244.59 |
| intracellular hsa:200916 hsa03010 Ribosome                     | 139.26 | 309.18 |
| calcium ion binding;extracellular region;collagen binding;c    | 100.51 | 21.36  |



|                                                                |        |        |
|----------------------------------------------------------------|--------|--------|
| membrane;integral component of membrane;plasma mem             | 123.64 | 28.97  |
|                                                                | 103.09 | 20.8   |
| RNA binding;nucleus;nucleus;DNA binding;chromatin DN/          | 339.73 | 136.99 |
| cytoplasm;c hsa:8835 hsa04630;hs JAK-STAT signaling p          | 81.45  | 217.64 |
| nucleic acid hsa:158431 hsa05168 Herpes simp zf-C2H2           | 255.06 | 109.6  |
| nucleus;cytc hsa:4502 hsa04978 Mineral absorption              | 169.23 | 365.69 |
| calcium ion binding;cell adhesion;extracellular region;extra   | 142.29 | 311.4  |
| negative regulation of apoptotic process;membrane;integr       | 183.49 | 401.91 |
| nucleus;nuc hsa:440689 hsa05034;hs Alcoholism ;Viral carc      | 133.55 | 28.1   |
|                                                                | 470.42 | 219    |
|                                                                | 143.03 | 28.93  |
| membrane;integral component of membrane;intracellular r        | 144.46 | 324.88 |
| membrane;i hsa:3679 hsa04151;hs PI3K-Akt signaling p           | 261.97 | 555.05 |
| extracellular hsa:1839 hsa01522;hs Endocrine resistance        | 114.45 | 270.75 |
|                                                                | 93.84  | 242.74 |
| cytoplasm;membrane;plasma membrane;plasma membran              | 106.49 | 295.1  |
| membrane;integral component of membrane;membrane;ir            | 204.89 | 78.55  |
| membrane;metal ion binding;calcium ion binding;protein b       | 205.6  | 416.31 |
| nucleus;nucleus;metal ion binding;nucleoplasm;transcripti      | 176.18 | 355.98 |
| nucleic acid binding;nucleus;nucleus;cytoplasm;r ZBTB          | 454.78 | 223.63 |
| nucleus;nucleus;cytoplasm;hydrolase activity;protein homc      | 153.87 | 322.12 |
| cytoplasm;n hsa:3357 hsa04020;hs Calcium signaling pat         | 66.15  | 8.71   |
| membrane;integral component of membrane;intrinsic com          | 46.36  | 152.1  |
|                                                                | 338.62 | 167.06 |
| membrane;integral component of membrane;transmembr             | 164.13 | 59.17  |
| membrane;integral component of membrane;integral com           | 150.31 | 318.29 |
| extracellular region;heparin binding;extracellular matrix;cell | 168.23 | 60.54  |
| nucleus;cytoplasm;cytosol;nucleoplasm;protein binding          | 167.32 | 341.44 |
|                                                                | 108.47 | 24.84  |
|                                                                | 116.7  | 31.72  |
| transcriptior hsa:57761 hsa04931 Insulin resistance            | 251.34 | 528.58 |
| intracellular;membrane;integral component of membrane;(        | 116.73 | 264.48 |
|                                                                | 294.08 | 135.35 |
| membrane;r hsa:1160 hsa00330;hs Arginine and proline           | 130.3  | 38.57  |
| membrane;integral component of membrane;plasma mem             | 82.73  | 16     |
| membrane;integral component of membrane;cytoskeleton           | 241.4  | 108.6  |
| membrane;i hsa:2043 hsa04360 Axon guidance                     | 315.86 | 149.64 |
| metal ion binding;hydrolase activity;lyase activity;peptidas   | 183.4  | 68.78  |
|                                                                | 100.47 | 26.38  |
|                                                                | 213.07 | 83.91  |
|                                                                | 114.08 | 31.79  |
| cytosol;nucleoplasm;protein dimerization activity;bHLH         | 219.24 | 438.78 |
| cytoplasm;cytoplasm                                            | 282.61 | 130.43 |
| nucleus;nuc hsa:8349 hsa05034;hs Alcoholism ;Viral carc        | 198.25 | 74.08  |
|                                                                | 117.47 | 28.72  |
|                                                                | 215.44 | 82.59  |
|                                                                | 78.05  | 15.39  |
|                                                                | 67.12  | 10.74  |

|                                                            |                                    |           |          |
|------------------------------------------------------------|------------------------------------|-----------|----------|
| membrane;i hsa:93183                                       | hsa00563;hs Glycosylphosphatidy    | 122.14    | 264.83   |
|                                                            |                                    | 172.46    | 59.94    |
|                                                            |                                    | 95.59     | 23.38    |
|                                                            |                                    | 80.41     | 17.52    |
| cytoplasm;c hsa:3945                                       | hsa00010;hs Glycolysis / Gluconec  | 145.63    | 305.83   |
| membrane;integral component of membrane;peptide bind       |                                    | 13.12     | 83.69    |
|                                                            |                                    | 269.51    | 115.67   |
| cytoplasm;n hsa:11343                                      | hsa00561;hs Glycerolipid metaboli  | 68.04     | 180.83   |
|                                                            |                                    | 85.86     | 20.7     |
| positive regulation of transcription by RNA polym Fork_heæ |                                    | 112.5     | 255.96   |
| protein binding;protein binding;protein binding            |                                    | 364.63    | 168.57   |
| nucleic acid binding;nucleus;metal ion binding;Df zf-C2H2  |                                    | 256.95    | 116.67   |
| growth factc hsa:6387                                      | hsa04060;hs Cytokine-cytokine re   | 157.79    | 344.43   |
| endoplasmic hsa:7869                                       | hsa04360 Axon guidance             | 133.59    | 278.98   |
| nucleus;cytoplasm;metal ion binding;protein binding;nucle  |                                    | 82.31     | 214.14   |
|                                                            |                                    | 116.42    | 34.47    |
|                                                            |                                    | 222.95    | 92.8     |
| nucleus;hyd hsa:1847                                       | hsa04010 MAPK signaling path       | 63.97     | 166.34   |
| RNA binding;nucleus;nucleus;DNA binding;chromatin DN/      |                                    | 326.87    | 56.89    |
|                                                            |                                    | 77.28     | 17.28    |
|                                                            |                                    | 95.7      | 26.23    |
| membrane;integral component of membrane;cell adhesion      |                                    | 141.37    | 52.2     |
|                                                            |                                    | 122100.82 | 25993.06 |
| nucleus;cytoplasm;zinc ion binding;metal ion binding;cyto  |                                    | 139.77    | 280.11   |
| membrane;integral component of membrane;actin binding      |                                    | 80.57     | 19.56    |
|                                                            |                                    | 79.62     | 14.9     |
| RNA binding; hsa:8367                                      | hsa05034;hs Alcoholism ;Viral carc | 144.91    | 35.32    |
|                                                            |                                    | 147.78    | 55.54    |
|                                                            |                                    | 227.84    | 109.81   |
| cytoplasm;cytoplasm;membrane;protein binding;protein b     |                                    | 40.57     | 123.13   |
|                                                            |                                    | 194.18    | 88.14    |
|                                                            |                                    | 83.31     | 21.55    |
| nucleotide binding;ATP binding;nucleotide binding;ATP bi   |                                    | 225.04    | 109.97   |
|                                                            |                                    | 135.26    | 50.07    |
|                                                            |                                    | 252455.63 | 80973.19 |
| membrane;cell adhesion;plasma membrane;plasma membr        |                                    | 142.17    | 53.99    |
|                                                            |                                    | 143.05    | 54.49    |
| nucleus;nuc hsa:4616                                       | hsa04010;hs MAPK signaling path    | 126.89    | 271.54   |
| nucleus;nuc hsa:3017                                       | hsa05034;hs Alcoholism ;Viral carc | 281.46    | 130.71   |
| extracellular hsa:5360                                     | hsa03320;hs PPAR signaling path    | 121.77    | 244.69   |
| protein binding;cytoplasmic microtubule;cytoplasmic micrc  |                                    | 140.92    | 290.1    |
|                                                            |                                    | 50.5      | 7.25     |
| nucleus;nucleus;regulation of transcription, DNA- TF_bZIP  |                                    | 220.94    | 450.09   |
| nucleus;regulation of transcription, DNA-templat Pou       |                                    | 77.85     | 20.36    |
| RNA binding;nucleus;nucleus;chromatin organization;DNA     |                                    | 124.67    | 33.27    |
|                                                            |                                    | 219       | 102.27   |
|                                                            |                                    | 106.66    | 222.47   |
|                                                            |                                    | 149.11    | 62.66    |

|                                                                                                    |                                                             |           |          |
|----------------------------------------------------------------------------------------------------|-------------------------------------------------------------|-----------|----------|
| serine-type hsa:5328                                                                               | hsa04064;hs NF-kappa B signaling                            | 75.35     | 183.57   |
| nucleic acid binding;metal ion binding;regulation of transcription, DNA-dependent                  |                                                             | 190.72    | 90.61    |
| nucleus;nucleus;cytoplasm;cytoplasm;cytosol;mitochondrion                                          | hsa:2118 hsa05202 Transcription, DNA-dependent              | 47.48     | 144.29   |
|                                                                                                    |                                                             | 139.52    | 53.46    |
| structural molecule                                                                                | hsa:3885 hsa04915;hs Estrogen signaling pathway             | 19.07     | 90.14    |
| positive regulation of transcription, DNA-dependent                                                | hsa:3303 hsa03040;hs Spliceosome biogenesis                 | 112.49    | 247.88   |
| nucleus;nucleus;cytoplasm;cytoplasm;cytosol;mitochondrion                                          |                                                             | 228.46    | 111.63   |
|                                                                                                    |                                                             | 116.56    | 42.67    |
|                                                                                                    |                                                             | 73.54     | 18.72    |
|                                                                                                    |                                                             | 109.67    | 234.38   |
| nucleic acid binding;regulation of transcription, DNA-dependent                                    | hsa:9310 hsa05168 Herpes simplex virus replication          | 127.91    | 50.02    |
|                                                                                                    |                                                             | 117.32    | 40.51    |
| nucleus;cytoplasm;cytoplasm;cytosol;mitochondrion                                                  | hsa:2324 hsa04010;hs MAPK signaling pathway                 | 102.37    | 214.65   |
| nucleus;mercury ion binding                                                                        | hsa:489 hsa04020;hs Calcium signaling pathway               | 58.71     | 151.15   |
| nucleic acid binding;regulation of transcription, DNA-dependent                                    |                                                             | 199.87    | 96.87    |
|                                                                                                    |                                                             | 105.79    | 36.01    |
|                                                                                                    |                                                             | 89.86     | 23.94    |
|                                                                                                    |                                                             | 59.99     | 12.35    |
|                                                                                                    |                                                             | 128727.18 | 59385.13 |
|                                                                                                    |                                                             | 57.84     | 12.71    |
|                                                                                                    |                                                             | 83.93     | 183.96   |
|                                                                                                    |                                                             | 65.12     | 14.46    |
| cytoplasm;membrane;integral component of membrane;protein                                          |                                                             | 60.56     | 13.76    |
| cytoplasm;carbohydrate binding;carbohydrate binding;glycosyltransferase activity                   |                                                             | 155.42    | 313.13   |
| positive regulation of transcription, DNA-dependent                                                | hsa:3304 hsa03040;hs Spliceosome biogenesis                 | 1432.72   | 2953.27  |
| cytoplasm;transferase activity;protein ubiquitination;protein                                      |                                                             | 190.76    | 93.54    |
| nucleus;nucleus;cytoplasm;cytoplasm;cytosol;mitochondrion                                          | hsa:3012 hsa04217;hs Necroptosis signaling                  | 100.62    | 24.77    |
|                                                                                                    |                                                             | 14.53     | 66.45    |
| membrane;integral component of membrane                                                            |                                                             | 101.08    | 34.55    |
| nucleus;nucleus;cytoplasm;cytoplasm;cytosol;mitochondrion                                          | hsa:1846 hsa04010 MAPK signaling pathway                    | 39.87     | 113.25   |
|                                                                                                    |                                                             | 62.04     | 148.52   |
|                                                                                                    |                                                             | 56.68     | 12.53    |
| extracellular region;insulin-like growth factor binding;regulation of transcription, DNA-dependent |                                                             | 3.06      | 42.77    |
|                                                                                                    |                                                             | 52.36     | 11.01    |
|                                                                                                    |                                                             | 48.35     | 9.45     |
| membrane;regulation of transcription, DNA-dependent                                                | hsa:1577 hsa00140;hs Steroid hormone biosynthesis           | 98.43     | 34.5     |
| positive regulation of transcription, DNA-dependent                                                | hsa:6662 hsa04024 cAMP signal transduction                  | 26.58     | 93.51    |
| cytoplasm;nucleus;nucleus;cytoplasm;cytoplasm;cytosol;mitochondrion                                | hsa:10125 hsa04010;hs MAPK signaling pathway                | 112.53    | 42.7     |
| growth factor binding                                                                              | hsa:3625 hsa04060;hs Cytokine-cytokine receptor interaction | 39.3      | 111.38   |
|                                                                                                    |                                                             | 189.25    | 82.92    |
| extracellular region;extracellular region;molecular function                                       |                                                             | 36.77     | 4.35     |
|                                                                                                    |                                                             | 60.74     | 13.33    |
|                                                                                                    |                                                             | 44.87     | 8.23     |
|                                                                                                    |                                                             | 130.28    | 55.36    |
| extracellular region;protein binding;insulin-like growth factor binding                            |                                                             | 65.89     | 149.47   |
| RNA binding;nucleus;nucleus;nucleolus;nucleoplasm                                                  | hsa: ARID                                                   | 82.55     | 176.79   |
|                                                                                                    |                                                             | 42.36     | 6.41     |
| membrane;integral component of membrane;calcium ion binding                                        |                                                             | 55.35     | 12.83    |

|                                                                |                                    |        |        |
|----------------------------------------------------------------|------------------------------------|--------|--------|
| intracellular;regulation of signaling receptor activity;extrac |                                    | 44.78  | 116.65 |
|                                                                |                                    | 68.01  | 19.9   |
| extracellular region;signaling receptor binding;transmembr     |                                    | 76.22  | 20.82  |
|                                                                |                                    | 137.47 | 55.59  |
|                                                                |                                    | 65.75  | 16.53  |
| negative reg hsa:3728                                          | hsa05200;hs Pathways in cancer ;T  | 58.96  | 147.5  |
| membrane;( hsa:2793                                            | hsa04014;hs Ras signaling pathwa   | 42.76  | 111.05 |
| membrane;r hsa:4729                                            | hsa00190;hs Oxidative phosphory    | 80.09  | 25.31  |
|                                                                |                                    | 140.4  | 61.25  |
|                                                                |                                    | 98.06  | 36.6   |
| nucleus;nuc hsa:8350                                           | hsa05034;hs Alcoholism ;Shigellos  | 31.64  | 3.06   |
|                                                                |                                    | 70.49  | 20.95  |
| membrane;integral component of membrane;transferase a          |                                    | 79.09  | 26.49  |
| nucleic acid hsa:353355                                        | hsa05168 Herpes simp zf-C2H2       | 76.99  | 23.51  |
| nucleus;nuc hsa:8329                                           | hsa04217;hs Necroptosis ;Alcoholi  | 60.86  | 12.33  |
|                                                                |                                    | 47.92  | 9.63   |
| nucleus;nuc hsa:8347                                           | hsa05034;hs Alcoholism ;Viral carc | 84.38  | 21.61  |
| nucleus;nuc hsa:8339                                           | hsa05034;hs Alcoholism ;Viral carc | 121.03 | 36.6   |
|                                                                |                                    | 59.52  | 14.12  |
| nucleus;nucleus;cytoplasm;cytoplasm;endoplasmic reticulu       |                                    | 145.71 | 66.77  |
| membrane;plasma membrane;cell junction;synapse;postsyl         |                                    | 75.01  | 23.85  |
|                                                                |                                    | 82.07  | 22.84  |
| extracellular region;extracellular space;extracellular space;e |                                    | 46.34  | 116.64 |
|                                                                |                                    | 40.63  | 6.28   |
|                                                                |                                    | 38.03  | 5.76   |
|                                                                |                                    | 126.3  | 53.12  |
|                                                                |                                    | 82.03  | 27.53  |
| nucleus;cytc hsa:9863                                          | hsa04015;hs Rap1 signaling pathw   | 180.66 | 85.67  |
|                                                                |                                    | 57.73  | 14.5   |
|                                                                |                                    | 65.62  | 17.8   |
|                                                                |                                    | 83.53  | 25.18  |
| membrane;integral component of membrane;integral com           |                                    | 54.11  | 12.21  |
| nucleus;nucleus;metal ion binding;transcription b Others       |                                    | 59.83  | 14.63  |
|                                                                |                                    | 37.46  | 6.37   |
|                                                                |                                    | 27.9   | 85.64  |
|                                                                |                                    | 102.2  | 40.29  |
| extracellular space;extracellular space;protein binding;extra  |                                    | 76.09  | 161.29 |
|                                                                |                                    | 85.19  | 29.99  |
| dephosphoi hsa:30833                                           | hsa00230;hs Purine metabolism ;P   | 83.08  | 168.35 |
|                                                                |                                    | 61.2   | 17.29  |
|                                                                |                                    | 42.91  | 8.14   |
| protein binding;extracellular region;leukocyte migration;ex    |                                    | 63.94  | 17.05  |
| protein binding                                                |                                    | 78.8   | 165.37 |
|                                                                |                                    | 37.85  | 6.41   |
|                                                                |                                    | 87.04  | 31.37  |
| membrane;i hsa:10161                                           | hsa04072;hs Phospholipase D sigr   | 74.35  | 23.39  |
| cytoplasm;n hsa:56171                                          | hsa05014;hs Amyotrophic lateral s  | 130.76 | 59.98  |
| nucleus;nucleus;cytoplasm;cytoskeleton;protein binding;ce      |                                    | 132.07 | 264.62 |

|                                                                                       |                                    |        |        |
|---------------------------------------------------------------------------------------|------------------------------------|--------|--------|
| nucleus;cytc hsa:347733                                                               | hsa04145;hs Phagosome ;Gap jun     | 59.68  | 141.05 |
|                                                                                       |                                    | 146.71 | 71.29  |
|                                                                                       |                                    | 58.08  | 129.58 |
|                                                                                       |                                    | 97.06  | 34.36  |
| positive reg hsa:51176                                                                | hsa04310;hs Wnt signalir HMG       | 20.02  | 69.91  |
|                                                                                       |                                    | 72.92  | 23.11  |
|                                                                                       |                                    | 42.78  | 8.76   |
|                                                                                       |                                    | 98.86  | 38.41  |
| membrane;integral component of membrane;calcium ion t                                 |                                    | 63.34  | 19.58  |
|                                                                                       |                                    | 31.75  | 4.33   |
| positive reg hsa:783                                                                  | hsa04010;hs MAPK signaling path    | 108.52 | 46.88  |
|                                                                                       |                                    | 50.48  | 12.4   |
|                                                                                       |                                    | 35.1   | 5.07   |
|                                                                                       |                                    | 60.45  | 16.76  |
|                                                                                       |                                    | 70.99  | 150.14 |
|                                                                                       |                                    | 53.67  | 13.49  |
|                                                                                       |                                    | 160.95 | 79.05  |
|                                                                                       |                                    | 35.51  | 5.76   |
| growth factc hsa:2919                                                                 | hsa04060;hs Cytokine-cytokine re   | 8.4    | 45.33  |
| membrane;i hsa:3776                                                                   | hsa04927;hs Cortisol synthesis anc | 47.75  | 112.65 |
| membrane;i hsa:8707                                                                   | hsa00601;hs Glycosphingolipid bi   | 59.97  | 17.58  |
|                                                                                       |                                    | 168.62 | 77.18  |
| cytoplasm;cytoplasm;membrane;integral component of membrane;transmembrane transport;i |                                    |        |        |
|                                                                                       |                                    | 41.43  | 8.11   |
| membrane;i hsa:51208                                                                  | hsa04514;hs Cell adhesion molecu   | 76.34  | 25.06  |
| nucleic acid binding;nucleus;metal ion binding;Df zf-C2H2                             |                                    | 108.73 | 218.25 |
|                                                                                       |                                    | 397.98 | 106.37 |
|                                                                                       |                                    | 63.35  | 18.89  |
|                                                                                       |                                    | 135.54 | 55.16  |
|                                                                                       |                                    | 49.21  | 12.31  |
| cytoplasm;n hsa:1768                                                                  | hsa05014;hs Amyotrophic lateral s  | 103.99 | 42.01  |
|                                                                                       |                                    | 111.53 | 49.39  |
|                                                                                       |                                    | 45.95  | 10.86  |
| positive reg hsa:8792                                                                 | hsa04060;hs Cytokine-cytokine re   | 56.14  | 123.25 |
|                                                                                       |                                    | 35.33  | 5.93   |
| membrane;integral component of membrane;voltage-gate                                  |                                    | 44.44  | 108.11 |
|                                                                                       |                                    | 81.72  | 31.09  |
|                                                                                       |                                    | 55.74  | 15.45  |
| membrane;integral component of membrane;membrane;ir                                   |                                    | 132.35 | 63.56  |
| nucleic acid binding;regulation of transcription, DNA-temp                            |                                    | 56.71  | 15.55  |
|                                                                                       |                                    | 74.44  | 26.81  |
| nucleus;nuc hsa:8352                                                                  | hsa05034;hs Alcoholism ;Shigellos  | 34.01  | 5.02   |
| nucleus;nuc hsa:8332                                                                  | hsa04217;hs Necroptosis ;Alcoholi  | 68.77  | 15.71  |
|                                                                                       |                                    | 125.64 | 57.37  |
|                                                                                       |                                    | 76.1   | 25.54  |

|                                                                |            |                                    |        |        |
|----------------------------------------------------------------|------------|------------------------------------|--------|--------|
|                                                                |            |                                    | 43.03  | 10.15  |
|                                                                |            |                                    | 75.88  | 25.01  |
|                                                                |            |                                    | 56.05  | 16.51  |
| nucleic acid                                                   | hsa:54753  | hsa05168 Herpes simp               | 35.19  | 91.02  |
|                                                                |            |                                    | 119.34 | 51.71  |
|                                                                |            |                                    | 140.35 | 69.94  |
| cytoplasm;n                                                    | hsa:10846  | hsa00230;hs Purine metabolism ;N   | 137.54 | 66.85  |
| membrane;i                                                     | hsa:3769   | hsa04974 Protein digestion anc     | 53.54  | 14.48  |
| cytoplasm;c                                                    | hsa:1848   | hsa04010;hs MAPK signaling path    | 40.42  | 105.43 |
|                                                                |            |                                    | 40.71  | 9.26   |
|                                                                |            |                                    | 88.14  | 36.3   |
| cytoplasm;c                                                    | hsa:998    | hsa04010;hs MAPK signaling path    | 74.88  | 27.53  |
|                                                                |            |                                    | 70.81  | 24.84  |
|                                                                |            |                                    | 26.15  | 3.03   |
| cytoplasm;actin binding;cytoskeleton;protein binding;actin     |            |                                    | 111.07 | 48.53  |
| GTPase regulator activity;regulation of catalytic activity;cyt |            |                                    | 83.3   | 168.82 |
|                                                                |            |                                    | 7.15   | 40.07  |
| membrane;i                                                     | hsa:259293 | hsa04742 Taste transduction        | 27.49  | 3.51   |
| membrane;i                                                     | hsa:81466  | hsa04740 Olfactory transductio     | 25.51  | 2.52   |
| GTPase activ                                                   | hsa:5874   | hsa04972 Pancreatic secretion      | 42.91  | 104.36 |
|                                                                |            |                                    | 66.28  | 22.09  |
| phosphatidy                                                    | hsa:3613   | hsa00562;hs Inositol phosphate m   | 68.32  | 144.68 |
| nucleus;nuc                                                    | hsa:8348   | hsa05034;hs Alcoholism ;Viral carc | 46.13  | 10.69  |
|                                                                |            |                                    | 58.45  | 15.26  |
|                                                                |            |                                    | 71.29  | 25.91  |
|                                                                |            |                                    | 74.18  | 28.13  |
|                                                                |            |                                    | 34.64  | 5.96   |
|                                                                |            |                                    | 107.23 | 48.36  |
| membrane;integral component of membrane;calcium ion t          |            |                                    | 38.77  | 8.69   |
| membrane;integral component of membrane;G protein-co           |            |                                    | 36.34  | 7.68   |
| nucleus;nuc                                                    | hsa:8345   | hsa05034;hs Alcoholism ;Viral carc | 102.41 | 40.92  |
| kinase activity;phosphorylation;calmodulin binding;phosp       |            |                                    | 15.95  | 55.47  |
|                                                                |            |                                    | 24.58  | 2.55   |
| membrane;c                                                     | hsa:5228   | hsa04010;hs MAPK signaling path    | 34.92  | 87.39  |
|                                                                |            |                                    | 79.77  | 30.52  |
|                                                                |            |                                    | 78.11  | 30.84  |
| nucleus;nuc                                                    | hsa:8342   | hsa05034;hs Alcoholism ;Viral carc | 40.34  | 7.41   |
|                                                                |            |                                    | 118.55 | 56.93  |
| nucleus;intracellular membrane-bounded organelle;metal         |            |                                    | 105.5  | 47.4   |
|                                                                |            |                                    | 109.14 | 48.74  |
| intracellular;nucleotide binding;protein kinase activity;prot  |            |                                    | 60.08  | 126.57 |
| membrane;r                                                     | hsa:54344  | hsa00510;hs N-Glycan biosynthes    | 43.98  | 102.18 |
| intracellular                                                  | hsa:25759  | hsa01521;hs EGFR tyrosine kinase   | 49.68  | 112.09 |
| nucleus;nuc                                                    | hsa:8343   | hsa05034;hs Alcoholism ;Viral carc | 58.2   | 12.97  |
|                                                                |            |                                    | 89.83  | 37.33  |
| positive regulation of endothelial cell migration;p Fork_he    |            |                                    | 43.63  | 103.73 |
|                                                                |            |                                    | 47.77  | 12.39  |
| extracellular                                                  | hsa:3053   | hsa04610 Complement and coa        | 45.12  | 12.29  |

|                                                           |        |        |
|-----------------------------------------------------------|--------|--------|
| membrane;integral component of membrane;integral com      | 45.87  | 104.1  |
| nucleus;metal ion binding;nucleolus;nucleus;metal ion bin | 75.69  | 29.19  |
|                                                           | 24.25  | 2.5    |
| protein kina hsa:729597 hsa04114;hs Oocyte meiosis ;Prog  | 109.29 | 51.88  |
|                                                           | 90.66  | 37.11  |
|                                                           | 33.73  | 6.93   |
|                                                           | 38.57  | 8.33   |
| extracellular region;female pregnancy                     | 31.86  | 5.88   |
| membrane;i hsa:259290 hsa04742 Taste transduction         | 35.19  | 7.62   |
|                                                           | 67.56  | 24.97  |
|                                                           | 17.54  | 57.73  |
| RNA bindin hsa:8365 hsa05034;hs Alcoholism ;Viral carc    | 128.9  | 52.09  |
| positive reg hsa:1958 hsa04371;hs Apelin signa zf-C2H2    | 134.34 | 497.94 |
|                                                           | 35.83  | 7.61   |
|                                                           | 33.23  | 6.46   |
| membrane;i hsa:338707 hsa00513;hs Various types of N-g    | 68.92  | 138.93 |
|                                                           | 42.16  | 10.97  |
| oxidoreduct hsa:217 hsa00010;hs Glycolysis / Gluconec     | 44.88  | 102.62 |
|                                                           | 43.4   | 11.6   |
| membrane;integral component of membrane;calcium ion b     | 42.03  | 9.86   |
|                                                           | 27.28  | 3.6    |
| membrane;integral component of membrane;transmembra       | 106.91 | 51.39  |
| cytoplasm;cytoskeleton;protein binding;perinuclear region | 15.76  | 54.78  |
|                                                           | 113.85 | 51.86  |
|                                                           | 20.44  | 1.56   |
|                                                           | 44.34  | 100.97 |
| membrane;integral component of membrane;calcium ion b     | 103.56 | 47.17  |
| membrane;i hsa:9934 hsa04080 Neuroactive ligand-r         | 34.43  | 6.43   |
| nucleus;nuc hsa:8346 hsa05034;hs Alcoholism ;Viral carc   | 39.88  | 8.65   |
| membrane;integral component of membrane;calcium ion b     | 65.77  | 24.4   |
| nucleus;nucleus;cytoplasm;cytoplasm;nucleoplasm;tRNA p    | 59.18  | 124.72 |
| metal ion bi hsa:4832 hsa00230;hs Purine metabolism ;P    | 47.71  | 108.81 |
| cytoplasm;nucleotide binding;ATP binding;motor activity;a | 30.54  | 81.86  |
|                                                           | 30.78  | 4.99   |
| extracellular hsa:27329 hsa04979 Cholesterol metaboli     | 54.35  | 16.91  |
|                                                           | 73.58  | 25.11  |
|                                                           | 36.82  | 8.68   |
|                                                           | 50.36  | 16.08  |
|                                                           | 94.57  | 42.4   |
|                                                           | 96.52  | 43.57  |
|                                                           | 67.53  | 26.14  |
|                                                           | 28.7   | 5.12   |
|                                                           | 27.03  | 4.55   |
| nucleus;nuc hsa:8358 hsa05034;hs Alcoholism ;Shigellos    | 123.36 | 21.57  |
|                                                           | 37.95  | 9.05   |
| transformin hsa:2353 hsa01522;hs Endocrine re TF_bZIP     | 55.62  | 126.3  |
| cytoplasm;cytoskeleton;protein binding;centrosome;microt  | 57.58  | 116.16 |
| membrane;c hsa:6900 hsa04514 Cell adhesion molecu         | 35.56  | 8.33   |

|                                                              |         |        |
|--------------------------------------------------------------|---------|--------|
|                                                              | 38.36   | 8.95   |
| nucleic acid binding;nucleus;metal ion binding;Df zf-C2H2    | 43.86   | 12.84  |
| membrane;i hsa:64101 hsa04360;hs Axon guidance ;Cell a       | 56.35   | 18.3   |
| protein binding;protein binding;protein binding;protein bi   | 56.72   | 116.58 |
|                                                              | 49.69   | 15.11  |
|                                                              | 58.4    | 19.64  |
| nucleic acid binding;nucleus;DNA binding;actin filament bi   | 58.26   | 118.64 |
|                                                              | 47.82   | 14.76  |
|                                                              | 41.02   | 11.1   |
|                                                              | 65.56   | 24.64  |
|                                                              | 6483.82 | 1862   |
| nucleic acid hsa:163050 hsa05168 Herpes simp zf-C2H2         | 73.69   | 28.21  |
|                                                              | 31.09   | 6.14   |
|                                                              | 27.58   | 5.12   |
|                                                              | 87.05   | 36.76  |
|                                                              | 40.97   | 10.54  |
| membrane;i hsa:6554 hsa04976;hs Bile secretion ;Hepati       | 42.71   | 10.21  |
| extracellular region;female pregnancy;extracellular region;f | 122.96  | 58.53  |
| extracellular region;neuropeptide signaling pathway;molec    | 39.71   | 93.03  |
| molecular_function;cellular_component;nervous system de      | 23.82   | 83.25  |
| extracellular space;metal ion binding;calcium ion binding;s  | 22.12   | 2.8    |
|                                                              | 78.91   | 31.49  |
|                                                              | 43.19   | 11.57  |
| signaling re hsa:7477 hsa04150;hs mTOR signaling path        | 11.12   | 42.64  |
|                                                              | 1256.19 | 100.04 |
| cytoplasm;cytoplasm;cytoplasm                                | 47.18   | 13.93  |
|                                                              | 26.82   | 4.63   |
| endoplasmic reticulum;endoplasmic reticulum;Golgi appar      | 49.83   | 15.97  |
|                                                              | 67.61   | 25.46  |
| nucleus;nuc hsa:8354 hsa05034;hs Alcoholism ;Shigellos       | 44.17   | 9.65   |
|                                                              | 37.42   | 9.03   |
| membrane;integral component of membrane;plasma mem           | 38.68   | 10.26  |
| membrane;integral component of membrane;calcium ion b        | 36.95   | 7.45   |
| membrane;integral component of membrane;ion transport        | 45.38   | 98.08  |
| protein binc hsa:284340 hsa04060 Cytokine-cytokine re        | 34.27   | 8.24   |
|                                                              | 59.1    | 22.26  |
|                                                              | 31.4    | 5.77   |
| nucleic acid hsa:10794 hsa05168 Herpes simp zf-C2H2          | 424.05  | 170.78 |
| nucleus;nucleoplasm;nucleus;nucleus;DNA-binding transc       | 46.82   | 102.61 |
|                                                              | 51.43   | 15.56  |
|                                                              | 71.64   | 29.44  |
| nucleus;nucleoplasm;transcription by RNA polym HMG           | 38.61   | 88.35  |
|                                                              | 30.89   | 6.23   |
|                                                              | 41.46   | 11.93  |
| protein binding;protein binding;protein binding;protein bi   | 64.98   | 25.78  |
|                                                              | 54.48   | 122.88 |
|                                                              | 59.46   | 21.34  |
|                                                              | 43.38   | 12.77  |



|                                                                |                                    |        |       |
|----------------------------------------------------------------|------------------------------------|--------|-------|
|                                                                |                                    | 63.46  | 22.22 |
|                                                                |                                    | 57.19  | 19.28 |
| membrane;integral component of membrane;Wnt signalin           |                                    | 22.58  | 61.33 |
|                                                                |                                    | 61.04  | 17.32 |
| metal ion bi hsa:285                                           | hsa04010;hs MAPK signaling path    | 28.51  | 5.85  |
|                                                                |                                    | 33.27  | 7.7   |
|                                                                |                                    | 62.44  | 22.6  |
|                                                                |                                    | 24.49  | 3.33  |
|                                                                |                                    | 65.69  | 26.75 |
|                                                                |                                    | 49.47  | 15.97 |
|                                                                |                                    | 36.28  | 9.7   |
|                                                                |                                    | 32.96  | 7.07  |
| metal ion binding;2 iron, 2 sulfur cluster binding;intracellul |                                    | 53.97  | 109.3 |
|                                                                |                                    | 68.14  | 28.58 |
|                                                                |                                    | 24.48  | 4.15  |
|                                                                |                                    | 55.31  | 18.77 |
|                                                                |                                    | 29.14  | 5.59  |
|                                                                |                                    | 38.64  | 10.02 |
|                                                                |                                    | 64.42  | 25.66 |
| protein binding;extracellular region;response to oxidative s   |                                    | 29.68  | 6.62  |
| nucleus;cytoplasm;regulation of transcription, DNA-templ       |                                    | 27.72  | 68.69 |
|                                                                |                                    | 34.59  | 8.33  |
|                                                                |                                    | 49.7   | 15.83 |
| nucleic acid binding;RNA binding;nucleic acid binding;RN/      |                                    | 75.41  | 32.72 |
|                                                                |                                    | 22.05  | 2.53  |
|                                                                |                                    | 19.76  | 2.3   |
|                                                                |                                    | 36.35  | 9.57  |
| membrane;i hsa:93589                                           | hsa04010;hs MAPK signaling path    | 35.83  | 80.97 |
|                                                                |                                    | 105.97 | 52.03 |
|                                                                |                                    | 32.55  | 8.11  |
|                                                                |                                    | 22.88  | 3.11  |
|                                                                |                                    | 30.57  | 6.55  |
|                                                                |                                    | 38.71  | 11.22 |
| RNA binding; hsa:8366                                          | hsa05034;hs Alcoholism ;Viral carc | 44.15  | 11.73 |
| nucleus;nuc hsa:5798                                           | hsa04940 Type I diabetes mellit    | 37.58  | 84.84 |
|                                                                |                                    | 85.46  | 39.4  |
| cytoplasm;c hsa:9108                                           | hsa00562;hs Inositol phosphate m   | 69.16  | 27.61 |
| nucleus;nucleus;nucleus;cytoplasm;regulation of HMG            |                                    | 49.02  | 104   |
|                                                                |                                    | 44.81  | 14.18 |
| membrane;i hsa:401494                                          | hsa00062;hs Fatty acid elongation  | 38.55  | 11.23 |
| hydrolase activity;mitochondrion;molecular_function;biolo      |                                    | 45.24  | 97.21 |
| cytoplasm;n hsa:23057                                          | hsa00760;hs Nicotinate and nicoti  | 35.82  | 81.23 |
|                                                                |                                    | 23.55  | 3.86  |
|                                                                |                                    | 35.87  | 8.86  |
| membrane;membrane;integral component of membrane;n             |                                    | 37.57  | 82.88 |
| actin filamer hsa:11151                                        | hsa04145;hs Phagosome ;Tubercu     | 23.06  | 63.11 |
| nucleus;damaged DNA binding;single strand break repair;r       |                                    | 98.55  | 48.14 |
|                                                                |                                    | 16.26  | 1.04  |

|                                                                                                                         |          |          |
|-------------------------------------------------------------------------------------------------------------------------|----------|----------|
| membrane;integral component of membrane;calcium ion t                                                                   | 51.83    | 19.13    |
|                                                                                                                         | 33.88    | 8.82     |
|                                                                                                                         | 29.89    | 6.49     |
|                                                                                                                         | 44.1     | 13.91    |
|                                                                                                                         | 26.94    | 67.36    |
| extracellular space;positive regulation of ERK1 and ERK2 ca<br>intracellular; hsa:3576 hsa04060;hs Cytokine-cytokine re | 17.63    | 53.53    |
|                                                                                                                         | 30.87    | 7.63     |
|                                                                                                                         | 21.12    | 62.57    |
|                                                                                                                         | 65.1     | 27.6     |
|                                                                                                                         | 38.58    | 10.41    |
|                                                                                                                         | 57060.76 | 810.08   |
|                                                                                                                         | 47.62    | 16.67    |
|                                                                                                                         | 52.53    | 108.99   |
|                                                                                                                         | 53.02    | 18.83    |
|                                                                                                                         | 43.79    | 14.61    |
|                                                                                                                         | 30.84    | 7.73     |
|                                                                                                                         | 46.06    | 15.04    |
|                                                                                                                         | 49.85    | 16.09    |
| protein binding;intermediate filament;keratin filament;cytc                                                             | 16.53    | 1.02     |
|                                                                                                                         | 19.75    | 2.26     |
|                                                                                                                         | 1.95     | 22.48    |
|                                                                                                                         | 62.63    | 25.92    |
|                                                                                                                         | 63.35    | 25.67    |
|                                                                                                                         | 59.65    | 23.67    |
|                                                                                                                         | 32.74    | 7.98     |
|                                                                                                                         | 58.2     | 23.08    |
|                                                                                                                         | 51.06    | 17.2     |
|                                                                                                                         | 70.82    | 28.99    |
| cytoplasm;membrane;nucleotide binding;ATP binding;plas                                                                  | 47.62    | 99.45    |
|                                                                                                                         | 89314.14 | 15295.95 |
|                                                                                                                         | 24.88    | 4.11     |
|                                                                                                                         | 25.6     | 5.19     |
|                                                                                                                         | 51.08    | 13.18    |
| hydrolase activity;peptidase activity;proteolysis;extracellula                                                          | 60.01    | 23.42    |
|                                                                                                                         | 23.65    | 4.57     |
|                                                                                                                         | 34.43    | 8.29     |
|                                                                                                                         | 23.91    | 4.19     |
|                                                                                                                         | 73.4     | 31.54    |
|                                                                                                                         | 56.81    | 22.17    |
| cytoplasm;c hsa:397 hsa04722;hs Neurotrophin signali<br>oxidation-rε hsa:2877 hsa00480;hs Glutathione metaboli          | 39.46    | 83.95    |
|                                                                                                                         | 49.3     | 17.55    |
|                                                                                                                         | 87.87    | 42.99    |
|                                                                                                                         | 22.55    | 3.87     |
|                                                                                                                         | 40.6     | 11.5     |
|                                                                                                                         | 45.63    | 94.81    |
|                                                                                                                         | 40.69    | 87.62    |
| membrane;r hsa:2657 hsa04060 Cytokine-cytokine re                                                                       | 37.15    | 10.75    |
|                                                                                                                         | 43.8     | 13.99    |

|                                                             |  |  |           |          |
|-------------------------------------------------------------|--|--|-----------|----------|
|                                                             |  |  | 33.7      | 9.52     |
|                                                             |  |  | 20.61     | 2.84     |
|                                                             |  |  | 70.98     | 31.08    |
|                                                             |  |  | 53.6      | 20.22    |
|                                                             |  |  | 38.39     | 11.03    |
| membrane;integral component of membrane;membrane;ir         |  |  | 48.17     | 96.27    |
|                                                             |  |  | 52.51     | 18.94    |
| nucleus;nuc hsa:225689 hsa04657 IL-17 signaling pathv       |  |  | 25.02     | 64.78    |
| intracellular; hsa:8642 hsa04392 Hippo signaling path       |  |  | 49.67     | 99.99    |
|                                                             |  |  | 26.11     | 5.62     |
|                                                             |  |  | 36.97     | 11.14    |
|                                                             |  |  | 27.99     | 5.84     |
| membrane;integral component of membrane;tRNA proces:        |  |  | 63.87     | 26.49    |
|                                                             |  |  | 21.95     | 3.61     |
|                                                             |  |  | 20.07     | 3.1      |
|                                                             |  |  | 8.63      | 0        |
|                                                             |  |  | 83.84     | 40       |
|                                                             |  |  | 48.44     | 17.05    |
|                                                             |  |  | 41.74     | 13.59    |
|                                                             |  |  | 140749.94 | 18120    |
|                                                             |  |  | 25.64     | 4.87     |
|                                                             |  |  | 40.07     | 12.62    |
|                                                             |  |  | 24.28     | 4.83     |
|                                                             |  |  | 35.21     | 9.06     |
|                                                             |  |  | 42.46     | 14.6     |
|                                                             |  |  | 32.07     | 8.54     |
|                                                             |  |  | 35.48     | 9.88     |
|                                                             |  |  | 45.65     | 15.82    |
|                                                             |  |  | 27.46     | 6.05     |
|                                                             |  |  | 59.78     | 24.58    |
|                                                             |  |  | 22.28     | 4.06     |
|                                                             |  |  | 91728.36  | 16330.87 |
|                                                             |  |  | 28.61     | 6.96     |
|                                                             |  |  | 37.26     | 8.73     |
| cytoplasm;intracellular transport;nucleus;cytoplasm;centro: |  |  | 74.06     | 31.91    |
|                                                             |  |  | 21.41     | 3.9      |
|                                                             |  |  | 23.08     | 4.56     |
| membrane;integral component of membrane;membrane;ir         |  |  | 36        | 78.83    |
| extracellular hsa:3976 hsa04060;hs Cytokine-cytokine re     |  |  | 53.74     | 108.26   |
|                                                             |  |  | 25.78     | 5.93     |
|                                                             |  |  | 60.35     | 24.95    |
|                                                             |  |  | 14.09     | 0.77     |
|                                                             |  |  | 27.48     | 6.38     |
|                                                             |  |  | 24.34     | 5.38     |
| membrane;integral component of membrane                     |  |  | 51.73     | 17.61    |
|                                                             |  |  | 28.98     | 7.45     |
|                                                             |  |  | 29.22     | 7.39     |
|                                                             |  |  | 19.43     | 3.02     |

|                                                               |                                    |        |       |
|---------------------------------------------------------------|------------------------------------|--------|-------|
| hsa:79178                                                     | hsa00730;hs Thiamine metabolism    | 50.53  | 19.98 |
|                                                               |                                    | 38.86  | 11.61 |
| protein ubiquitination;intracellular signal transduction;cytc |                                    | 60.69  | 22.54 |
|                                                               |                                    | 35.73  | 11.02 |
| nucleus;endoplasmic reticulum;protein deubiquitination;ul     |                                    | 14.18  | 0.51  |
|                                                               |                                    | 52.66  | 21.07 |
|                                                               |                                    | 47.02  | 17.18 |
|                                                               |                                    | 37.41  | 9.36  |
|                                                               |                                    | 17     | 1.84  |
|                                                               |                                    | 51.68  | 20.18 |
|                                                               |                                    | 29.66  | 7.95  |
|                                                               |                                    | 19.81  | 3.11  |
|                                                               |                                    | 59.8   | 24.04 |
|                                                               |                                    | 50.27  | 17.41 |
|                                                               |                                    | 23.06  | 4.3   |
|                                                               |                                    | 22.02  | 4.36  |
|                                                               |                                    | 39.25  | 82.66 |
|                                                               |                                    | 27.36  | 6.49  |
|                                                               |                                    | 47.99  | 15.82 |
| cytoplasm;extracellular region;extracellular negative regula  |                                    | 57.11  | 24.51 |
|                                                               |                                    | 32.58  | 8.21  |
|                                                               |                                    | 25.88  | 5.87  |
| metal ion binding;endoplasmic reticulum;hydrolase activity    |                                    | 43.67  | 90.66 |
|                                                               |                                    | 21.02  | 3.51  |
| growth factc hsa:83729                                        | hsa04060;hs Cytokine-cytokine re   | 26.56  | 62.97 |
|                                                               |                                    | 22.34  | 4.39  |
|                                                               |                                    | 20.73  | 3.83  |
| cytoplasm;calcium ion binding;cell division;extracellular req |                                    | 38.57  | 13    |
|                                                               |                                    | 48.25  | 17.71 |
|                                                               |                                    | 32.79  | 9.28  |
|                                                               |                                    | 30.38  | 8.12  |
|                                                               |                                    | 28.38  | 7.13  |
|                                                               |                                    | 22.55  | 4.37  |
|                                                               |                                    | 42.15  | 13.72 |
| cytosol;nud hsa:79798                                         | hsa04934 Cushing syndrome          | 41.06  | 84.88 |
|                                                               |                                    | 54.97  | 23.22 |
|                                                               |                                    | 40.29  | 12.21 |
| protein binding;protein binding;protein binding;protein bi    |                                    | 32.15  | 8.65  |
|                                                               |                                    | 51.02  | 19.61 |
| membrane;protein transport;Golgi apparatus;intracellular r    |                                    | 15.76  | 45.35 |
|                                                               |                                    | 21.17  | 4.09  |
| nucleus;nucleoplasm;regulation of transcription, I TF_bZIP    |                                    | 30.29  | 71.44 |
| RNA bindin; hsa:8364                                          | hsa05034;hs Alcoholism ;Viral carc | 232.26 | 61.53 |
| membrane;integral component of membrane;endoplasmic           |                                    | 30.5   | 70.56 |
|                                                               |                                    | 29.55  | 7.47  |
|                                                               |                                    | 13.57  | 0.8   |
|                                                               |                                    | 20.73  | 3.66  |
| cytoplasm;n hsa:415117                                        | hsa04130 SNARE interactions ir     | 32.35  | 8.83  |

|                                                                             |            |          |                                             |       |       |
|-----------------------------------------------------------------------------|------------|----------|---------------------------------------------|-------|-------|
|                                                                             |            |          | 31.88                                       | 7.11  |       |
| RNA binding                                                                 | hsa:23237  | hsa05031 | Amphetamine addict                          | 4.32  | 25.17 |
| membrane;intracellular                                                      | hsa:391191 | hsa04740 | Olfactory transduction                      | 13.76 | 0.98  |
|                                                                             |            |          | 30.85                                       | 8.52  |       |
|                                                                             |            |          | 20                                          | 3.36  |       |
|                                                                             |            |          | 16.24                                       | 1.76  |       |
|                                                                             |            |          | 21.66                                       | 4.39  |       |
|                                                                             |            |          | 22.39                                       | 4.84  |       |
|                                                                             |            |          | 19.22                                       | 2.5   |       |
|                                                                             |            |          | 29.3                                        | 7.95  |       |
|                                                                             |            |          | 32.37                                       | 9.19  |       |
| membrane;intracellular                                                      | hsa:5799   | hsa04940 | Type I diabetes mellitus                    | 17.01 | 47.9  |
|                                                                             |            |          | 31.02                                       | 9.18  |       |
|                                                                             |            |          | 19.85                                       | 3.51  |       |
|                                                                             |            |          | 23.44                                       | 58.68 |       |
|                                                                             |            |          | 54.24                                       | 22.62 |       |
|                                                                             |            |          | 33.9                                        | 10.42 |       |
|                                                                             |            |          | 13.55                                       | 0.71  |       |
|                                                                             |            |          | 24.38                                       | 4.86  |       |
| nucleus;membrane;plasma membrane;cell junction                              |            |          | 39.58                                       | 81.79 |       |
| membrane;plasma membrane;plasma membrane;protein binding                    |            |          | 61.68                                       | 27.4  |       |
|                                                                             |            |          | 29.29                                       | 7.92  |       |
|                                                                             |            |          | 29.3                                        | 7.05  |       |
| nucleus;nucleus                                                             | hsa:1410   | hsa04141 | Protein processing in endoplasmic reticulum | 14.71 | 42.57 |
|                                                                             |            |          | 17.25                                       | 2.37  |       |
| cytoplasm;intracellular                                                     | hsa:1852   | hsa04010 | MAPK signaling pathway                      | 14.7  | 43.23 |
|                                                                             |            |          | 71.85                                       | 32.79 |       |
|                                                                             |            |          | 29.05                                       | 7.67  |       |
|                                                                             |            |          | 22.77                                       | 4.8   |       |
| membrane;integral component of membrane;membrane;intracellular              |            |          | 33.07                                       | 9.45  |       |
|                                                                             |            |          | 41.21                                       | 14.47 |       |
| intracellular;intracellular protein transport;Rab GTPase binding            |            |          | 31.14                                       | 69.42 |       |
|                                                                             |            |          | 16.46                                       | 2.03  |       |
|                                                                             |            |          | 60.58                                       | 26.77 |       |
|                                                                             |            |          | 8.08                                        | 0     |       |
| metal ion binding;protein ubiquitination;protein binding;intracellular      |            |          | 34.53                                       | 75.82 |       |
|                                                                             |            |          | 31.76                                       | 9.55  |       |
| membrane;integral component of membrane;G protein-coupled receptor activity |            |          | 24.39                                       | 5.89  |       |
|                                                                             |            |          | 46.14                                       | 17.43 |       |
|                                                                             |            |          | 49.51                                       | 20.27 |       |
| oxidoreductase                                                              | hsa:7923   | hsa00061 | Fatty acid biosynthesis                     | 32.79 | 71.11 |
|                                                                             |            |          | 17.53                                       | 2.83  |       |
|                                                                             |            |          | 18.13                                       | 3.1   |       |
|                                                                             |            |          | 47.62                                       | 18.66 |       |
|                                                                             |            |          | 48.11                                       | 18.53 |       |
|                                                                             |            |          | 21.65                                       | 4.54  |       |
|                                                                             |            |          | 29.61                                       | 7.87  |       |
|                                                                             |            |          | 35.02                                       | 11.19 |       |

|                                                            |                                  |       |       |
|------------------------------------------------------------|----------------------------------|-------|-------|
|                                                            |                                  | 35.63 | 11.11 |
|                                                            |                                  | 23.01 | 5.15  |
|                                                            |                                  | 69.07 | 33.05 |
| membrane;integral component of membrane;protein bindi      |                                  | 46.78 | 94.21 |
|                                                            |                                  | 30.33 | 8.78  |
|                                                            |                                  | 33.14 | 71.65 |
|                                                            |                                  | 23.76 | 4.8   |
|                                                            |                                  | 53.9  | 21.99 |
|                                                            |                                  | 20.59 | 4.08  |
| membrane;r hsa:3687                                        | hsa04610;hs Complement and coa   | 15.57 | 43.37 |
|                                                            |                                  | 45.88 | 17.04 |
|                                                            |                                  | 23.98 | 5.6   |
|                                                            |                                  | 16.83 | 2.58  |
|                                                            |                                  | 12.76 | 0.8   |
|                                                            |                                  | 17.95 | 2.81  |
|                                                            |                                  | 17.52 | 2.74  |
|                                                            |                                  | 27.73 | 7.62  |
|                                                            |                                  | 37.32 | 12.25 |
|                                                            |                                  | 14.83 | 1.83  |
| cytoplasm;membrane;nucleotide binding;ATP binding;tran     |                                  | 13.95 | 1.28  |
|                                                            |                                  | 21.05 | 3.94  |
| nucleus;nucleus;cytoplasm;protein binding;multicellular or |                                  | 33.89 | 71.03 |
|                                                            |                                  | 23.38 | 5.3   |
| positive regl hsa:28514                                    | hsa01522;hs Endocrine resistance | 35.24 | 73.03 |
|                                                            |                                  | 14.29 | 1.21  |
| cytoplasm;c hsa:874                                        | hsa00590;hs Arachidonic acid met | 25.51 | 60.29 |
|                                                            |                                  | 16.78 | 2.52  |
| membrane;integral component of membrane;plasma mem         |                                  | 24.29 | 56.88 |
|                                                            |                                  | 13.99 | 1.54  |
|                                                            |                                  | 22.79 | 4.82  |
|                                                            |                                  | 37.54 | 13.13 |
| membrane;i hsa:10893                                       | hsa04928 Parathyroid hormone     | 48.13 | 19.53 |
|                                                            |                                  | 7.01  | 0     |
|                                                            |                                  | 58.2  | 25.93 |
|                                                            |                                  | 13.36 | 1.27  |
|                                                            |                                  | 30.8  | 9.4   |
|                                                            |                                  | 17.69 | 2.09  |
|                                                            |                                  | 77.52 | 37.45 |
|                                                            |                                  | 50.61 | 19.58 |
|                                                            |                                  | 21.57 | 4.39  |
|                                                            |                                  | 20.86 | 4.59  |
|                                                            |                                  | 22.35 | 5.18  |
|                                                            |                                  | 22.67 | 5.42  |
|                                                            |                                  | 45.35 | 18.05 |
|                                                            |                                  | 24.7  | 6.32  |
|                                                            |                                  | 31.87 | 9.58  |
|                                                            |                                  | 16.87 | 2.83  |
|                                                            |                                  | 56.04 | 21.97 |

|                                                          |                                   |       |       |
|----------------------------------------------------------|-----------------------------------|-------|-------|
|                                                          |                                   | 13.45 | 38.82 |
|                                                          |                                   | 33.47 | 10.62 |
| membrane;integral component of membrane;multicellular    |                                   | 70.83 | 33.52 |
| nucleus;DN; hsa:85235                                    | hsa04217;hs Necroptosis ;Alcoholi | 27.14 | 6.01  |
|                                                          |                                   | 14.1  | 1.56  |
|                                                          |                                   | 31.72 | 10.02 |
|                                                          |                                   | 68.01 | 31.72 |
|                                                          |                                   | 40.91 | 15.05 |
|                                                          |                                   | 9.83  | 0.24  |
|                                                          |                                   | 18.83 | 3.54  |
|                                                          |                                   | 12.11 | 0.77  |
|                                                          |                                   | 6.72  | 0     |
| membrane;i hsa:51206                                     | hsa04512;hs ECM-receptor interac  | 42.92 | 15.65 |
| membrane;integral component of membrane;calcium ion t    |                                   | 31.22 | 9.06  |
|                                                          |                                   | 22.17 | 5.12  |
|                                                          |                                   | 16.23 | 2.32  |
|                                                          |                                   | 13.97 | 1.28  |
|                                                          |                                   | 31.55 | 9.72  |
|                                                          |                                   | 60.4  | 27.58 |
|                                                          |                                   | 33.55 | 10.51 |
|                                                          |                                   | 15.3  | 2.27  |
|                                                          |                                   | 17.05 | 2.76  |
|                                                          |                                   | 32.14 | 10.32 |
|                                                          |                                   | 27.08 | 7.54  |
|                                                          |                                   | 47.51 | 19.99 |
| membrane;r hsa:29785                                     | hsa00830;hs Retinol metabolism ;l | 8.99  | 31.02 |
|                                                          |                                   | 61.01 | 28.34 |
|                                                          |                                   | 18.95 | 3.78  |
| membrane;i hsa:94030                                     | hsa04514 Cell adhesion molecu     | 30.34 | 66.47 |
|                                                          |                                   | 22.26 | 4.97  |
|                                                          |                                   | 41.61 | 14.5  |
|                                                          |                                   | 15.95 | 2.56  |
|                                                          |                                   | 11.03 | 36.62 |
|                                                          |                                   | 26.88 | 7.48  |
|                                                          |                                   | 20.46 | 4.05  |
|                                                          |                                   | 6.76  | 0     |
|                                                          |                                   | 50.63 | 21.76 |
|                                                          |                                   | 18.07 | 3.35  |
|                                                          |                                   | 31.29 | 66.52 |
|                                                          |                                   | 25.21 | 6.23  |
|                                                          |                                   | 22.91 | 5.68  |
|                                                          |                                   | 9.78  | 32.79 |
|                                                          |                                   | 14.51 | 2.03  |
| cytoplasm;cytoskeleton;centrosome;microtubule organizin  |                                   | 19.86 | 3.83  |
|                                                          |                                   | 18.13 | 3.54  |
| molecular_function;biological_process;cellular_component |                                   | 62.72 | 30.33 |
|                                                          |                                   | 24.79 | 5.81  |
|                                                          |                                   | 35.43 | 10.75 |

|                                                              |       |       |
|--------------------------------------------------------------|-------|-------|
|                                                              | 35.75 | 12.15 |
| membrane;integral component of membrane;metal ion bir        | 38.51 | 14.57 |
|                                                              | 21.38 | 4.8   |
| microtubule hsa:147700 hsa05010;hs Alzheimer disease ;Pæ     | 23.14 | 53.65 |
|                                                              | 47.64 | 19.28 |
|                                                              | 27    | 7.46  |
|                                                              | 18.19 | 3.57  |
|                                                              | 40.75 | 14.83 |
|                                                              | 40.17 | 14.69 |
|                                                              | 15.74 | 2.3   |
|                                                              | 32.68 | 10.93 |
|                                                              | 25.69 | 6.73  |
| cell adhesio hsa:131873 hsa04151;hs PI3K-Akt signaling pæ    | 22.18 | 5.36  |
|                                                              | 19.43 | 3.93  |
|                                                              | 25.55 | 7.38  |
|                                                              | 41.96 | 16.59 |
| lysosome;lysosome;lysosome;lysosome                          | 29.21 | 9.26  |
|                                                              | 28.88 | 8.33  |
|                                                              | 29.14 | 8.88  |
|                                                              | 13.39 | 1.52  |
|                                                              | 22.07 | 5.62  |
| RNA binding;RNA binding;mRNA transport;nucleus;nucleu        | 53.3  | 22.57 |
|                                                              | 39.08 | 13.6  |
|                                                              | 25.27 | 6.52  |
|                                                              | 25.86 | 6.42  |
|                                                              | 13.03 | 1.28  |
|                                                              | 4.5   | 21.77 |
|                                                              | 17.39 | 3.11  |
|                                                              | 33.72 | 11.71 |
|                                                              | 52.39 | 22.36 |
|                                                              | 24.91 | 5.96  |
| nucleus;regulation of transcription, DNA-templat Homeob      | 33.49 | 69.74 |
|                                                              | 16.18 | 2.82  |
| methylated histone binding;methylated histone binding;m      | 25.85 | 4.82  |
|                                                              | 26.25 | 7.69  |
| nucleus;zinc hsa:2100 hsa01522;hs Endocrine ræ ESR-like      | 43.67 | 17.98 |
|                                                              | 17.57 | 3.38  |
|                                                              | 29.29 | 9.14  |
| membrane;integral component of membrane;ion transport        | 48.13 | 20.55 |
|                                                              | 22.62 | 5.49  |
|                                                              | 17.12 | 3.13  |
| actin binding;cell projection;cytoplasm;actin filament bindi | 7.13  | 27.61 |
|                                                              | 53.58 | 23.4  |
|                                                              | 48.68 | 21.33 |
|                                                              | 29.73 | 9.44  |
|                                                              | 51.33 | 21.96 |
| membrane;integral component of membrane;integral comj        | 31.81 | 10.33 |
|                                                              | 13.77 | 1.75  |



|                                                                    |                                   |       |       |
|--------------------------------------------------------------------|-----------------------------------|-------|-------|
|                                                                    |                                   | 38.3  | 13.8  |
|                                                                    |                                   | 25.08 | 6.76  |
|                                                                    |                                   | 18.08 | 3.4   |
|                                                                    |                                   | 25.45 | 6.34  |
|                                                                    |                                   | 46.61 | 19.1  |
|                                                                    |                                   | 56.44 | 24.93 |
| catalytic acti hsa:81616                                           | hsa00061;hs Fatty acid biosynthes | 61.5  | 29.54 |
|                                                                    |                                   | 27.27 | 8.2   |
| membrane;integral component of membrane                            |                                   | 13.73 | 1.6   |
| membrane;i hsa:57835                                               | hsa04976 Bile secretion           | 24.01 | 6.53  |
| nucleus;nuc hsa:8331                                               | hsa04217;hs Necroptosis ;Alcoholi | 33.83 | 8.16  |
|                                                                    |                                   | 29.88 | 9.41  |
|                                                                    |                                   | 19.33 | 4.39  |
|                                                                    |                                   | 42.94 | 17.37 |
|                                                                    |                                   | 14.82 | 2.32  |
| negative reg hsa:5739                                              | hsa04080;hs Neuroactive ligand-r  | 34.75 | 70.62 |
|                                                                    |                                   | 35.15 | 12.75 |
|                                                                    |                                   | 22.23 | 5.35  |
|                                                                    |                                   | 69.77 | 32.02 |
|                                                                    |                                   | 10.79 | 0.51  |
|                                                                    |                                   | 28.75 | 8.48  |
|                                                                    |                                   | 19.86 | 4.39  |
|                                                                    |                                   | 43.84 | 17.63 |
|                                                                    |                                   | 11    | 0.53  |
|                                                                    |                                   | 17.66 | 3.53  |
|                                                                    |                                   | 20.3  | 4.45  |
|                                                                    |                                   | 20.41 | 4.16  |
|                                                                    |                                   | 15.77 | 2.79  |
|                                                                    |                                   | 18.16 | 3.85  |
|                                                                    |                                   | 23.75 | 6.4   |
|                                                                    |                                   | 26.11 | 7.29  |
|                                                                    |                                   | 12.33 | 1.28  |
|                                                                    |                                   | 50.12 | 22.36 |
|                                                                    |                                   | 22.8  | 5.98  |
|                                                                    |                                   | 20.02 | 4.63  |
|                                                                    |                                   | 48.01 | 20.77 |
|                                                                    |                                   | 29.52 | 9.79  |
| perinuclear region of cytoplasm;regulation of ventricular $\alpha$ |                                   | 22.57 | 52    |
|                                                                    |                                   | 23.89 | 6.14  |
|                                                                    |                                   | 32.3  | 10.78 |
|                                                                    |                                   | 16.64 | 3.34  |
|                                                                    |                                   | 37.27 | 14.4  |
|                                                                    |                                   | 14.29 | 2     |
|                                                                    |                                   | 16.88 | 3.28  |
| nucleus;proi hsa:55502                                             | hsa05165 Human papi bHLH          | 21.79 | 50.02 |
|                                                                    |                                   | 15.05 | 2.51  |
|                                                                    |                                   | 13.31 | 1.82  |
|                                                                    |                                   | 12.25 | 1.26  |

|                                                                                                    |       |       |
|----------------------------------------------------------------------------------------------------|-------|-------|
|                                                                                                    | 36.11 | 14.05 |
| intracellular hsa:374875 hsa00140;hs Steroid hormone bio:                                          | 16.93 | 43.13 |
|                                                                                                    | 41.39 | 15.54 |
|                                                                                                    | 11.79 | 1.02  |
|                                                                                                    | 16.51 | 3.02  |
| membrane;integral component of membrane                                                            | 5.84  | 0     |
|                                                                                                    | 57.4  | 26.95 |
|                                                                                                    | 26.18 | 7.97  |
|                                                                                                    | 18.79 | 3.86  |
|                                                                                                    | 33.58 | 11.92 |
| nucleus;DNA binding;chromatin DNA binding;nucleosome                                               | 13.04 | 1.77  |
| growth factc hsa:27006 hsa04010;hs MAPK signaling path                                             | 19.04 | 4.36  |
|                                                                                                    | 33.55 | 10.43 |
|                                                                                                    | 19.17 | 4.06  |
|                                                                                                    | 24.43 | 7.1   |
|                                                                                                    | 18.61 | 3.8   |
|                                                                                                    | 22.85 | 52.24 |
|                                                                                                    | 44.24 | 18.92 |
|                                                                                                    | 34.12 | 12.83 |
|                                                                                                    | 13.9  | 2.08  |
|                                                                                                    | 53.66 | 24.59 |
|                                                                                                    | 16.78 | 3.26  |
|                                                                                                    | 15.53 | 2.77  |
|                                                                                                    | 26.09 | 7.95  |
|                                                                                                    | 35.87 | 12.82 |
|                                                                                                    | 40.47 | 14.89 |
|                                                                                                    | 72.76 | 35.49 |
|                                                                                                    | 11.71 | 1.04  |
|                                                                                                    | 18.41 | 4     |
|                                                                                                    | 15.16 | 2.81  |
|                                                                                                    | 36.73 | 13.67 |
|                                                                                                    | 19.53 | 4.62  |
|                                                                                                    | 19.47 | 4.44  |
|                                                                                                    | 38.77 | 13.84 |
|                                                                                                    | 23.15 | 6.19  |
|                                                                                                    | 33.98 | 12.34 |
|                                                                                                    | 27.44 | 8.65  |
|                                                                                                    | 13.24 | 1.5   |
|                                                                                                    | 21.65 | 5.69  |
| intracellular;nucleotide binding;protein kinase activity;protein serine/threonine kinase activity: |       |       |
|                                                                                                    | 22.53 | 6.11  |
|                                                                                                    | 22.58 | 6.08  |
| cytoplasm;cytoplasm;mitochondrion;mitochondrion;autop                                              | 22.12 | 53.75 |
|                                                                                                    | 10.32 | 0.53  |
|                                                                                                    | 13.59 | 2.03  |

|                                                              |         |        |
|--------------------------------------------------------------|---------|--------|
|                                                              | 29.34   | 9.84   |
|                                                              | 24.55   | 6.57   |
| nucleus;nuc hsa:85417 hsa04068;hs FoxO signaling pathv       | 21.52   | 5.63   |
|                                                              | 19.78   | 4.37   |
|                                                              | 15.8    | 3.04   |
|                                                              | 10.39   | 0.74   |
|                                                              | 20.51   | 5.05   |
|                                                              | 12.3    | 1.32   |
|                                                              | 6.08    | 0      |
|                                                              | 53.98   | 25.63  |
| membrane;integral component of membrane;transmembr           | 35.29   | 71.93  |
| positive reg hsa:54361 hsa04150;hs mTOR signaling path       | 27.61   | 8.63   |
|                                                              | 15.44   | 2.74   |
|                                                              | 23.92   | 52.69  |
|                                                              | 16.1    | 3.03   |
|                                                              | 22.39   | 6.17   |
|                                                              | 29.12   | 9.72   |
|                                                              | 16.79   | 2.9    |
|                                                              | 19.2    | 4.37   |
|                                                              | 25.9    | 7.84   |
| negative regulation of endothelial cell apoptotic process;re | 56.6    | 26.18  |
|                                                              | 53.12   | 25.41  |
|                                                              | 31.86   | 11.23  |
|                                                              | 27.07   | 8.98   |
|                                                              | 1.71    | 14.54  |
|                                                              | 12.05   | 1.56   |
|                                                              | 25.12   | 7.7    |
| membrane;( hsa:51764 hsa04014;hs Ras signaling pathwa        | 31.9    | 11.36  |
|                                                              | 74.48   | 37.14  |
|                                                              | 5.66    | 0      |
|                                                              | 8.95    | 29.51  |
|                                                              | 5.56    | 0      |
|                                                              | 10.65   | 0.74   |
| nucleus;cytoplasm;intracellular transport;nucleus;cytoplasr  | 29.8    | 10.54  |
| cytoplasm;cell redox homeostasis;cytoskeleton;nucleoside     | 34.95   | 13.73  |
|                                                              | 39.64   | 14     |
|                                                              | 19.57   | 4.9    |
|                                                              | 13.82   | 2.27   |
|                                                              | 6.3     | 23.75  |
|                                                              | 28.05   | 9.32   |
|                                                              | 24.62   | 7.41   |
|                                                              | 13.47   | 1.74   |
|                                                              | 11.04   | 1.07   |
|                                                              | 18.39   | 3.46   |
|                                                              | 36.36   | 14.59  |
|                                                              | 7758.48 | 637.02 |
|                                                              | 17.89   | 3.31   |
|                                                              | 18.55   | 4.07   |

|                                                               |       |       |
|---------------------------------------------------------------|-------|-------|
|                                                               | 18.18 | 4.32  |
|                                                               | 20.49 | 5.41  |
|                                                               | 21.37 | 5.66  |
|                                                               | 16.1  | 2.7   |
| RNA binding; hsa:121504 hsa05034;hs Alcoholism ;Viral carc    | 26.95 | 8.08  |
| Z disc;cytoplasm;membrane;actin binding;plasma membrai        | 36.23 | 13.84 |
|                                                               | 14.92 | 2.79  |
|                                                               | 36.09 | 14.36 |
|                                                               | 18.46 | 4.14  |
|                                                               | 21.79 | 6.2   |
| oxidoreduct hsa:1733 hsa04919 Thyroid hormone sig             | 46.29 | 19.09 |
|                                                               | 12.97 | 36.4  |
|                                                               | 17.23 | 3.03  |
|                                                               | 50.49 | 23    |
|                                                               | 46.9  | 18.45 |
|                                                               | 5.69  | 0     |
| cytoplasm;cell adhesion;cytoskeleton;cell junction;focal adl  | 28.7  | 58.05 |
|                                                               | 20.13 | 4.66  |
|                                                               | 48.93 | 22.07 |
|                                                               | 14.61 | 2.55  |
| membrane;i hsa:1141 hsa04080;hs Neuroactive ligand-r          | 18.46 | 4.13  |
| positive regulation of cell proliferation;positive regulation | 28.33 | 58.86 |
|                                                               | 20.97 | 5.65  |
|                                                               | 17.49 | 3.9   |
|                                                               | 28.36 | 9.09  |
|                                                               | 10.52 | 1.06  |
| metal ion bi hsa:1300 hsa04974 Protein digestion anc          | 20.26 | 5.34  |
| intracellular signal transduction;protein binding;microtubu   | 28.74 | 10.14 |
| membrane;integral component of membrane;calcium ion t         | 23.67 | 6.96  |
|                                                               | 13.52 | 36.5  |
|                                                               | 16.82 | 3.83  |
|                                                               | 22.14 | 6.11  |
| cytoplasm;protein binding;protein kinase binding;protein l    | 15.68 | 38.64 |
|                                                               | 30.56 | 11.17 |
|                                                               | 15.85 | 2.97  |
|                                                               | 11.37 | 1.27  |
|                                                               | 18.39 | 3.81  |
|                                                               | 13.82 | 2.32  |
|                                                               | 10.61 | 1.04  |
|                                                               | 16.92 | 3.85  |
|                                                               | 5.33  | 0     |
| membrane;integral component of membrane;hydrolase ac          | 19.37 | 4.94  |
|                                                               | 23.95 | 7.43  |
|                                                               | 26.54 | 8.32  |
|                                                               | 19.61 | 4.86  |
|                                                               | 25.35 | 6.68  |
|                                                               | 26.37 | 8.79  |
|                                                               | 33.23 | 12.52 |

|                                                             |  |       |       |
|-------------------------------------------------------------|--|-------|-------|
|                                                             |  | 15.83 | 2.99  |
| hydrolase activity;phosphoprotein phosphatase activity;pe   |  | 47.06 | 21.3  |
|                                                             |  | 27.29 | 7.75  |
|                                                             |  | 24.38 | 7.6   |
|                                                             |  | 14.1  | 2.25  |
|                                                             |  | 18.49 | 4.57  |
|                                                             |  | 45.77 | 19.82 |
| nucleus;cytoplasm;protein binding;perinuclear region of cy  |  | 22.78 | 6.66  |
|                                                             |  | 49.84 | 22.61 |
| cytoplasm;membrane;integral component of membrane;ex        |  | 34.56 | 13.43 |
|                                                             |  | 14.14 | 2.58  |
|                                                             |  | 11.5  | 1.54  |
|                                                             |  | 14.61 | 2.81  |
|                                                             |  | 14.04 | 2.55  |
| zinc ion binding;metal ion binding;hydrolase activity;pepti |  | 33.8  | 13.09 |
|                                                             |  | 3.24  | 18.31 |
|                                                             |  | 17.68 | 3.67  |
|                                                             |  | 12.35 | 1.77  |
|                                                             |  | 5.29  | 0     |
|                                                             |  | 41.53 | 18.27 |
|                                                             |  | 9.19  | 0.53  |
|                                                             |  | 30.79 | 11.51 |
|                                                             |  | 29.21 | 10.66 |
|                                                             |  | 20.5  | 5.68  |
| positive regl hsa:5743 hsa00590;hs Arachidonic acid met     |  | 21.86 | 54.11 |
|                                                             |  | 24.11 | 7.03  |
|                                                             |  | 52.79 | 25.76 |
| nucleus;cytoplasm;membrane;mitochondrion;plasma mem         |  | 40.24 | 17.39 |
|                                                             |  | 15.58 | 2.97  |
|                                                             |  | 25.58 | 8.53  |
|                                                             |  | 13.87 | 2.26  |
|                                                             |  | 45.1  | 20.45 |
|                                                             |  | 26.82 | 8.43  |
|                                                             |  | 17.44 | 3.75  |
|                                                             |  | 9.8   | 0.74  |
|                                                             |  | 9.65  | 0.77  |
|                                                             |  | 25.02 | 8.12  |
|                                                             |  | 32.58 | 11.37 |
| nucleus;nuc hsa:8340 hsa05034;hs Alcoholism ;Viral carc     |  | 35.15 | 12.12 |
|                                                             |  | 17.29 | 4.14  |
|                                                             |  | 26.67 | 8.54  |
|                                                             |  | 31.45 | 11.62 |
| membrane;i hsa:8325 hsa04150;hs mTOR signaling path         |  | 28.93 | 59.16 |
|                                                             |  | 9.69  | 0.77  |
|                                                             |  | 18.31 | 3.89  |
| nucleus;nucleus;cytoplasm;cytosol;nucleoplasm;cytoskelet    |  | 53.61 | 25.77 |
|                                                             |  | 42.54 | 16.32 |
| membrane;integral component of membrane;plasma mem          |  | 15.85 | 41.9  |

|                                                                  |                                    |       |       |
|------------------------------------------------------------------|------------------------------------|-------|-------|
|                                                                  |                                    | 32.64 | 12.59 |
|                                                                  |                                    | 31.26 | 11.9  |
|                                                                  |                                    | 28.79 | 10.04 |
|                                                                  |                                    | 35.29 | 13.69 |
| extracellular space                                              |                                    | 24.41 | 7.82  |
|                                                                  |                                    | 24.82 | 6.49  |
|                                                                  |                                    | 28.14 | 9.93  |
| membrane; i                                                      | hsa:623                            | 30.81 | 63.26 |
|                                                                  | hsa:5554                           | 32.68 | 12.5  |
|                                                                  | hsa04020;hs Calcium signaling pat  | 26.8  | 9.27  |
|                                                                  | hsa04970 Salivary secretion        | 30.28 | 62.73 |
| negative regulation of phosphoprotein phosphatase activi         |                                    | 14.19 | 2.83  |
|                                                                  |                                    | 1.76  | 13.73 |
|                                                                  |                                    | 12.1  | 1.82  |
|                                                                  |                                    | 43.01 | 19.57 |
|                                                                  |                                    | 15.61 | 2.7   |
| positive reg                                                     | hsa:50943                          | 33.51 | 13.59 |
|                                                                  | hsa04659;hs Th17 cell dif Fork_hez | 13.86 | 2.61  |
|                                                                  |                                    | 41.01 | 17.63 |
|                                                                  |                                    | 25.58 | 8.06  |
|                                                                  |                                    | 20.64 | 5.59  |
|                                                                  |                                    | 27.74 | 9.47  |
|                                                                  |                                    | 30.45 | 10.27 |
|                                                                  |                                    | 24.1  | 7.84  |
|                                                                  |                                    | 19.71 | 5.59  |
|                                                                  |                                    | 11.37 | 1.48  |
|                                                                  |                                    | 28.91 | 10.66 |
|                                                                  |                                    | 15.2  | 3.34  |
|                                                                  |                                    | 57.21 | 28.24 |
|                                                                  |                                    | 31.59 | 11.65 |
|                                                                  |                                    | 11.82 | 1.58  |
|                                                                  |                                    | 11.36 | 1.47  |
|                                                                  |                                    | 14.89 | 2.59  |
| nucleic acid                                                     | hsa:155054                         | 15.08 | 37.49 |
|                                                                  | hsa05168 Herpes simp zf-C2H2       | 32.27 | 10.96 |
| RNA binding; membrane; integral component of membrane            |                                    | 28.69 | 10.14 |
| hydrolase activity; hydrolase activity; hydrolase activity; hydr |                                    | 31.97 | 11.8  |
|                                                                  |                                    | 9.01  | 0.5   |
|                                                                  |                                    | 5.14  | 0     |
|                                                                  |                                    | 29.36 | 10.44 |
|                                                                  |                                    | 11.1  | 1.3   |
|                                                                  |                                    | 12.18 | 1.84  |
|                                                                  |                                    | 16.79 | 4.07  |
| membrane; integral component of membrane; CatSper com            |                                    | 14.19 | 2.61  |
|                                                                  |                                    | 20.75 | 5.79  |
|                                                                  |                                    | 15.09 | 3.09  |
|                                                                  |                                    | 24.13 | 7.66  |
|                                                                  |                                    | 25.27 | 8.43  |

|                                                          |         |         |
|----------------------------------------------------------|---------|---------|
|                                                          | 25.83   | 8.59    |
|                                                          | 45.48   | 18.17   |
|                                                          | 18.64   | 4.81    |
|                                                          | 4.91    | 0       |
|                                                          | 9.87    | 1.06    |
|                                                          | 29.06   | 10.49   |
|                                                          | 14.54   | 3.05    |
|                                                          | 12.06   | 2.03    |
|                                                          | 15.23   | 2.53    |
|                                                          | 12.53   | 2.03    |
|                                                          | 23.31   | 6.34    |
|                                                          | 27.75   | 9.71    |
|                                                          | 3869.54 | 1846.77 |
|                                                          | 8.44    | 0.51    |
| membrane;integral component of membrane;calcium ion t    | 13.25   | 2.53    |
|                                                          | 26.43   | 8.85    |
|                                                          | 8.58    | 0.5     |
|                                                          | 22.29   | 7.16    |
|                                                          | 10.1    | 1.27    |
|                                                          | 48.95   | 23.27   |
| cytoplasm;nucleus;nucleus;cytoplasm;cytosol;growth facto | 5.83    | 21.67   |
|                                                          | 1.62    | 13.19   |
|                                                          | 15.44   | 3.54    |
|                                                          | 24.07   | 7.72    |
|                                                          | 15.74   | 3.6     |
|                                                          | 44.78   | 19.23   |
|                                                          | 15.91   | 3.61    |
|                                                          | 22.89   | 7.22    |
|                                                          | 10.65   | 1.27    |
|                                                          | 9.64    | 0.98    |
|                                                          | 26.05   | 9.21    |
|                                                          | 19.66   | 5.42    |
|                                                          | 17.65   | 3.6     |
|                                                          | 10.71   | 1.5     |
|                                                          | 23.59   | 7.48    |
|                                                          | 15.68   | 3.61    |
|                                                          | 23.85   | 7.87    |
|                                                          | 15.02   | 3.25    |
|                                                          | 19.74   | 5.69    |
| perinuclear   hsa:5350 hsa04020;hs Calcium signaling pat | 12.16   | 1.79    |
| zinc ion binding;metal ion binding                       | 11.24   | 1.56    |
|                                                          | 13.87   | 2.83    |
|                                                          | 35.13   | 14.92   |
|                                                          | 32.4    | 12.5    |
|                                                          | 8.3     | 0.51    |
|                                                          | 13.9    | 34.79   |
|                                                          | 14.1    | 2.61    |
|                                                          | 10.02   | 1.27    |

|                                                                |                                   |       |       |
|----------------------------------------------------------------|-----------------------------------|-------|-------|
| membrane;i hsa:51554                                           | hsa04060;hs Cytokine-cytokine re  | 36.6  | 15.59 |
|                                                                |                                   | 8.77  | 0.77  |
| membrane;extracellular region;endoplasmic reticulum            |                                   | 17.15 | 3.69  |
|                                                                |                                   | 13.99 | 2.76  |
|                                                                |                                   | 24.52 | 8.45  |
|                                                                |                                   | 10.91 | 1.22  |
|                                                                |                                   | 27.26 | 10.11 |
|                                                                |                                   | 18.7  | 4.22  |
|                                                                |                                   | 17.33 | 4.6   |
| nucleus;nuc hsa:8338                                           | hsa04217;hs Necroptosis ;Alcoholi | 27.93 | 9.24  |
|                                                                |                                   | 27.16 | 10.07 |
|                                                                |                                   | 24.54 | 8.22  |
|                                                                |                                   | 14.32 | 3.05  |
| membrane;i hsa:3595                                            | hsa04060;hs Cytokine-cytokine re  | 33.81 | 14.12 |
|                                                                |                                   | 4.92  | 0     |
|                                                                |                                   | 34.6  | 14.1  |
| extracellular space;hydrolase activity;peptidase activity;prot |                                   | 27.25 | 10.25 |
|                                                                |                                   | 8.67  | 0.77  |
| cytoplasm;membrane;apoptotic process;cytoplasm;membr           |                                   | 23.19 | 51.95 |
|                                                                |                                   | 9.36  | 1.03  |
|                                                                |                                   | 35.88 | 15.77 |
|                                                                |                                   | 15.72 | 3.84  |
| membrane;integral component of membrane;membrane;ir            |                                   | 33.93 | 14.33 |
|                                                                |                                   | 14.97 | 3.54  |
|                                                                |                                   | 18.44 | 4.26  |
|                                                                |                                   | 10.05 | 1.27  |
| membrane;integral component of membrane;symporter ac           |                                   | 17.04 | 4.38  |
| cytoplasm;membrane;protein transport;nucleotide binding        |                                   | 23.17 | 48.44 |
|                                                                |                                   | 12.58 | 2.1   |
|                                                                |                                   | 21.02 | 6.41  |
|                                                                |                                   | 39.33 | 15.51 |
|                                                                |                                   | 8.81  | 0.79  |
|                                                                |                                   | 18.17 | 5.12  |
|                                                                |                                   | 15.83 | 3.63  |
|                                                                |                                   | 29.15 | 10.84 |
|                                                                |                                   | 10.24 | 1.22  |
|                                                                |                                   | 4.83  | 0     |
|                                                                |                                   | 17.88 | 4.89  |
| membrane;i hsa:6751                                            | hsa04024;hs cAMP signaling path   | 5.37  | 20.33 |
|                                                                |                                   | 12.19 | 2.32  |
|                                                                |                                   | 30.17 | 11.1  |
|                                                                |                                   | 12.9  | 2.35  |
|                                                                |                                   | 4.59  | 0     |
|                                                                |                                   | 4.59  | 0     |
|                                                                |                                   | 36.69 | 15.79 |
|                                                                |                                   | 11.54 | 1.73  |
|                                                                |                                   | 23.46 | 7.46  |
|                                                                |                                   | 20.05 | 5.59  |



|                                                              |  |       |       |
|--------------------------------------------------------------|--|-------|-------|
|                                                              |  | 11.72 | 2.03  |
|                                                              |  | 14.84 | 3.54  |
|                                                              |  | 16.51 | 4.34  |
|                                                              |  | 9.14  | 1.04  |
| nucleus;metal ion binding;regulation of transcript Fork_hez  |  | 42.52 | 19.36 |
|                                                              |  | 15.08 | 3.52  |
|                                                              |  | 6.4   | 0.24  |
|                                                              |  | 12.15 | 2.3   |
| mRNA bindi hsa:406925 hsa05206 MicroRNAs in cancer           |  | 9.74  | 1.27  |
| membrane;integral component of membrane;membrane;ir          |  | 15.66 | 3.8   |
|                                                              |  | 8.48  | 0.74  |
|                                                              |  | 21.4  | 6.33  |
|                                                              |  | 9.03  | 1.03  |
|                                                              |  | 11.4  | 2.04  |
| intracellular protein transport;vesicle-mediated transport;n |  | 28.97 | 10.58 |
|                                                              |  | 24.72 | 8.71  |
|                                                              |  | 13.31 | 2.75  |
|                                                              |  | 8.17  | 0.51  |
| membrane;plasma membrane;cell junction;synapse;postsyl       |  | 17.98 | 40.92 |
|                                                              |  | 46.7  | 22.88 |
|                                                              |  | 36.14 | 15.4  |
|                                                              |  | 13.77 | 2.89  |
| membrane;integral component of membrane;membrane;ir          |  | 24.96 | 8.88  |
|                                                              |  | 10.21 | 1.21  |
|                                                              |  | 21.61 | 7.1   |
|                                                              |  | 10.98 | 1.77  |
|                                                              |  | 29.16 | 10.23 |
|                                                              |  | 21.93 | 7.37  |
|                                                              |  | 6.35  | 0.27  |
| nucleus;nucleus;metal ion binding;nucleoplasm;transferase    |  | 44.63 | 20.73 |
| regulation c hsa:51738 hsa04024;hs cAMP signaling path       |  | 40.98 | 18.34 |
|                                                              |  | 10.49 | 1.53  |
| membrane;i hsa:3820 hsa05144 Malaria                         |  | 39.63 | 18.56 |
|                                                              |  | 18.84 | 4.94  |
|                                                              |  | 34.17 | 14.49 |
|                                                              |  | 30.6  | 12.69 |
| membrane;i hsa:59285 hsa04010;hs MAPK signaling path         |  | 8.98  | 26.97 |
|                                                              |  | 18.76 | 5.62  |
|                                                              |  | 8.39  | 0.77  |
|                                                              |  | 10.65 | 1.51  |
|                                                              |  | 14.39 | 3.05  |
|                                                              |  | 7.69  | 0.5   |
| cytoplasm;Golgi apparatus;cytosol;actin binding;actin filan  |  | 27.74 | 10.52 |
|                                                              |  | 27.4  | 10.06 |
| circadian reç hsa:8863 hsa04710;hs Circadian rhythm ;Cir     |  | 42.78 | 20.87 |
|                                                              |  | 6.26  | 0.27  |
|                                                              |  | 11.09 | 1.74  |
|                                                              |  | 10.67 | 1.53  |

|                                                               |                                   |             |
|---------------------------------------------------------------|-----------------------------------|-------------|
|                                                               | 11.22                             | 1.73        |
|                                                               | 11.61                             | 1.79        |
|                                                               | 17.68                             | 4.69        |
|                                                               | 17.86                             | 4.22        |
|                                                               | 44.16                             | 20.68       |
|                                                               | 30.78                             | 12.65       |
|                                                               | 27.08                             | 9.64        |
|                                                               | 20.45                             | 6.69        |
|                                                               | 15.35                             | 3.17        |
|                                                               | 14.81                             | 3.14        |
|                                                               | 16.46                             | 4.57        |
|                                                               | 21.76                             | 7.09        |
|                                                               | 10.84                             | 1.82        |
|                                                               | 15.74                             | 3.5         |
|                                                               | 17.02                             | 4.67        |
|                                                               | 9.78                              | 1.25        |
|                                                               | 12.29                             | 2.31        |
|                                                               | 28.06                             | 10.67       |
|                                                               | 10.85                             | 1.82        |
|                                                               | 17.67                             | 4.82        |
|                                                               | 20.9                              | 6.96        |
| membrane;i hsa:1133                                           | hsa04020;hs Calcium signaling pat | 8.11 0.77   |
|                                                               |                                   | 22.98 7.63  |
|                                                               |                                   | 11.86 2.32  |
| nucleus;nuc hsa:4929                                          | hsa04925;hs Aldosterone NGFIB-li  | 18.63 40.72 |
| protein binding;extracellular region;extracellular space;corr |                                   | 0.37 8.56   |
|                                                               |                                   | 16.33 4.14  |
|                                                               |                                   | 21.01 6.92  |
|                                                               |                                   | 16.23 4.38  |
| membrane;integral component of membrane;metal ion bir         |                                   | 20.27 5.97  |
|                                                               |                                   | 18.7 5.39   |
|                                                               |                                   | 13.45 2.79  |
|                                                               |                                   | 32.07 13.64 |
|                                                               |                                   | 9.09 1.04   |
|                                                               |                                   | 38.65 16.58 |
|                                                               |                                   | 10.34 1.55  |
|                                                               |                                   | 21.64 6.77  |
|                                                               |                                   | 17.66 4.92  |
|                                                               |                                   | 9.14 1.07   |
|                                                               |                                   | 21.88 7.47  |
|                                                               |                                   | 7.64 0.51   |
|                                                               |                                   | 42.15 19.3  |
|                                                               |                                   | 32.45 13.79 |
|                                                               |                                   | 29.61 12.2  |
|                                                               |                                   | 17.22 4.43  |
|                                                               |                                   | 4.4 0       |
|                                                               |                                   | 8.21 0.79   |
| intracellular;membrane;nucleotide binding;protein ubiquit     |                                   | 40.34 19.39 |

|                                                           |       |       |
|-----------------------------------------------------------|-------|-------|
|                                                           | 20.56 | 6.17  |
|                                                           | 25.17 | 9.03  |
| membrane;integral component of membrane;G protein-co      | 27.1  | 9.52  |
|                                                           | 18.84 | 5.39  |
|                                                           | 10.57 | 1.74  |
|                                                           | 23.42 | 7.31  |
|                                                           | 19.66 | 6.18  |
|                                                           | 4.27  | 0     |
|                                                           | 16.41 | 4.58  |
| carbohydrate binding;protein binding;galactoside binding  | 10.22 | 1.32  |
|                                                           | 17.32 | 4.58  |
|                                                           | 26.23 | 9.69  |
|                                                           | 18.57 | 5.62  |
|                                                           | 14.65 | 3.61  |
|                                                           | 7.46  | 0.5   |
|                                                           | 19.58 | 5.83  |
|                                                           | 30.16 | 12.48 |
|                                                           | 9.5   | 1.26  |
| protein kina hsa:1027235 hsa04114;hs Oocyte meiosis ;Prog | 21.18 | 6.78  |
|                                                           | 14.01 | 3.25  |
| cytoplasm;n hsa:4145 hsa04722 Neurotrophin signali        | 2.6   | 13.44 |
|                                                           | 14.06 | 3.31  |
|                                                           | 24.71 | 7.53  |
| membrane;integral component of membrane;cytosol;nucle     | 4.46  | 0     |
|                                                           | 6.74  | 0.26  |
|                                                           | 9.72  | 1.3   |
| cytoplasm;membrane;cytosol;regulation of apoptotic proce  | 20.87 | 6.76  |
| protein homooligomerization;protein binding               | 12.2  | 2.57  |
|                                                           | 15.58 | 4.01  |
|                                                           | 16.47 | 4.32  |
|                                                           | 25.31 | 8.68  |
|                                                           | 28.7  | 11.57 |
|                                                           | 12.88 | 2.61  |
|                                                           | 26.58 | 10.03 |
|                                                           | 14.93 | 3.77  |
|                                                           | 12.18 | 2.52  |
|                                                           | 38.64 | 17.98 |
|                                                           | 10.23 | 0.95  |
|                                                           | 5.84  | 0.27  |
|                                                           | 14.6  | 3.43  |
| nucleus;regulation of transcription, DNA-templat Homeob   | 0     | 5.37  |
|                                                           | 26.86 | 10.27 |
|                                                           | 8.44  | 1.03  |
| hydrolase ac hsa:834 hsa04217;hs Necroptosis ;NOD-lik     | 8.06  | 24.57 |
| membrane;integral component of membrane;hydrolase ac      | 28.27 | 11.49 |
|                                                           | 14.9  | 3.61  |
|                                                           | 18.38 | 5.18  |
|                                                           | 17.35 | 4.36  |

|                                                              |       |       |
|--------------------------------------------------------------|-------|-------|
|                                                              | 10.16 | 1.55  |
| negative regulation of fibroblast growth factor receptor sig | 12.66 | 2.46  |
|                                                              | 13.12 | 3.05  |
|                                                              | 8.94  | 1.07  |
|                                                              | 17.68 | 5.06  |
|                                                              | 15.13 | 3.79  |
|                                                              | 4.26  | 0     |
|                                                              | 16.7  | 3.72  |
| membrane;integral component of membrane;calcium ion t        | 25.05 | 8.79  |
|                                                              | 8.82  | 1.02  |
|                                                              | 16.69 | 4.86  |
|                                                              | 13.94 | 3.29  |
|                                                              | 31.49 | 12.51 |
|                                                              | 8.06  | 0.79  |
|                                                              | 9.7   | 1.31  |
|                                                              | 12.99 | 2.82  |
|                                                              | 12.19 | 2.55  |
|                                                              | 10.38 | 1.58  |
|                                                              | 20.53 | 7.13  |
|                                                              | 35.98 | 16.51 |
|                                                              | 12.62 | 2.55  |
|                                                              | 21.87 | 7.85  |
|                                                              | 8.46  | 0.77  |
| metal ion binding;snoRNA splicing;U2-type spliceosomal c     | 11.48 | 2.27  |
|                                                              | 6.02  | 0.26  |
|                                                              | 36.18 | 16.18 |
|                                                              | 9.28  | 0.77  |
|                                                              | 8.39  | 0.71  |
|                                                              | 9.19  | 1.07  |
|                                                              | 13.28 | 2.73  |
| membrane;integral component of membrane;carbohydrate         | 0     | 5.35  |
|                                                              | 25.62 | 9.96  |
| cytoplasm;n hsa:4671 hsa04621;hs NOD-like receptor sig       | 34.79 | 15.83 |
|                                                              | 36.05 | 15.75 |
|                                                              | 13.03 | 3.07  |
|                                                              | 8.34  | 1.04  |
| membrane;zinc ion binding;metal ion binding;intracellular;   | 5.83  | 0.26  |
|                                                              | 9.59  | 1.54  |
|                                                              | 19.34 | 6.37  |
|                                                              | 6.16  | 0.27  |
|                                                              | 27.58 | 9.9   |
|                                                              | 12.67 | 2.84  |
| protein binding                                              | 22.58 | 7.57  |
| membrane;integral component of membrane;G protein-co         | 11.72 | 2.34  |
|                                                              | 30.66 | 13.29 |
|                                                              | 8.07  | 0.78  |
|                                                              | 10.57 | 1.71  |
| membrane;( hsa:2785 hsa04014;hs Ras signaling pathwa         | 31.06 | 13.7  |

|                                                       |       |       |
|-------------------------------------------------------|-------|-------|
|                                                       | 17.26 | 4.93  |
|                                                       | 5.8   | 0.26  |
|                                                       | 19.61 | 6.67  |
|                                                       | 11.59 | 2.32  |
| membrane;integral component of membrane;membrane;ir   | 12.06 | 2.52  |
|                                                       | 5.71  | 0.27  |
|                                                       | 5.75  | 0.26  |
|                                                       | 20.71 | 6.2   |
|                                                       | 47.28 | 20.63 |
| cytoplasm;rc hsa:398 hsa04722;hs Neurotrophin signali | 19.09 | 41.38 |
|                                                       | 7.64  | 0.77  |
|                                                       | 39.54 | 19.48 |
| membrane;integral component of membrane;Golgi membr   | 23.83 | 8.91  |
|                                                       | 10.93 | 2.06  |
|                                                       | 32.31 | 14.21 |
|                                                       | 5.05  | 18.37 |
|                                                       | 28.09 | 11.65 |
|                                                       | 10.14 | 1.77  |
|                                                       | 21.96 | 7.08  |
|                                                       | 11.41 | 1.97  |
|                                                       | 7.23  | 0.52  |
|                                                       | 8.9   | 1.29  |
|                                                       | 7.7   | 0.74  |
| protein dim hsa:83547 hsa04145;hs Phagosome ;Salmon   | 13.29 | 31.7  |
|                                                       | 21.27 | 7.69  |
|                                                       | 15.03 | 4.05  |
|                                                       | 12.11 | 2.38  |
|                                                       | 23.67 | 8.04  |
|                                                       | 22.54 | 8.12  |
|                                                       | 11.68 | 2.26  |
|                                                       | 9.37  | 1.33  |
|                                                       | 11.63 | 2.56  |
|                                                       | 14.06 | 3.57  |
|                                                       | 25.56 | 9.63  |
|                                                       | 15.13 | 3.83  |
|                                                       | 11.41 | 2.31  |
|                                                       | 4.04  | 0     |
|                                                       | 16.28 | 4.59  |
|                                                       | 27.49 | 10.7  |
|                                                       | 4.16  | 0     |
|                                                       | 6.96  | 0.5   |
|                                                       | 19.25 | 6.16  |
|                                                       | 15.49 | 4.12  |
|                                                       | 16.7  | 4.83  |
|                                                       | 13.45 | 3.34  |
|                                                       | 28.93 | 11.47 |
|                                                       | 18.64 | 5.71  |
|                                                       | 25    | 9.4   |

|                                                                |                                    |       |       |
|----------------------------------------------------------------|------------------------------------|-------|-------|
|                                                                |                                    | 9.31  | 1.53  |
|                                                                |                                    | 19.99 | 6.96  |
|                                                                |                                    | 17.6  | 5.21  |
|                                                                |                                    | 8.9   | 1.25  |
|                                                                |                                    | 5.69  | 0.27  |
| membrane;i hsa:4360                                            | hsa04145;hs Phagosome ;Tubercu     | 3.99  | 0     |
| cytoplasmic vesicle;acrosomal vesicle;multicellular organisr   |                                    | 18.49 | 6.09  |
|                                                                |                                    | 15.75 | 4.63  |
|                                                                |                                    | 10.53 | 2.01  |
| membrane;integral component of membrane;calcium ion t          |                                    | 8.66  | 1.27  |
|                                                                |                                    | 11.72 | 2.49  |
|                                                                |                                    | 15.69 | 4.35  |
|                                                                |                                    | 19.86 | 6.66  |
|                                                                |                                    | 29.85 | 12.11 |
|                                                                |                                    | 21.64 | 7.81  |
|                                                                |                                    | 20.07 | 6.98  |
|                                                                |                                    | 3.98  | 0     |
|                                                                |                                    | 15.33 | 3.6   |
|                                                                |                                    | 16.08 | 4.47  |
| membrane;integral component of membrane;integral comj          |                                    | 13.02 | 3.12  |
|                                                                |                                    | 8.62  | 1.27  |
| protein binding;extracellular region;collagen trimer;molecu    |                                    | 28.86 | 59.53 |
|                                                                |                                    | 4.37  | 0     |
|                                                                |                                    | 8.21  | 1.06  |
|                                                                |                                    | 14.94 | 4.13  |
|                                                                |                                    | 11.94 | 2.3   |
|                                                                |                                    | 22.71 | 8.72  |
|                                                                |                                    | 25.26 | 6.17  |
|                                                                |                                    | 14.15 | 3.64  |
|                                                                |                                    | 15.88 | 4.32  |
| extracellular region;proteolysis;peptidase activity;extracellu |                                    | 16.32 | 4.8   |
| membrane;i hsa:6519                                            | hsa04974 Protein digestion anc     | 14.06 | 3.21  |
|                                                                |                                    | 24.52 | 9.55  |
| intracellular; hsa:10663                                       | hsa04060;hs Cytokine-cytokine re   | 22.83 | 8.36  |
|                                                                |                                    | 16.54 | 4.09  |
|                                                                |                                    | 12.28 | 2.73  |
|                                                                |                                    | 9.73  | 1.79  |
| RNA binding; hsa:8360                                          | hsa05034;hs Alcoholism ;Viral carc | 13.87 | 3.55  |
| RNA binding; hsa:8359                                          | hsa05034;hs Alcoholism ;Viral carc | 14.11 | 3.57  |
|                                                                |                                    | 12.89 | 3.03  |
| nucleus;nuc hsa:25788                                          | hsa03440 Homologous recomb         | 7.92  | 1.04  |
|                                                                |                                    | 13.68 | 31.21 |
|                                                                |                                    | 31.26 | 13.96 |
|                                                                |                                    | 13.83 | 3.22  |
|                                                                |                                    | 24.36 | 9.16  |
|                                                                |                                    | 10.38 | 2.04  |
|                                                                |                                    | 9.52  | 1.32  |
|                                                                |                                    | 15.79 | 4.42  |

|                                                           |       |       |
|-----------------------------------------------------------|-------|-------|
|                                                           | 19.75 | 6.89  |
|                                                           | 5.38  | 0.26  |
|                                                           | 29.85 | 12.39 |
|                                                           | 8.06  | 1.04  |
| membrane;integral component of membrane;protein bindi     | 6.91  | 0.52  |
| membrane;i hsa:390037 hsa04740 Olfactory transductio      | 5.42  | 0.26  |
| RNA binding;nucleus;nucleus;cytoplasm;cytoplasm;transfe   | 1.3   | 10.08 |
|                                                           | 14.22 | 3.64  |
|                                                           | 3.85  | 0     |
|                                                           | 14.05 | 3.84  |
|                                                           | 11.7  | 2.35  |
|                                                           | 29.82 | 13.17 |
|                                                           | 7.46  | 0.8   |
|                                                           | 6.96  | 0.54  |
| membrane;integral component of membrane;calcium ion t     | 10.34 | 2.03  |
|                                                           | 13.35 | 3.31  |
|                                                           | 15.31 | 4.13  |
|                                                           | 30.29 | 13.26 |
|                                                           | 5.66  | 0.26  |
|                                                           | 35.34 | 16.67 |
|                                                           | 10.1  | 1.79  |
|                                                           | 8.11  | 1.06  |
|                                                           | 7.88  | 0.77  |
|                                                           | 17.58 | 5.63  |
|                                                           | 10.85 | 2.31  |
|                                                           | 12.06 | 2.61  |
| folic acid bir hsa:2352 hsa01523;hs Antifolate resistance | 5     | 17.64 |
|                                                           | 3.95  | 0     |
|                                                           | 21.09 | 7.85  |
|                                                           | 24.11 | 8.89  |
|                                                           | 3.8   | 0     |
| membrane;i hsa:390649 hsa04740 Olfactory transductio      | 9.4   | 1.54  |
|                                                           | 9.49  | 25.6  |
|                                                           | 19.54 | 6.59  |
|                                                           | 14.79 | 3.78  |
|                                                           | 8.52  | 1.27  |
|                                                           | 7.85  | 0.77  |
|                                                           | 19.13 | 5.89  |
|                                                           | 9.03  | 1.53  |
|                                                           | 29.38 | 12.99 |
| cytoplasm;membrane;plasma membrane;cytoskeleton;cell      | 13.5  | 32.37 |
|                                                           | 10.26 | 1.79  |
| membrane;i hsa:50831 hsa04742 Taste transduction          | 14.37 | 4.02  |
|                                                           | 5.57  | 0.24  |
| intracellular;membrane;nucleotide binding;signal transduc | 6.36  | 19.52 |
|                                                           | 36    | 17.21 |
| membrane;integral component of membrane;membrane;ir       | 27.15 | 11.68 |
|                                                           | 10.29 | 2.07  |

|                                                            |                                              |       |       |
|------------------------------------------------------------|----------------------------------------------|-------|-------|
|                                                            |                                              | 28.55 | 11.45 |
|                                                            |                                              | 15.64 | 4.39  |
|                                                            |                                              | 10.82 | 2.02  |
| cytoplasm;c                                                | hsa:10993 hsa00260;hs Glycine, serine and th | 24.79 | 8.57  |
|                                                            |                                              | 8.95  | 1.53  |
|                                                            |                                              | 8.12  | 1.07  |
|                                                            |                                              | 9.59  | 1.58  |
|                                                            |                                              | 0     | 4.81  |
| RNA binding                                                | hsa:8361 hsa05034;hs Alcoholism ;Viral carc  | 19.49 | 6.64  |
|                                                            |                                              | 33.51 | 15.83 |
| membrane;nucleus;nucleoplasm;mitochondrion;plasma me       |                                              | 12.49 | 2.59  |
|                                                            |                                              | 37.95 | 18.33 |
|                                                            |                                              | 13.81 | 3.78  |
|                                                            |                                              | 17.93 | 5.94  |
|                                                            |                                              | 26.9  | 10.93 |
|                                                            |                                              | 17.69 | 5.29  |
|                                                            |                                              | 37.75 | 18.34 |
|                                                            |                                              | 17.01 | 5     |
|                                                            |                                              | 16.88 | 5.41  |
|                                                            |                                              | 5.39  | 0.26  |
|                                                            |                                              | 21.63 | 7.86  |
|                                                            |                                              | 9.51  | 1.59  |
|                                                            |                                              | 5.24  | 0.26  |
|                                                            |                                              | 9.36  | 1.55  |
| positive regl                                              | hsa:3918 hsa04151;hs PI3K-Akt signaling pi   | 19.24 | 39.56 |
|                                                            |                                              | 19.01 | 6.47  |
|                                                            |                                              | 8.96  | 1.33  |
|                                                            |                                              | 18.99 | 6.01  |
|                                                            |                                              | 6.68  | 0.51  |
|                                                            |                                              | 15.77 | 4.83  |
|                                                            |                                              | 18.05 | 5.85  |
|                                                            |                                              | 20.08 | 7.18  |
| metal ion binding;transferase activity;protein ubiquitatio |                                              | 19.37 | 6.93  |
| intracellular                                              | hsa:1285 hsa04151;hs PI3K-Akt signaling pi   | 28.18 | 12.48 |
|                                                            |                                              | 17.55 | 5.29  |
|                                                            |                                              | 19.03 | 6.17  |
|                                                            |                                              | 13.44 | 3.39  |
|                                                            |                                              | 7.69  | 1.04  |
|                                                            |                                              | 11.11 | 2.31  |
|                                                            |                                              | 11.05 | 2.31  |
|                                                            |                                              | 9.69  | 1.83  |
|                                                            |                                              | 18.88 | 6.65  |
|                                                            |                                              | 3.89  | 0     |
|                                                            |                                              | 10.99 | 2.12  |
|                                                            |                                              | 22.59 | 8.1   |
| nucleus;cytosol;nucleoplasm;cell cycle;gamete generation;i |                                              | 15.35 | 4.01  |
|                                                            |                                              | 25.57 | 10.09 |
|                                                            |                                              | 5.25  | 0.27  |



|                                                             |  |  |        |        |
|-------------------------------------------------------------|--|--|--------|--------|
|                                                             |  |  | 12.01  | 2.76   |
|                                                             |  |  | 3.71   | 0      |
|                                                             |  |  | 17.45  | 5.21   |
|                                                             |  |  | 17.75  | 5.64   |
|                                                             |  |  | 9.28   | 1.54   |
|                                                             |  |  | 11.77  | 28.9   |
|                                                             |  |  | 13.01  | 2.85   |
|                                                             |  |  | 20.91  | 7.95   |
|                                                             |  |  | 8.59   | 0.98   |
| protein serine/threonine kinase activity;ATP binding;protei |  |  | 35.86  | 17.6   |
|                                                             |  |  | 21.96  | 8.5    |
|                                                             |  |  | 8.54   | 1.27   |
|                                                             |  |  | 36.42  | 16.76  |
|                                                             |  |  | 21.68  | 8      |
|                                                             |  |  | 30.32  | 14.05  |
|                                                             |  |  | 8.44   | 1.25   |
|                                                             |  |  | 18.23  | 6.18   |
|                                                             |  |  | 17.74  | 38.01  |
| metal ion bi hsa:91734 hsa00900;hs Terpenoid backbone       |  |  | 14.24  | 3.67   |
|                                                             |  |  | 26.02  | 10.84  |
| nucleus;nucleus;cytoplasm;protein binding;biological_proc   |  |  | 0.42   | 6.84   |
|                                                             |  |  | 9.37   | 1.5    |
|                                                             |  |  | 8.06   | 1.02   |
|                                                             |  |  | 24.85  | 9.89   |
|                                                             |  |  | 12.74  | 2.96   |
|                                                             |  |  | 6.35   | 0.5    |
|                                                             |  |  | 16.89  | 5.36   |
|                                                             |  |  | 15.52  | 4.54   |
|                                                             |  |  | 25.85  | 10.98  |
|                                                             |  |  | 12.3   | 3.04   |
| membrane;z hsa:4326 hsa04928 Parathyroid hormone            |  |  | 13.95  | 32.1   |
|                                                             |  |  | 28.14  | 11.98  |
| cytoplasm;c hsa:58538 hsa04530 Tight junction               |  |  | 15.78  | 33.86  |
|                                                             |  |  | 20.95  | 7.95   |
|                                                             |  |  | 10.9   | 2.35   |
|                                                             |  |  | 9.35   | 1.55   |
|                                                             |  |  | 7.84   | 1.01   |
|                                                             |  |  | 6.35   | 0.53   |
|                                                             |  |  | 3.7    | 0      |
| protein binding;protein binding;protein binding             |  |  | 9.14   | 1.57   |
|                                                             |  |  | 104.41 | 289.79 |
|                                                             |  |  | 9.85   | 1.48   |
|                                                             |  |  | 19.4   | 5.97   |
|                                                             |  |  | 3.66   | 0      |
|                                                             |  |  | 29.51  | 12.6   |
|                                                             |  |  | 18.5   | 6.46   |
|                                                             |  |  | 17.16  | 5.41   |
|                                                             |  |  | 21.46  | 7.53   |

|                                                             |       |       |
|-------------------------------------------------------------|-------|-------|
| extracellular space                                         | 5.01  | 0.26  |
|                                                             | 8.44  | 1.21  |
|                                                             | 16.1  | 4.89  |
|                                                             | 9.56  | 1.82  |
|                                                             | 17.21 | 5.61  |
|                                                             | 8.75  | 1.5   |
|                                                             | 10.38 | 2.3   |
|                                                             | 23.94 | 9.64  |
|                                                             | 10.87 | 2.05  |
|                                                             | 21.85 | 8.35  |
| cytoplasm;cytosol;nucleoplasm;protein binding;guanyl-nu     | 9     | 1.26  |
|                                                             | 9.66  | 1.57  |
|                                                             | 13.94 | 3.5   |
|                                                             | 25.63 | 11.07 |
|                                                             | 7.32  | 0.8   |
|                                                             | 7.88  | 1.06  |
|                                                             | 19.2  | 6.88  |
| cytoplasm;intracellular protein transport;metal ion binding | 8.8   | 1.53  |
|                                                             | 10.77 | 2.27  |
|                                                             | 7.84  | 21.3  |

















on channel activity;ion transport;voltage-gated ion channel activity;regulation of ion tr



























;ATP binding;protein phosphorylation;transferase activity;MAP kinase activity;kinase act





















































ansmembrane transport;plasma membrane;plasma membrane;calcium ion transport;calc





























ivity;MAPK cascade;phosphorylation;intracellular;nucleotide binding;protein kinase acti





















































calcium ion transmembrane transport; voltage-gated calcium channel activity; calcium chanr





























vity;protein serine/threonine kinase activity;ATP binding;protein phosphorylation;trans





















































rel activity;calcium ion transmembrane transport;voltage-gated calcium channel comple



























ferase activity;MAP kinase activity;kinase activity;MAPK cascade;phosphorylation;intrac





















































x;low voltage-gated calcium channel activity;calcium ion import;plasma membrane;volt:





























cellular; nucleotide binding; protein kinase activity; protein serine/threonine kinase activity;





















































age-gated calcium channel complex;regulation of membrane potential;calcium ion impc



























ATP binding;protein phosphorylation;transferase activity;MAP kinase activity;kinase act





















































ort;scaffold protein binding;calcium ion import;low voltage-gated calcium channel activi





























ivity;MAPK cascade;phosphorylation;nucleus;cytoplasm;cytoplasm;membrane;nucleotid





















































ty;low voltage-gated calcium channel activity;voltage-gated calcium channel activity inv





























e binding;protein kinase activity;protein serine/threonine kinase activity;ATP binding;pr





















































involved in AV node cell action potential; voltage-gated calcium channel activity involved 5



























rotein phosphorylation;transferase activity;MAP kinase activity;kinase activity;phosphory





















































∫A node cell action potential;neuronal action potential;positive regulation of calcium ion





























ylation;mitochondrion;mitochondrion;plasma membrane;protein binding;rhythmic proc





















































$\text{Ca}^{2+}$ -dependent exocytosis; cardiac muscle cell action potential involved in contraction;





























ess;Fc-epsilon receptor signaling pathway;nucleus;cytoplasm;i
